# Supplementary material for: Arsolyl-supported intermetallic dative bonding
Source: Royal Society of Chemistry journal article supplement (doi:10.1039/d2sc01200f), 2022-01-01
Supplement: d2sc01200f1.pdf [file d2sc01200f1.pdf]

## Arsolyl-Supported Intermetallic Dative Bonding

Ryan M. Kirk and Anthony F. Hill\*

**Abstract:** The first examples of late transition metal  $\eta^5$ -arsolyls serve as ditopic donors to extraneous metal centres ( $M = \text{Pt}^{\text{II}}, \text{Au}^{\text{I}}, \text{Hg}^{\text{II}}$ ) through both conventional  $\text{As} \rightarrow M$  and polar-covalent (dative)  $\text{Co} \rightarrow M$  interactions.

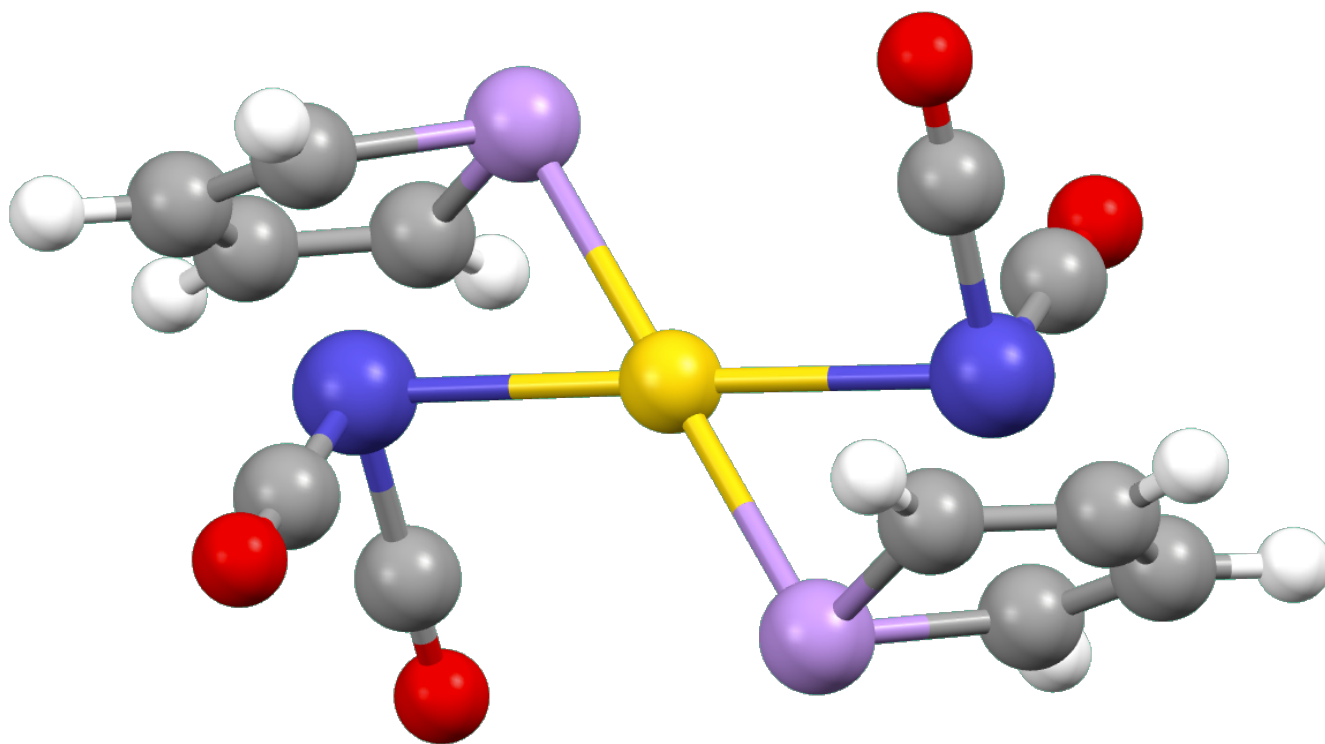

## Table of Contents

1. General Considerations and Instrumentation
2. Computational Details
3. Additional Tables and Figures
4. Synthetic Procedures and Spectroscopic and Crystallographic Data
5. Selected Spectra
6. Author Contributions
7. References

## Experimental Procedures

### 1. General Considerations

NMR data were collected on a Bruker Avance 400 ( $^1\text{H}$  at 400.1 MHz,  $^{19}\text{F}$  at 376.5 MHz,  $^{31}\text{P}$  at 161.9 MHz) or Bruker Avance 700 ( $^{13}\text{C}$  at 176.1 MHz,  $^{195}\text{Pt}$  at 149.8 MHz) spectrometers at the temperature indicated; chemical shifts ( $\delta$ ) are given in ppm with coupling constants in Hz and are referenced to the residual protio-solvent impurity signal (for  $^1\text{H}$ ), the solvent signal itself (for  $^{13}\text{C}$ ) or an external reference ( $\text{CFCl}_3$  for  $^{19}\text{F}$ , 85%  $\text{H}_3\text{PO}_4$  for  $^{31}\text{P}$ , 1.2 M  $\text{Na}_2\text{PtCl}_6$  ( $\delta_{\text{Pt}} = 0$ ) for  $^{195}\text{Pt}$ ). Spectra provided generally correspond to samples obtained directly from chromatography and occasionally contain residual solvent signals. Phosphorus-31 resonances were somewhat broadened due to coupling to quadrupolar ( $I = 7/2$ )  $^{59}\text{Co}$  nuclei. The multiplicities of NMR resonances are denoted by the abbreviations s (singlet), d (doublet), t (triplet), m (multiplet), br (broad) and combinations thereof for more highly coupled systems; we thank Dr Doug Lawes for assistance and helpful discussion. Solution infrared spectra were collected using a PerkinElmer Spectrum One FT-IR spectrometer with 1 mm cell pathlength and KBr windows. Elemental microanalytical data were provided by Elemental Microanalysis Service at Macquarie University. High-resolution electron ionisation (EI) and electrospray ionisation (ESI, +ve ion) mass spectrometry were performed by Mrs Anitha Jeyasingham at the ANU Research School of Chemistry mass spectrometry service with acetonitrile matrices. X-ray crystallography was performed on an Agilent Technologies Supernova EoS2-CCD diffractometer and specific details for each crystalline specimen are given below; we thank Dr Michael Gardiner for assistance and helpful discussion.

Unless otherwise stated, all operations were performed under an atmosphere of commercially purified nitrogen or argon using standard Schlenk techniques, or inside an argon-filled glovebox ( $[\text{O}_2] < 5$  ppm,  $[\text{H}_2\text{O}] < 1$  ppm); all compounds described herein are air-sensitive though some (unless otherwise stated) appear immune to adventitious moisture. Caution should be exercised when handling the organoarsenic compounds described herein – their toxicological properties are presently unknown, and they should be regarded as extremely toxic materials. The hazardous toxicological properties of  $\text{PhAsCl}_2$ ,  $\text{AsCl}_3$ ,  $\text{Bu}_2\text{SnCl}_2$  and  $\text{HgCl}_2$  are well known, and they too should be handled with respect by trained persons equipped with appropriate safety equipment. Benzene

(including  $\text{C}_6\text{D}_6$ ) is a potent carcinogen and should only be used in a well-ventilated fumehood in quantities as small as is reasonably possible. Residues containing heavy metals or metalloids should be disposed of appropriately with consideration given to the ecological impact of these elements. Care should also be exercised when storing solvents over alkali metal surfaces for their extreme flammability. HPLC-grade solvents were obtained from Merck; THF, benzene, toluene and  $\text{Et}_2\text{O}$  were distilled from sodium-benzophenone ketyl under nitrogen and stored over sodium (THF,  $\text{Et}_2\text{O}$ ) or potassium (benzene, toluene) mirrors.  $\text{C}_6\text{D}_6$  (Cambridge Isotope Laboratories) was degassed with argon and stored over potassium mirror.  $\text{CDCl}_3$  and  $\text{CD}_2\text{Cl}_2$  (Cambridge Isotope Laboratories) were distilled from anhydrous  $\text{CaSO}_4$  under argon and stored over 4 Å molecular sieves. *n*-hexane and *n*-pentane (except for air-free chromatography, *vide infra*) were distilled from  $\text{CaH}_2$  under nitrogen and stored over potassium mirrors. Acetonitrile,  $\text{CH}_2\text{Cl}_2$  and  $\text{SiMe}_4$  were distilled from  $\text{CaH}_2$  under nitrogen and stored over 4 Å molecular sieves. Acetone was distilled from anhydrous  $\text{CaSO}_4$  under nitrogen and stored over 4 Å molecular sieves.

The arsoles **1a** ( $\text{PhAsC}_4\text{Ph}_4$ ), **1b** ( $\text{PhAsC}_4\text{Ph}_2\text{H}_2$ ), **1c** ( $\text{PhAsC}_4\text{Me}_4$ ), **1d** ( $\text{PhAsC}_4\text{Et}_4$ ) and **1e** ( $\text{ClAsC}_4(\text{SiMe}_3)_2\text{Me}_2$ ) were synthesised from the corresponding zirconacyclopentadiene in THF (**1a**, **1b**, with catalytic  $\text{CuCl}$ ) or hydrocarbon (**2c**, **2d**, **2e**) solution; spectra were in agreement with those reported.<sup>1</sup> Arsoles **1a** and **1b** are air-stable crystalline yellow solids whilst **1c**, **1d** and **1e** are air-sensitive pale-yellow liquids. The air- and moisture-sensitive As-chloro analogues of **1c** and **1d** were obtained by use of  $\text{AsCl}_3$  instead of  $\text{PhAsCl}_2$ . *Note*:  $\text{ClAsC}_4\text{Me}_4$  gradually decomposes at ambient temperature and should ideally be used the same day as it is prepared. It is thus advisable to carry out addition of  $\text{AsCl}_3$  to  $\text{Cp}_2\text{ZrC}_4\text{Me}_4$  in hydrocarbon solution at  $-40$  °C and perform workup in a timely manner. This decomposition was not observed for  $\text{ClAsC}_4\text{Et}_4$  and  $\text{ClAsC}_4(\text{SiMe}_3)_2\text{Me}_2$  and these could be stored at  $-30$  °C for several weeks without noticeable diminution in quality. The known As-chloro analogue of **1a**<sup>2</sup> was prepared by a new method from  $\text{Bu}_2\text{SnC}_4\text{Ph}_4$  (itself prepared from the zirconacyclopentadiene and  $\text{Bu}_2\text{SnCl}_2$  with catalytic  $\text{CuCl}$  in THF, isolated as a reasonably air-, moisture-, and alumina-stable viscous yellow liquid) and stoichiometric  $\text{AsCl}_3$  in *n*-hexane solution over 48 h from which the product precipitates in good yield as a yellow solid – is it indefinitely stable under inert atmosphere at ambient temperature though it is rather air- and moisture-sensitive. Spectroscopic data for  $\text{ClAsC}_4\text{Ph}_4$ : NMR ( $\text{CDCl}_3$ , 25 °C),  $^1\text{H}$  (400 MHz)  $\delta$  7.19–7.15 (m, 10H,  $\text{C}_6\text{H}_5$ ), 7.10–7.04 (m, 6H,  $\text{C}_6\text{H}_5$ ), 6.88–6.85 (m, 4H,  $\text{C}_6\text{H}_5$ );  $^{13}\text{C}\{^1\text{H}\}$  (176 MHz)  $\delta$  152.0 ( $\text{C}_\alpha$ ), 149.5 ( $\text{C}_\beta$ ), 139.2 ( $\text{C}_\gamma$ ), 137.1 ( $\text{C}_\delta$ ), 129.9 ( $\text{C}_\epsilon$ ), 129.4 ( $\text{C}_\zeta$ ), 128.4 ( $\text{C}_\eta$ ), 128.0 ( $\text{C}_\theta$ ), 127.5 ( $\text{C}_\iota$ ), 127.4 ( $\text{C}_\kappa$ ) – some aromatic  $^{13}\text{C}$  resonances appear to be isochronous hence fewer signals are observed than expected; HR-MS (EI, MeCN) found  $m/z$  466.0462 (calc. for  $\text{C}_{28}\text{H}_{20}^{75}\text{As}^{35}\text{Cl}_1$  [ $M$ ]<sup>+</sup>: 466.0469). The crystal structure of  $\text{ClAsC}_4\text{Ph}_4$  has been determined and will be reported separately in a forthcoming article.  $\text{Au}(\text{C}_6\text{F}_5)(\text{THT})$  and  $\text{Pt}(\text{C}_6\text{F}_5)_2(\eta^4\text{-C}_6\text{H}_{10})$  were prepared from  $\text{AuCl}(\text{THT})$  and  $\text{PtCl}_2(\eta^4\text{-C}_6\text{H}_{10})$  by addition of  $\text{Li}[\text{C}_6\text{F}_5]$  in  $\text{Et}_2\text{O}$  (slight excess, prepared *in-situ* from  $\text{C}_6\text{F}_5\text{Br}$  and *n*-BuLi) at  $-78$  °C and purified by flash chromatography (neutral alumina,  $\text{Et}_2\text{O}$ ) and re-crystallisation from  $\text{Et}_2\text{O}/n$ -hexane as white (Au) or cream (Pt) solids; both are air- and moisture-stable ( $^{19}\text{F}\{^1\text{H}\}$  (376 MHz),

CDCl<sub>3</sub>, 25 °C: Au(C<sub>6</sub>F<sub>5</sub>)(THT) δ -116.1 (m, 2F), -159.6 (m, 1F), -162.4 (m, 2F); Pt(C<sub>6</sub>F<sub>5</sub>)<sub>2</sub>(η<sup>4</sup>-C<sub>6</sub>H<sub>10</sub>) δ -120.4 (m, 2F), -160.2 (m, 1F), -165.3 (m, 2F). PhAsCl<sub>2</sub> was prepared by addition of PhMgCl (2 M in Et<sub>2</sub>O) to AsCl<sub>3</sub> (caution – vesicant and poison) in Et<sub>2</sub>O at 0 °C and purified by short-path vacuum distillation, isolated as an air-sensitive colourless liquid (caution – vesicant and poison). Other reagents were obtained from commercial suppliers and used without further purification: Cp<sub>2</sub>ZrCl<sub>2</sub> and Co<sub>2</sub>(CO)<sub>8</sub> (Strem); phenylacetylene, 2-butyne and 3-hexyne (Alfa Aesar); diphenylacetylene, 1-(trimethylsilyl)prop-1-yne, anhydrous HgCl<sub>2</sub>, AsCl<sub>3</sub>, Bu<sub>2</sub>SnCl<sub>2</sub> and P(OMe)<sub>3</sub> (Sigma Aldrich).

General procedure for anaerobic chromatography: Silica gel (230–400 mesh; Merck), neutral alumina (activity I, 70–230 mesh; Merck) and Florisil® (magnesium silicate, 60-100 mesh; Merck) were permanently stored in a 100 °C oven; *n*-pentane for chromatography need not be stringently anhydrous for the work below, and permanent storage over 4 Å molecular sieves or sodium wire was sufficient – it should, however, be thoroughly degassed with nitrogen prior to use. Anaerobic chromatography was carried out in either 40 x 2.5 cm or 30 x 1 cm water-jacketed (water temp. typically ca. 8–10 °C) Schlenk columns with 250 mL or 100 mL reservoir bulbs, respectively. Columns were charged with the desired quantity of oven-dried chromatography material and the entire apparatus held under vacuum for 30 minutes (twice), before being flushed with a gentle flow of nitrogen for 15–30 minutes. Degassed *n*-pentane is then admitted *via* cannula and allowed to run down the column under a positive pressure of nitrogen until the solid phase is sufficiently packed (gentle and careful external agitation of the apparatus may be required to help material settle). Following this, the mixture to be chromatographed is added *via* syringe to the column. Alternatively, the mixture to be chromatographed may be adsorbed onto a small amount of oven-dried silica gel/alumina/Florisil® by evaporation of solvent, and this material can be transferred to the top of the column under gentle counter-flow of nitrogen. The procedure commences under a slight positive pressure of nitrogen with the external water jacket in current. Eluent mixtures are prepared in a separate 100 mL or 250 mL Schlenk flask under nitrogen by means of volumetric syringes and proportions given herein are therefore only approximate. Collection of bands/fractions from the column is achieved by exchanging receiving Schlenk flasks under stream of nitrogen by careful manipulation of the apparatus – the receiving flask is connected to a three-way tap leading to a supply of nitrogen and exiting to an oil bubbler. Caution – the solid phase for chromatography is likely contaminated with arsenic and should be disposed of appropriately.

## 2. Computational Details

Computational studies were performed by using the SPARTAN20® suite of programs.<sup>3</sup> Geometry optimisation (gas phase) was performed at the DFT level of theory using the exchange functional (ωB97X-D) of Head-Gordon.<sup>4</sup> The Los Alamos effective core potential type basis set (LANL2Dζ) of Hay and Wadt<sup>5</sup> was used for Hg, Pt and Au; the Pople 6-31G\* basis sets<sup>6</sup> were used for all other atoms. Geometry

optimisations were performed at the ωB97X-D/6-31G\*/LANL2Dζ level and frequency calculations were performed to confirm that the optimized structures were minima and to identify vibrational modes of interest.

The singular vibrational scaling factor for the ωBP97X-D/6-31G\* combination is given as 0.949 by the National Institute of Standards and Technology (NIST). Thermodynamic properties provided are based on 0.942 as implemented in *Spartan20*. For complexes of the form encountered here, comparison of data in the νCO region of the infrared spectrum with experimentally determined data, a dual scaling factor (ν > 1800 cm<sup>-1</sup>: 0.9382) based on measured and calculated frequencies for the A' mode of Co(CO)<sub>2</sub>(η<sup>5</sup>-C<sub>5</sub>H<sub>5</sub>) is more prudent.

### 2.1 Co(CO)<sub>2</sub>(η<sup>5</sup>-C<sub>5</sub>H<sub>4</sub>) (2'<sub>CH</sub>)

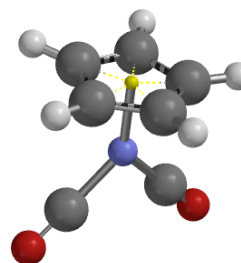

Figure S1. Optimised geometry for 2'<sub>CH</sub> (ωB97X-D/6-31G\*/LANL2Dζ)

Table S1. Cartesian Coordinates for Co(CO)<sub>2</sub>(η<sup>5</sup>-AsC<sub>4</sub>H<sub>4</sub>) (2'<sub>As</sub>)

| Atom | x         | y         | z         |
|------|-----------|-----------|-----------|
| Co   | 0.006427  | -0.003356 | 0.828018  |
| H    | 2.280452  | -0.309540 | -1.007189 |
| C    | 1.209109  | -0.156541 | -0.871347 |
| C    | 0.534560  | 1.133077  | -0.895257 |
| H    | 0.412767  | -2.280170 | -1.082649 |
| C    | -0.893015 | 0.851358  | -0.850291 |
| H    | -1.684917 | 1.592318  | -0.967668 |
| C    | -1.094414 | -0.600434 | -0.907309 |
| H    | -2.053891 | -1.097393 | -1.058739 |
| C    | 0.202238  | -1.222057 | -0.919938 |
| C    | -1.128456 | 0.540352  | 2.045034  |
| O    | -1.897730 | 0.917878  | 2.831517  |
| C    | 1.159815  | -0.558812 | 2.022195  |
| O    | 1.947431  | -0.930486 | 2.793191  |
| H    | 0.999102  | 2.104206  | -1.064948 |

### Thermodynamic properties (298.15 K, ωB97X-D/6-31G\*/LANL2Dζ)

Zero Point Energy : 254.64 kJmol<sup>-1</sup> (ZPE)  
 Temperature Correction: 24.54 kJmol<sup>-1</sup>  
 (vibration + gas law + rotation + translation)  
 Enthalpy Correction: 279.19 kJmol<sup>-1</sup>  
 (ZPE + temperature correction)  
 Enthalpy: -1802.615551 au  
 (Electronic Energy + Enthalpy Correction)  
 Entropy : 376.46 Jmol<sup>-1</sup>K<sup>-1</sup>

Gibbs Energy: -1802.658301 au (Enthalpy - T\*Entropy)  
 Cv: 147.38 Jmol<sup>-1</sup>K<sup>-1</sup>

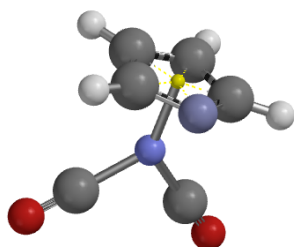

## 2.2 Co(CO)<sub>2</sub>(η<sup>5</sup>-NC<sub>4</sub>H<sub>4</sub>) (2'N)

Figure S2. Optimised geometry for 2'N (ωB97X-D/6-31G\*/LANL2Dζ)

Table S2. Cartesian Coordinates for Co(CO)<sub>2</sub>(η<sup>5</sup>-AsC<sub>4</sub>H<sub>4</sub>) (2'N)

| Atom | x         | y         | z         |
|------|-----------|-----------|-----------|
| Co   | -0.108494 | 0.000000  | 0.724589  |
| H    | -0.971279 | -2.088287 | -0.924218 |
| C    | -0.573783 | -1.081874 | -0.933800 |
| C    | 0.803822  | -0.702385 | -1.021902 |
| H    | 1.654871  | -1.366071 | -1.070855 |
| C    | 0.803822  | 0.702385  | -1.021901 |
| H    | 1.654871  | 1.366071  | -1.070854 |
| C    | -0.573783 | 1.081873  | -0.933800 |
| H    | -0.971279 | 2.088286  | -0.924218 |
| N    | -1.411079 | -0.000000 | -0.941710 |
| C    | -0.050474 | -1.271161 | 1.904052  |
| O    | -0.000862 | -2.130848 | 2.663554  |
| C    | -0.050474 | 1.271161  | 1.904052  |
| O    | -0.000862 | 2.130848  | 2.663553  |

### Thermodynamic properties (298.15 K, ωB97X-D/6-31G\*/LANL2Dζ)

Zero Point Energy: 225.86 kJmol<sup>-1</sup> (ZPE)  
 Temperature Correction: 24.13 kJmol<sup>-1</sup>  
 (vibration + gas law + rotation + translation)  
 Enthalpy Correction: 249.100 kJmol<sup>-1</sup>  
 (ZPE + temperature correction)  
 Enthalpy: -1818.654433 au  
 (Electronic Energy + Enthalpy Correction)  
 Entropy: 374.75 Jmol<sup>-1</sup>K<sup>-1</sup>  
 Gibbs Energy: -1818.696990 au (Enthalpy - T\*Entropy)  
 Cv: 142.31 Jmol<sup>-1</sup>K<sup>-1</sup>

## 2.3 Co(CO)<sub>2</sub>(η<sup>5</sup>-PC<sub>4</sub>H<sub>4</sub>) (2'P)

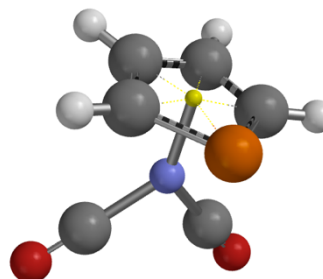

Figure S3. Optimised geometry for 2'P (ωB97X-D/6-31G\*/LANL2Dζ)

Table S3. Cartesian Coordinates for Co(CO)<sub>2</sub>(η<sup>5</sup>-AsC<sub>4</sub>H<sub>4</sub>) (2'As)

| Atom | x         | y         | z         |
|------|-----------|-----------|-----------|
| Co   | -0.203955 | -0.000000 | 0.678107  |
| H    | -0.687785 | -2.289088 | -0.888868 |
| C    | -0.494966 | -1.223579 | -0.945928 |
| C    | 0.833261  | -0.703799 | -0.972040 |
| H    | 1.725777  | -1.317129 | -0.956005 |
| C    | 0.833261  | 0.703799  | -0.972039 |
| H    | 1.725777  | 1.317128  | -0.956005 |
| C    | -0.494966 | 1.223579  | -0.945928 |
| H    | -0.687785 | 2.289088  | -0.888868 |
| P    | -1.779859 | 0.000000  | -1.044497 |
| C    | -0.166645 | -1.281756 | 1.855949  |
| O    | -0.144862 | -2.152290 | 2.603444  |
| C    | -0.166646 | 1.281756  | 1.855949  |
| O    | -0.144863 | 2.152290  | 2.603444  |

### Thermodynamic properties (298.15 K, ωB97X-D/6-31G\*/LANL2Dζ)

Zero Point Energy: 216.36 kJmol<sup>-1</sup> (ZPE)  
 Temperature Correction: 25.38 kJmol<sup>-1</sup>  
 (vibration + gas law + rotation + translation)  
 Enthalpy Correction: 241.74 kJmol<sup>-1</sup>  
 (ZPE + temperature correction)  
 Enthalpy: -2105.272601 au  
 (Electronic Energy + Enthalpy Correction)  
 Entropy: 384.19 Jmol<sup>-1</sup>K<sup>-1</sup>  
 Gibbs Energy: -2105.316229 au (Enthalpy - T\*Entropy)  
 Cv: 151.04 Jmol<sup>-1</sup>K<sup>-1</sup>



## 2.4 $\text{Co}(\text{CO})_2(\eta^5\text{-AsC}_4\text{H}_4)$ ( $2'_{\text{As}}$ )

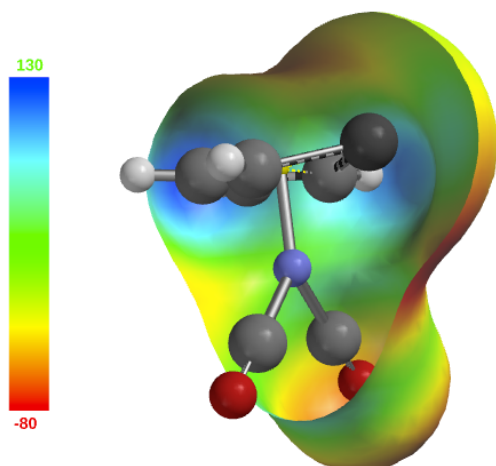

**Figure S4.** Optimised geometry for  $2'_{\text{As}}$  ( $\omega\text{B97X-D/6-31G}^*/\text{LANL2D}\zeta$ ) with electrostatic potential surface.

**Table S4.** Cartesian Coordinates for  $\text{Co}(\text{CO})_2(\eta^5\text{-AsC}_4\text{H}_4)$  ( $2'_{\text{As}}$ )

| Atom | x         | y         | z         |
|------|-----------|-----------|-----------|
| Co   | -0.312453 | -0.000000 | 0.634260  |
| H    | -0.509732 | -2.327633 | -0.951731 |
| C    | -0.346643 | -1.256387 | -1.001630 |
| C    | 0.955365  | -0.705103 | -0.843373 |
| H    | 1.844237  | -1.306180 | -0.691193 |
| C    | 0.955365  | 0.705103  | -0.843373 |
| H    | 1.844237  | 1.306180  | -0.691193 |
| C    | -0.346642 | 1.256387  | -1.001630 |
| H    | -0.509732 | 2.327633  | -0.951731 |
| As   | -1.731476 | 0.000000  | -1.332927 |
| C    | -0.425676 | -1.280204 | 1.808756  |
| O    | -0.495720 | -2.156279 | 2.547009  |
| C    | -0.425676 | 1.280204  | 1.808756  |
| O    | -0.495721 | 2.156279  | 2.547009  |

### Thermodynamic properties (298.15 K, $\omega\text{B97X-D/6-31G}^*/\text{LANL2D}\zeta$ )

Zero Point Energy: 213.44  $\text{kJmol}^{-1}$  (ZPE)  
 Temperature Correction: 26.03  $\text{kJmol}^{-1}$   
 (vibration + gas law + rotation + translation)  
 Enthalpy Correction: 239.47  $\text{kJmol}^{-1}$   
 (ZPE + temperature correction)  
 Enthalpy: -3999.596750 au  
 (Electronic Energy + Enthalpy Correction)  
 Entropy: 394.13  $\text{Jmol}^{-1}\text{K}^{-1}$   
 Gibbs Energy: -3999.641507 au (Enthalpy -  $T^*\text{Entropy}$ )  
 Cv: 154.78  $\text{Jmol}^{-1}\text{K}^{-1}$

**Table S5.** Atomic charges and condensed Fukui indices for  $\text{Co}(\text{CO})_2(\eta^5\text{-AsC}_4\text{H}_4)$  ( $2'_{\text{As}}$ ) and  $[\text{Co}(\text{CO})_2(\eta^5\text{-AsC}_4\text{H}_4)]^+$  ( $2'_{\text{As}}]^+$ )

| Atom                | Mulliken | Natural | $f(\text{Mulliken})$ | $f(\text{Natural})$ |
|---------------------|----------|---------|----------------------|---------------------|
| $2'_{\text{As}}$    |          |         |                      |                     |
| Co                  | 0.076    | 0.806   |                      |                     |
| As                  | 0.142    | 0.579   |                      |                     |
| $2'_{\text{As}}]^+$ |          |         |                      |                     |
| Co                  | 0.216    | 0.919   | 0.140                | 0.113               |
| As                  | 0.366    | 0.830   | 0.224                | 0.251               |

## 2.5 $\text{Co}(\text{CO})_2(\eta^5\text{-SbC}_4\text{H}_4)$ ( $2'_{\text{Sb}}$ )

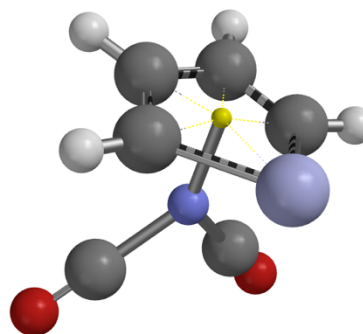

**Figure S5.** Optimised geometry for  $2'_{\text{Sb}}$  ( $\omega\text{B97X-D/6-31G}^*/\text{LANL2D}\zeta$ )

**Table S6.** Cartesian Coordinates for  $\text{Co}(\text{CO})_2(\eta^5\text{-SbC}_4\text{H}_4)$  ( $2'_{\text{Sb}}$ )

| Atom | x         | y         | z         |
|------|-----------|-----------|-----------|
| Co   | -0.303012 | 0.000892  | 0.623747  |
| H    | -0.417529 | -2.383759 | -0.900860 |
| C    | -0.325480 | -1.305736 | -0.988406 |
| C    | 0.954492  | -0.705879 | -0.853919 |
| H    | 1.859496  | -1.282840 | -0.695149 |
| C    | 0.953880  | 0.707765  | -0.854387 |
| H    | 1.858850  | 1.284606  | -0.694972 |
| C    | -0.326598 | 1.305080  | -0.991299 |
| H    | -0.422831 | 2.382845  | -0.905798 |
| Sb   | -1.918670 | -0.001351 | -1.399199 |
| C    | -0.417470 | -1.285372 | 1.794989  |
| O    | -0.497208 | -2.159073 | 2.535243  |
| C    | -0.413396 | 1.285509  | 1.797281  |
| O    | -0.489592 | 2.157375  | 2.540010  |

### Thermodynamic properties (298.15 K, $\omega\text{B97X-D/6-31G}^*/\text{LANL2D}\zeta$ )

Zero Point Energy: 211.22  $\text{kJmol}^{-1}$  (ZPE)  
 Temperature Correction: 26.51  $\text{kJmol}^{-1}$   
 (vibration + gas law + rotation + translation)  
 Enthalpy Correction: 237.73  $\text{kJmol}^{-1}$   
 (ZPE + temperature correction)  
 Enthalpy: -1769.337270 au  
 (Electronic Energy + Enthalpy Correction)  
 Entropy: 401.29  $\text{Jmol}^{-1}\text{K}^{-1}$   
 Gibbs Energy: -1769.382840 au (Enthalpy -  $T^*\text{Entropy}$ )  
 Cv: 157.18  $\text{Jmol}^{-1}\text{K}^{-1}$

**Table S6.** Calculated Natural Atomic Charges and Infrared Data<sup>a</sup> for  $[\text{Co}(\text{CO})_2(\eta^5\text{-AC}_4\text{H}_4)]^+$  ( $2'_A$ )

| A =           | Charge (A)          | Charge (Co) | $\nu_{\text{CO}}(\text{A}')$ | $\nu_{\text{CO}}(\text{A}'')$ | $k_{\text{CO}}$ |
|---------------|---------------------|-------------|------------------------------|-------------------------------|-----------------|
| $\text{CH}^b$ |                     |             | 2033                         | 1972                          | 16.17           |
| CH            | -0.374 <sup>c</sup> | 0.821       | 2033                         | 1989                          | 16.31           |
| N             | -0.517              | 0.816       | 2047                         | 2003                          | 16.54           |
| P             | 0.530               | 0.807       | 2048                         | 2009                          | 16.59           |
| As            | 0.579               | 0.806       | 2043                         | 2007                          | 16.54           |
| Sb            | 0.766               | 0.796       | 2041                         | 2007                          | 16.52           |

<sup>a</sup> $\omega\text{B97X-D/6-31G}^*/\text{gas phase}$ ; scaling factor 0.9382. <sup>b</sup>Experimental data from cyclohexane solution.<sup>17b)</sup> <sup>c</sup>Charge on carbon (charge on H = 0.275).

### Observations

- (i) The *net* donicity towards cobalt of the  $\eta^5\text{-AsC}_4\text{H}_4$  ligand is somewhat invariant across the series, as inferred from both the natural charges on cobalt and the  $\nu_{\text{CO}}$  values
- (ii) Within the rings, the pyrrolyl ligand is anomalous in that the high electronegativity of nitrogen polarises the C–N bonds resulting in a large negative natural charge on nitrogen and a decrease in the negative charge on the  $\alpha$ -carbons (-0.158).
- (iii) The significant increase in charge on moving from A = As to A = Sb is noteworthy (Bi is not implemented at this level of theory) making such compounds of interest for isolation and further studies.

### 2.6 $\text{Co}(\text{CO})_2(\eta^5\text{-AsC}_4\text{Me}_4)$ (**2c**)

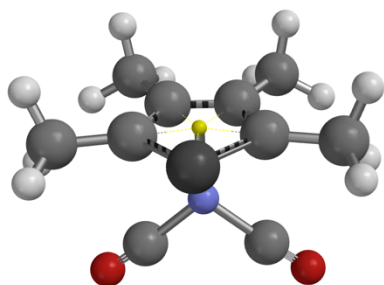

Figure S6. Optimised geometry for **2c** ( $\omega\text{B97X-D/6-31G}^*/\text{LANL2D}\zeta$ )

Table S7. Cartesian Coordinates for  $\text{Co}(\text{CO})_2(\eta^5\text{-AsC}_4\text{Me}_4)$  (**2c**)

| Atom | x         | y         | z         |
|------|-----------|-----------|-----------|
| Co   | -0.663811 | -0.000146 | 1.094550  |
| C    | -0.827312 | -1.271121 | -0.534552 |
| C    | 0.486981  | -0.711134 | -0.477098 |
| C    | 0.486603  | 0.711508  | -0.477719 |
| C    | -0.827615 | 1.272033  | -0.533521 |
| As   | -2.219568 | 0.000483  | -0.771228 |
| C    | -0.677199 | -1.289701 | 2.260238  |
| O    | -0.668757 | -2.180739 | 2.986893  |
| C    | -0.677369 | 1.287597  | 2.262118  |
| O    | -0.669191 | 2.177699  | 2.989893  |
| C    | -1.078420 | 2.758028  | -0.539355 |
| H    | -0.520555 | 3.282956  | 0.243474  |
| H    | -2.138164 | 2.981865  | -0.390344 |
| H    | -0.776911 | 3.184626  | -1.503020 |
| Atom | x         | y         | z         |
| C    | 1.733156  | 1.552432  | -0.465722 |
| H    | 2.553262  | 1.063954  | 0.065690  |
| H    | 1.559635  | 2.518994  | 0.013584  |
| H    | 2.065266  | 1.747178  | -1.492769 |
| C    | 1.733605  | -1.552240 | -0.461647 |
| H    | 2.552128  | -1.064187 | 0.072502  |
| H    | 2.068406  | -1.746920 | -1.487835 |
| H    | 1.559086  | -2.518937 | 0.017046  |
| C    | -1.078391 | -2.757151 | -0.539817 |
| H    | -0.521926 | -3.281733 | 0.244246  |
| H    | -0.775726 | -3.184556 | -1.502726 |
| H    | -2.138414 | -2.980777 | -0.392362 |

### Thermodynamic properties (298.15 K, $\omega\text{B97X-D/6-31G}^*/\text{LANL2D}\zeta$ ):

Zero Point Energy: 491.30kJmol<sup>-1</sup> (ZPE)  
 Temperature Correction: 40.96 kJmol<sup>-1</sup>  
 (vibration + gas law + rotation + translation)  
 Enthalpy Correction: 532.25 kJmol<sup>-1</sup>  
 (ZPE + temperature correction)  
 Enthalpy: -4156.718029 au  
 (Electronic Energy + Enthalpy Correction)  
 Entropy: 495.64Jmol<sup>-1</sup>K<sup>-1</sup>  
 Gibbs Energy: -4156.774313 au  
 (Enthalpy - T\*Entropy)  
 Cv: 258.58Jmol<sup>-1</sup>K<sup>-1</sup>

### 2.7 $[\{\text{Co}(\text{CO})_2(\eta^5\text{-AsC}_4\text{H}_4)\}\text{Pt}(\text{CO})(\text{CF}_3)_2]$ (**4'**)

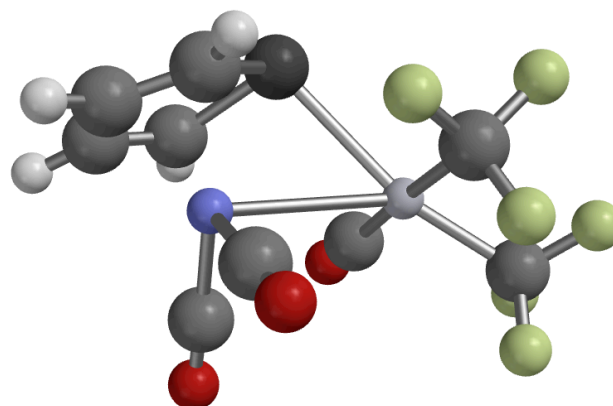

Figure S7. Optimised geometry for **4'** ( $\omega\text{B97X-D/6-31G}^*/\text{LANL2D}\zeta$ )

Table S8. Cartesian Coordinates for  $[\{\text{Co}(\text{CO})_2(\eta^5\text{-AsC}_4\text{H}_4)\}\text{Pt}(\text{CO})(\text{CF}_3)_2]$  (**4'**)

| Atom | x         | y         | z         |
|------|-----------|-----------|-----------|
| Pt   | -0.616890 | -0.152698 | 1.397446  |
| As   | 1.507251  | 1.244471  | 0.595875  |
| Co   | 0.674390  | -0.192740 | -1.253926 |
| O    | 1.181653  | -2.538751 | 2.183295  |
| O    | -1.945699 | 0.239003  | -2.440507 |
| C    | 2.679830  | 0.086139  | -1.689938 |
| C    | 0.536144  | -1.945969 | -1.302839 |
| O    | 0.485412  | -3.087673 | -1.338622 |
| C    | 1.923889  | 1.175983  | -2.190697 |
| C    | 0.506576  | -1.667799 | 1.893920  |
| C    | 1.140072  | 1.800569  | -1.202007 |
| C    | 2.504994  | -0.122155 | -0.305438 |
| C    | -0.931086 | 0.064899  | -1.951633 |
| H    | 2.976623  | -0.958640 | 0.198943  |
| H    | 3.283944  | -0.555021 | -2.322437 |
| H    | 1.900408  | 1.450049  | -3.239458 |
| H    | 0.449770  | 2.600196  | -1.434964 |
| C    | -1.869697 | 1.435317  | 0.995672  |
| C    | -2.171320 | -0.948002 | 2.480018  |
| F    | -1.441798 | 2.259601  | -0.023462 |
| F    | -3.121603 | 1.084126  | 0.634784  |
| F    | -1.985933 | 2.255460  | 2.062994  |
| F    | -2.832888 | -0.065561 | 3.245814  |
| F    | -3.083576 | -1.532698 | 1.675743  |
| F    | -1.750468 | -1.928107 | 3.331423  |

**Thermodynamic properties (298.15 K, ωB97X-D/6-31G\*/LANL2Dz)**

Zero Point Energy: 306.68 kJmol<sup>-1</sup> (ZPE)  
 Temperature Correction : 52.72 kJmol<sup>-1</sup>  
 (vibration + gas law + rotation + translation)  
 Enthalpy Correction: 359.40 kJmol<sup>-1</sup>  
 (ZPE + temperature correction)  
 Enthalpy: -4907.134806 au  
 (Electronic Energy + Enthalpy Correction)  
 Entropy: 584.18 Jmol<sup>-1</sup>K<sup>-1</sup>  
 Gibbs Energy: -4907.201145 au (Enthalpy - T\*Entropy)  
 Cv : 342.92 Jmol<sup>-1</sup>K<sup>-1</sup>

**2.8 [{Co(CO)<sub>2</sub>(η<sup>5</sup>-AsC<sub>4</sub>Me<sub>4</sub>)Pt(CO)(CF<sub>3</sub>)<sub>2</sub>] (4<sup>''</sup>)**

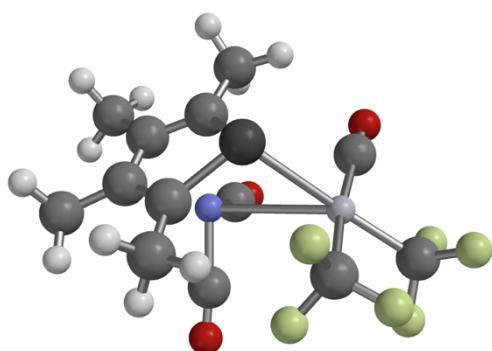

**Figure S8.** Optimised geometry for 4<sup>''</sup> (ωB97X-D/6-31G\*/LANL2Dz)

**Table S9.** Cartesian Coordinates for [{Co(CO)<sub>2</sub>(η<sup>5</sup>-AsC<sub>4</sub>Me<sub>4</sub>)Pt(CO)(CF<sub>3</sub>)<sub>2</sub>] (4<sup>''</sup>)

| Atom | x         | y         | z         |
|------|-----------|-----------|-----------|
| Pt   | -1.348825 | -0.370678 | 2.130822  |
| As   | 0.775567  | 0.961807  | 1.236657  |
| Co   | -0.104981 | -0.443168 | -0.611271 |
| O    | 0.143054  | -2.989000 | 2.773076  |
| O    | -2.697031 | -0.053062 | -1.856409 |
| C    | 1.895095  | -0.136212 | -1.098496 |
| C    | -0.195032 | -2.191259 | -0.656452 |
| O    | -0.182750 | -3.335946 | -0.706224 |
| C    | 1.102554  | 0.962629  | -1.556759 |
| C    | -0.400101 | -2.023238 | 2.504479  |
| C    | 0.325561  | 1.573509  | -0.541096 |
| C    | 1.765674  | -0.384386 | 0.288288  |
| C    | -1.699645 | -0.212750 | -1.323604 |
| C    | -2.416075 | 1.382567  | 1.938298  |
| C    | -3.021931 | -1.187441 | 2.995700  |
| F    | -1.609437 | 2.489894  | 2.112828  |
| F    | -2.963554 | 1.543905  | 0.699714  |
| F    | -3.423869 | 1.573090  | 2.807392  |
| F    | -4.135387 | -0.958910 | 2.270591  |
| F    | -2.936921 | -2.547731 | 3.098293  |
| F    | -3.263648 | -0.743791 | 4.242416  |
| C    | 2.537850  | -1.468600 | 0.990739  |
| H    | 3.612405  | -1.278710 | 0.892323  |
| H    | 2.339124  | -2.465089 | 0.581914  |
| H    | 2.310234  | -1.499629 | 2.057862  |
| C    | 1.109933  | 1.427712  | -2.985768 |
| H    | 1.994920  | 2.047974  | -3.170658 |
| H    | 0.229005  | 2.028880  | -3.217325 |
| H    | 1.136689  | 0.590077  | -3.686808 |

| Atom | x         | y         | z         |
|------|-----------|-----------|-----------|
| C    | -0.541436 | 2.771903  | -0.821381 |
| H    | 0.090465  | 3.603063  | -1.154742 |
| H    | -1.089585 | 3.089775  | 0.062041  |
| H    | -1.275647 | 2.572987  | -1.608663 |
| C    | 2.800315  | -0.930813 | -1.997614 |
| H    | 3.761589  | -0.414760 | -2.106005 |
| H    | 2.375836  | -1.061022 | -2.995703 |
| H    | 2.999983  | -1.923574 | -1.588454 |

**Thermodynamic properties (298.15 K, ωB97X-D/6-31G\*/LANL2Dz):**

Zero Point Energy: 586.78 kJmol<sup>-1</sup> (ZPE)  
 Temperature Correction: 67.38 kJmol<sup>-1</sup>  
 (vibration + gas law + rotation + translation)  
 Enthalpy Correction: 654.16 kJmol<sup>-1</sup>  
 (ZPE + temperature correction)  
 Enthalpy: -5064.262558 au  
 (Electronic Energy + Enthalpy Correction)  
 Entropy: 679.22 Jmol<sup>-1</sup>K<sup>-1</sup>  
 Gibbs Energy: -5064.339689 au (Enthalpy - T\*Entropy)  
 Cv: 445.48 Jmol<sup>-1</sup>K<sup>-1</sup>

**Table S10.** Comparison of Infrared Data for [{Co(CO)<sub>2</sub>(η<sup>5</sup>-AsC<sub>4</sub>H<sub>4</sub>)Pt(CO)(CF<sub>3</sub>)<sub>2</sub>] (4<sup>'</sup>) and [{Co(CO)<sub>2</sub>(η<sup>5</sup>-AsC<sub>4</sub>Me<sub>4</sub>)Pt(CO)(R)<sub>2</sub>] (R = C<sub>6</sub>F<sub>5</sub> 4, CF<sub>3</sub> 4<sup>''</sup>)

| Complex                                                                                                                         | vCO [cm <sup>-1</sup> ]                |
|---------------------------------------------------------------------------------------------------------------------------------|----------------------------------------|
| [Co(CO) <sub>2</sub> (η <sup>5</sup> -AsC <sub>4</sub> H <sub>4</sub> )Pt(CO)(CF <sub>3</sub> ) <sub>2</sub> ] 4 <sup>'</sup>   | Calculated <sup>a</sup> 2040 2067 2080 |
|                                                                                                                                 | Uncorrected 2174 2204 2218             |
| [Co(CO) <sub>2</sub> (η <sup>5</sup> -AsCMe <sub>4</sub> )Pt(CO)(CF <sub>3</sub> ) <sub>2</sub> ] 4 <sup>'</sup>                | Calculated <sup>a</sup> 2021 2057 2073 |
|                                                                                                                                 | Uncorrected 2155 2193 2210             |
| [Co(CO) <sub>2</sub> (η <sup>5</sup> -AsC <sub>4</sub> Me <sub>4</sub> )Pt(CO)(C <sub>6</sub> F <sub>5</sub> ) <sub>2</sub> ] 4 | Measured <sup>b</sup> 2014 2053 2084   |

<sup>a</sup>ωB97X-D/6-31G\*/LANL2Dz/gas phase, scaling factor 0.9382. <sup>b</sup>CH<sub>2</sub>Cl<sub>2</sub> solution.

**Table S11.** Comparison of Geometrical Data for [{Co(CO)<sub>2</sub>(η<sup>5</sup>-AsC<sub>4</sub>H<sub>4</sub>)Pt(CO)(CF<sub>3</sub>)<sub>2</sub>] (4<sup>'</sup>) and [{Co(CO)<sub>2</sub>(η<sup>5</sup>-AsC<sub>4</sub>Me<sub>4</sub>)Pt(CO)(R)<sub>2</sub>] (R = C<sub>6</sub>F<sub>5</sub> 4, CF<sub>3</sub> 4<sup>''</sup>)

| Complex           | Co-Pt [Å] | Co-As [Å] | Pt-As [Å] | Pt-C <sub>trans</sub> [Å] | Pt-C <sub>cis</sub> [Å] | As-Pt-Co [°] |
|-------------------|-----------|-----------|-----------|---------------------------|-------------------------|--------------|
| 4 <sup>'a</sup>   | 2.949     | 2.486     | 2.666     | 2.054                     | 2.062                   | 52.26        |
| 4 <sup>'''a</sup> | 3.012     | 2.483     | 2.662     | 2.053                     | 2.062                   | 51.45        |
| 4 <sup>b</sup>    | 2.996     | 2.499     | 2.516     | 2.077                     | 2.053                   | 53.04        |

<sup>a</sup>ωB97X-D/6-31G\*/LANL2Dz/gas phase. <sup>b</sup>X-ray diffraction.

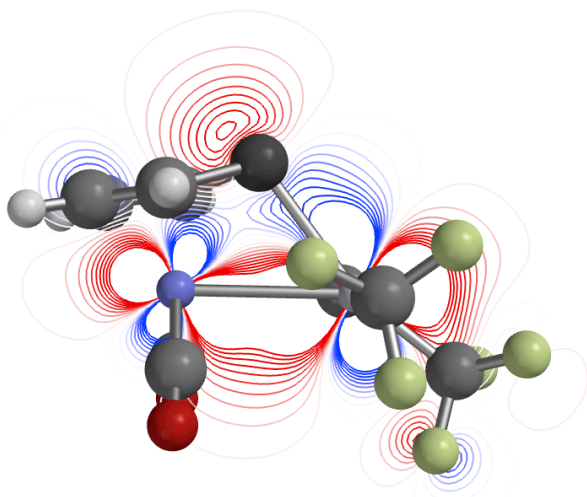

**Figure S9.** Topology of HOMO-7 for **4'** ( $\omega$ B97X-D/6-31G\*/LANL2Dz) consistent with Co-Pt  $\sigma$ -bonding.

## 2.9 $[\{\text{Co}(\text{CO})_2(\eta^5\text{-AsC}_4\text{H}_4)\}_2\text{Au}]^+$ (**5'**)

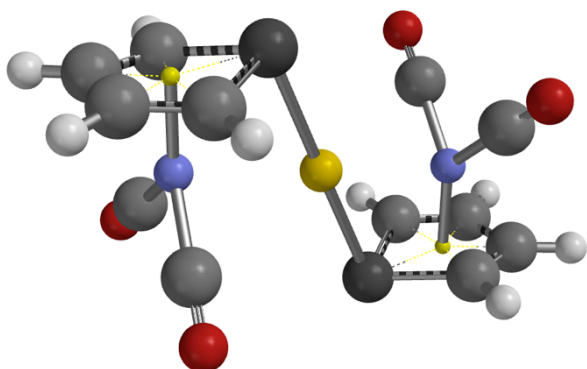

**Figure S10.** Optimised geometry for **5'** ( $\omega$ B97X-D/6-31G\*/LANL2Dz)

**Table S12.** Cartesian Coordinates for  $[\{\text{Co}(\text{CO})_2(\eta^5\text{-AsC}_4\text{H}_4)\}_2\text{Au}]^+$  (**5'**)

| Atom | x         | y         | z         |
|------|-----------|-----------|-----------|
| Co   | -0.187757 | -0.034150 | 2.705172  |
| H    | 1.366466  | -2.394746 | 2.726482  |
| C    | 1.406843  | -1.322908 | 2.884705  |
| C    | 1.116700  | -0.747622 | 4.140426  |
| H    | 0.844412  | -1.325906 | 5.016223  |
| C    | 1.142936  | 0.669357  | 4.122944  |
| H    | 0.891654  | 1.278305  | 4.984082  |
| C    | 1.453568  | 1.202711  | 2.853946  |
| H    | 1.451704  | 2.271086  | 2.669668  |
| As   | 2.062209  | -0.086685 | 1.575317  |
| Au   | 0.001947  | -0.059929 | 0.000097  |
| C    | -1.364464 | 1.283019  | 2.588486  |
| O    | -2.104957 | 2.147308  | 2.522648  |
| C    | -1.408250 | -1.312890 | 2.618702  |
| O    | -2.178330 | -2.152188 | 2.574741  |
| Co   | 0.190535  | 0.043653  | -2.703914 |
| H    | -1.312410 | -2.347986 | -2.794882 |
| C    | -1.375396 | -1.273032 | -2.921043 |
| C    | -1.099030 | -0.654809 | -4.159289 |
| H    | -0.815299 | -1.200981 | -5.051895 |

| Atom | x         | y         | z         |
|------|-----------|-----------|-----------|
| C    | -1.156841 | 0.760111  | -4.100318 |
| H    | -0.919758 | 1.399448  | -4.943236 |
| C    | -1.477495 | 1.248505  | -2.815870 |
| H    | -1.499180 | 2.310720  | -2.599892 |
| As   | -2.057362 | -0.090878 | -1.575996 |
| C    | 1.336712  | 1.383918  | -2.552139 |
| O    | 2.048454  | 2.270421  | -2.467780 |
| C    | 1.433469  | -1.214250 | -2.655753 |
| O    | 2.208920  | -2.049602 | -2.641632 |

## Thermodynamic properties (298.15 K, $\omega$ B97X-D/6-31G\*/LANL2Dz):

Zero Point Energy: 433.25 kJmol<sup>-1</sup> (ZPE)

Temperature Correction: 53.34 kJmol<sup>-1</sup>  
(vibration + gas law + rotation + translation)

Enthalpy Correction: 486.58 kJmol<sup>-1</sup>

(ZPE + temperature correction)

Enthalpy: -8134.527779 au  
(Electronic Energy + Enthalpy Correction)

Entropy: 590.58 Jmol<sup>-1</sup>K<sup>-1</sup>

Gibbs Energy: -8134.594845 au (Enthalpy - T\*Entropy)

Cv: 357.97 Jmol<sup>-1</sup>K<sup>-1</sup>

## 2.10 $[\{\text{Co}(\text{CO})_2(\eta^5\text{-AsC}_4\text{Me}_4)\}_2\text{Au}]^+$ (**5''**)

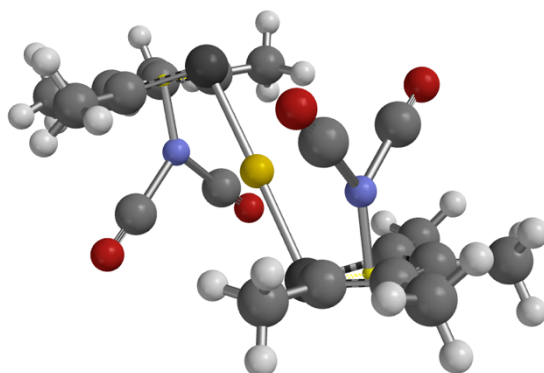

**Figure S11.** Optimised geometry for **5''** ( $\omega$ B97X-D/6-31G\*/LANL2Dz)

**Table S13.** Cartesian Coordinates for  $[\{\text{Co}(\text{CO})_2(\eta^5\text{-AsC}_4\text{Me}_4)\}_2\text{Au}]^+$  (**5''**)

| Atom | x         | y         | z         |
|------|-----------|-----------|-----------|
| Co   | -2.708384 | 0.257810  | -0.049812 |
| C    | -2.949408 | -1.301648 | -1.378892 |
| C    | -4.189964 | -1.022441 | -0.750221 |
| C    | -4.128316 | -1.075512 | 0.680411  |
| C    | -2.839348 | -1.397283 | 1.177605  |
| As   | -1.621957 | -1.998491 | -0.179445 |
| Au   | 0.001054  | 0.006477  | -0.148759 |
| C    | -2.531481 | 1.393550  | 1.286482  |
| O    | -2.430486 | 2.099355  | 2.179681  |
| C    | -2.645814 | 1.486952  | -1.311513 |
| O    | -2.625342 | 2.252957  | -2.158920 |
| Co   | 2.707283  | -0.256204 | 0.035302  |
| C    | 2.990069  | 1.276000  | -1.315937 |
| C    | 4.212593  | 1.005549  | -0.648691 |
| C    | 4.113556  | 1.085230  | 0.778708  |

| Atom | x         | y         | z         |
|------|-----------|-----------|-----------|
| C    | 2.812379  | 1.418070  | 1.236580  |
| As   | 1.634603  | 2.002028  | -0.164978 |
| C    | 2.482573  | -1.363856 | 1.387694  |
| O    | 2.345944  | -2.050653 | 2.290933  |
| C    | 2.675086  | -1.510618 | -1.202260 |
| O    | 2.671704  | -2.294611 | -2.033306 |
| C    | 5.498921  | 0.677114  | -1.352009 |
| H    | 6.037383  | -0.137312 | -0.861462 |
| H    | 6.150842  | 1.558178  | -1.349246 |
| H    | 5.332143  | 0.392604  | -2.392114 |
| C    | 2.819257  | 1.243767  | -2.810250 |
| H    | 3.315406  | 0.384893  | -3.272120 |
| H    | 3.244448  | 2.150633  | -3.253577 |
| H    | 1.762053  | 1.200685  | -3.086024 |
| C    | 5.285636  | 0.848595  | 1.687866  |
| H    | 5.895713  | 0.004499  | 1.358187  |
| H    | 4.971505  | 0.656345  | 2.715048  |
| H    | 5.924768  | 1.738922  | 1.697686  |
| C    | 2.432922  | 1.547578  | 2.686878  |
| H    | 2.846911  | 0.743455  | 3.302661  |
| H    | 1.346817  | 1.534004  | 2.813713  |
| H    | 2.804949  | 2.496714  | 3.087471  |
| C    | -2.739125 | -1.294736 | -2.868376 |
| H    | -3.157360 | -2.206640 | -3.307988 |
| H    | -1.674864 | -1.261048 | -3.116987 |
| H    | -3.218381 | -0.440640 | -3.356519 |
| C    | -5.458949 | -0.712567 | -1.492723 |
| H    | -6.111259 | -1.593241 | -1.481895 |
| H    | -5.267410 | -0.456360 | -2.535887 |
| H    | -6.008087 | 0.114539  | -1.036543 |
| C    | -5.328386 | -0.822101 | 1.547757  |
| H    | -5.978471 | -1.704464 | 1.537144  |
| H    | -5.915605 | 0.028664  | 1.194050  |
| H    | -5.048080 | -0.631112 | 2.584784  |
| C    | -2.501637 | -1.492101 | 2.640644  |
| H    | -2.887617 | -2.430416 | 3.053334  |
| H    | -2.931027 | -0.671384 | 3.223469  |
| H    | -1.419640 | -1.477091 | 2.798600  |

**Thermodynamic properties (298.15 K,  $\omega$ B97X-D/6-31G\*/LANL2Dz):**

Zero Point Energy: 990.01 kJmol<sup>-1</sup> (ZPE)  
 Temperature Correction: 82.94 kJmol<sup>-1</sup>  
 (vibration + gas law + rotation + translation)  
 Enthalpy Correction: 1072.95 kJmol<sup>-1</sup>  
 (ZPE + temperature correction)  
 Enthalpy: -8448.795549 au  
 (Electronic Energy + Enthalpy Correction)  
 Entropy: 781.23 Jmol<sup>-1</sup>K<sup>-1</sup>  
 Gibbs Energy: -8448.884265 au (Enthalpy - T\*Entropy)  
 Cv: 556.99 Jmol<sup>-1</sup>K<sup>-1</sup>

**Table S14.** Comparison of Infrared Data for  $[\{\text{Co}(\text{CO})_2(\eta^5\text{-AsC}_4\text{H}_4)\}_2\text{Au}]^+$  (**5'**) and  $[\{\text{Co}(\text{CO})_2(\eta^5\text{-AsC}_4\text{Me}_4)\}_2\text{Au}]^+$  (**5**)

| Complex                                                                                               |                         | $\nu_{\text{CO}}$ [cm <sup>-1</sup> ] |      |      |
|-------------------------------------------------------------------------------------------------------|-------------------------|---------------------------------------|------|------|
| $[\{\text{Co}(\text{CO})_2(\eta^5\text{-AsC}_4\text{H}_4)\}_2\text{Au}]^+$ <b>5'</b>                  | Calculated <sup>a</sup> | 2086                                  | 2059 |      |
|                                                                                                       | Uncorrected             | 2223                                  | 2195 |      |
| $[\{\text{Co}(\text{CO})_2(\eta^5\text{-AsC}_4\text{Me}_4)\}_2\text{Au}]^+$ Me <sub>8</sub> <b>5'</b> | Calculated <sup>a</sup> | 2071                                  | 2041 |      |
|                                                                                                       | Uncorrected             | 2207                                  | 2176 |      |
| $[\{\text{Co}(\text{CO})_2(\eta^5\text{-AsC}_4\text{Me}_4)\}_2\text{Au}]^+$ <b>5</b>                  | Measured <sup>b</sup>   | 2062                                  | 2051 | 2009 |

<sup>a</sup> $\omega$ B97X-D/6-31G\*/LANL2Dz/gas phase, scaling factor 0.9382. <sup>b</sup>CH<sub>2</sub>Cl<sub>2</sub> solution, as  $[\text{Au}(\text{C}_6\text{F}_5)_2]^-$  salt, variance with calculated values may suggest a

**Table S15.** Comparison of Geometrical Data for  $[\{\text{Co}(\text{CO})_2(\eta^5\text{-AsC}_4\text{H}_4)\}_2\text{Au}]^+$  (**5'**) and  $[\{\text{Co}(\text{CO})_2(\eta^5\text{-AsC}_4\text{Me}_4)\}_2\text{Au}]^+$  (**5**)

| Complex   |                         | Co-Au [Å] | Co-As [Å] | Au-As [Å] | As-Au-Co [°] |
|-----------|-------------------------|-----------|-----------|-----------|--------------|
| <b>5'</b> | Calculated <sup>a</sup> | 2.713     | 2.519     | 2.594     | 56.62        |
| <b>5</b>  | Measured <sup>b</sup>   | 2.664     | 2.520     | 2.526     | 58.13        |

<sup>a</sup> $\omega$ B97X-D/6-31G\*/LANL2Dz/gas phase. <sup>b</sup>X-ray diffraction of  $[\text{Au}(\text{C}_6\text{F}_5)_2]^-$  salt, mean values for crystallographically unique parameters.

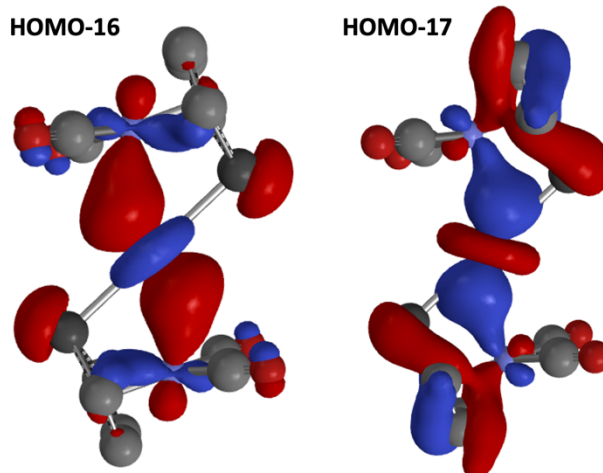

**Figure S12.** Orbitals associated with Co-Au  $\sigma$ -bonding for **5'**: (a) HOMO-16 (b) HOMO-17,

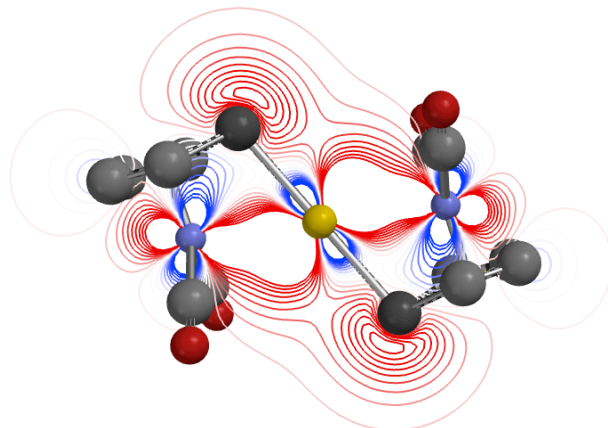

**Figure S13.** Topology of HOMO-16 (Slice) for **5'** ( $\omega$ B97X-D/6-31G\*/LANL2Dz) consistent with Co-Au  $\sigma$ -bonding.



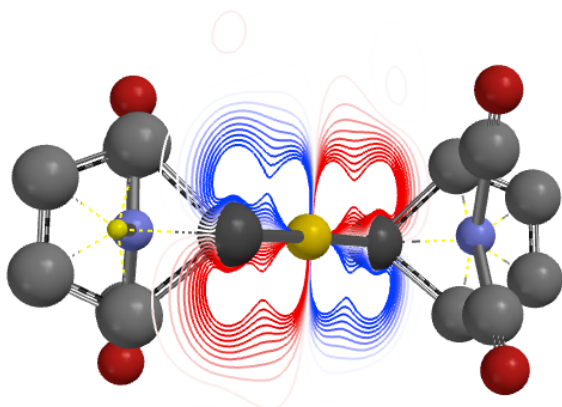

**Figure S14.** Topology of HOMO-19 (slice) for **5'** ( $\omega$ B97X-D/6-31G\*/LANL2D $\zeta$ ) consistent with As-Au  $\pi$ -bonding.

(a)

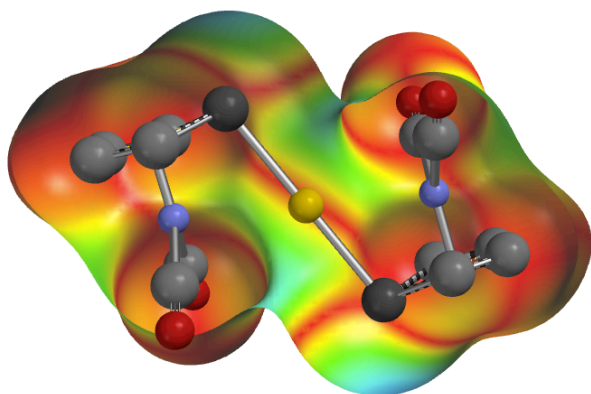

(b)

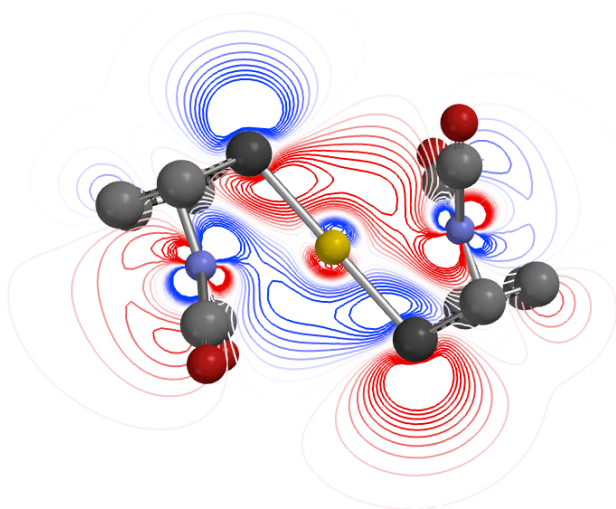

**Figure S15.** (a) LUMO Map (Isovalue: 0.002 e.a.u<sup>-3</sup>) indicating likely interaction sites (As, blue) for [Au(C<sub>6</sub>F<sub>5</sub>)<sub>2</sub>]<sup>-</sup> association and (b) LUMO topology (Slice) for **5'**.

**Table S16.** Calculated Löwden Bond orders

| Complex                                                                                  | Co-As | Co-M  | As-M  |
|------------------------------------------------------------------------------------------|-------|-------|-------|
| Co(CO) <sub>2</sub> (AsC <sub>4</sub> H <sub>4</sub> ) ( <b>2As'</b> )                   | 0.702 | –     | –     |
| Co(CO) <sub>2</sub> (AsC <sub>4</sub> Me <sub>4</sub> ) (Me <sub>4</sub> - <b>2As'</b> ) | 0.698 | –     | –     |
| ( <b>2As'</b> )Pt(CF <sub>3</sub> ) <sub>2</sub> (CO) ( <b>4'</b> )                      | 0.470 | 0.421 | 0.736 |
| (Me <sub>4</sub> - <b>2As'</b> )Pt(CF <sub>3</sub> ) <sub>2</sub> (CO)                   | 0.469 | 0.383 | 0.753 |
| ( <b>2As'</b> ) <sub>2</sub> Au <sup>+</sup> ( <b>5'</b> )                               | 0.448 | 0.559 | 0.780 |
| (Me <sub>4</sub> - <b>2As'</b> ) <sub>2</sub> Au <sup>+</sup>                            | 0.454 | 0.544 | 0.808 |

**Observations:**

- (i) In all cases, coordination of the arsenic to an extraneous metal (Au or Pt) results in a decrease in the Co–As bond order;
- (ii) Permethylation of the arsoly ligand results in a negligible of the Co–As bond order for the 'free' metalla-ligands;
- (iii) Permethylation of the arsoly ligand results in a modest (**5'**) or significant (Pt) decrease in the Co–M bond order, most likely due steric impacts.

### 3. Additional Tables and Figures

**Table S17.** Selected spectroscopic data for complexes prepared in this work, and some previously reported complexes for comparison.

| Entry                | Complex                                                                                               | $^{13}\text{C}$ $\delta_{\text{C-}\alpha}$ <sup>[a]</sup> | $^{13}\text{C}$ $\delta_{\text{C-}\beta}$ <sup>[a]</sup> | $^{13}\text{C}$ $\delta_{\text{CO}}$ <sup>[a]</sup> | $\nu_{\text{CO}}$ (sym) <sup>[b]</sup> | $\nu_{\text{CO}}$ (asym) <sup>[b]</sup> | $k$ <sup>[c]</sup> |
|----------------------|-------------------------------------------------------------------------------------------------------|-----------------------------------------------------------|----------------------------------------------------------|-----------------------------------------------------|----------------------------------------|-----------------------------------------|--------------------|
| <b>2a</b>            | Co(CO) <sub>2</sub> ( $\eta^5$ -AsC <sub>4</sub> Ph <sub>4</sub> )                                    | 137.2                                                     | 135.1                                                    | 203.8                                               | 2026                                   | 1978, 1970 <sup>[d]</sup>               | 16.13              |
| <b>2b</b>            | Co(CO) <sub>2</sub> ( $\eta^5$ -AsC <sub>4</sub> Ph <sub>2</sub> H <sub>2</sub> )                     | 138.1                                                     | 94.9                                                     | 203.0                                               | 2032                                   | 1985, 1976 <sup>[d]</sup>               | 16.23              |
| <b>2c</b>            | Co(CO) <sub>2</sub> ( $\eta^5$ -AsC <sub>4</sub> Me <sub>4</sub> )                                    | 118.9 <sup>[e]</sup>                                      | 113.1 <sup>[e]</sup>                                     | 205.1 <sup>[e]</sup>                                | 2019                                   | 1967                                    | 16.02              |
| <b>2d</b>            | Co(CO) <sub>2</sub> ( $\eta^5$ -AsC <sub>4</sub> Et <sub>4</sub> )                                    | 128.4 <sup>[e]</sup>                                      | 118.8 <sup>[e]</sup>                                     | 205.3 <sup>[e]</sup>                                | 2017                                   | 1965                                    | 15.99              |
| <b>2e</b>            | Co(CO) <sub>2</sub> ( $\eta^5$ -AsC <sub>4</sub> TMS <sub>2</sub> Me <sub>2</sub> )                   | 122.2 <sup>[e]</sup>                                      | 119.8 <sup>[e]</sup>                                     | 204.5 <sup>[e]</sup>                                | 2015                                   | 1962                                    | 15.95              |
| <b>2f</b>            | Co(CO){P(OMe) <sub>3</sub> }( $\eta^5$ -AsC <sub>4</sub> Me <sub>4</sub> )                            | 114.3                                                     | 109.8                                                    | 206.8                                               |                                        | 1947                                    | 15.39              |
| <b>2g</b>            | Co(CO){P(OMe) <sub>3</sub> }( $\eta^5$ -AsC <sub>4</sub> Et <sub>4</sub> )                            | 124.4                                                     | 115.3                                                    | 207.3                                               |                                        | 1945                                    | 15.36              |
| <b>2h</b>            | Co(CO){P(OMe) <sub>3</sub> }( $\eta^5$ -AsC <sub>4</sub> TMS <sub>2</sub> Me <sub>2</sub> )           | 118.7                                                     | 116.1                                                    | 205.5                                               |                                        | 1941                                    | 15.30              |
| Ref. <sup>[7]</sup>  | Co(CO) <sub>2</sub> ( $\eta^5$ -C <sub>5</sub> H <sub>5</sub> )                                       | 84.5 <sup>[e]</sup>                                       |                                                          | 205.6 <sup>[e]</sup>                                | 2033 <sup>[f]</sup>                    | 1972 <sup>[f]</sup>                     | 16.17              |
| Ref. <sup>[7]</sup>  | Co(CO) <sub>2</sub> ( $\eta^5$ -C <sub>5</sub> Me <sub>5</sub> )                                      | 96.7 <sup>[e]</sup>                                       |                                                          | 207.9 <sup>[e]</sup>                                | 2011                                   | 1949                                    | 15.81              |
| Ref. <sup>[8]</sup>  | Co(CO) <sub>2</sub> ( $\eta^5$ -C <sub>5</sub> Ph <sub>5</sub> )                                      |                                                           | No data reported                                         |                                                     | 2000                                   | 1945                                    | 15.69              |
| Ref. <sup>[8]</sup>  | Co(CO) <sub>2</sub> ( $\eta^5$ -C <sub>5</sub> (CH <sub>2</sub> Ph) <sub>5</sub> )                    |                                                           | No data reported                                         |                                                     | 2020                                   | 1960                                    | 15.97              |
| Ref. <sup>[9]</sup>  | Co(CO) <sub>2</sub> ( $\eta^5$ -PC <sub>4</sub> Ph <sub>2</sub> H <sub>2</sub> )                      |                                                           | No data reported                                         |                                                     | 2030                                   | 1980                                    | 16.21              |
| Ref. <sup>[10]</sup> | Co(CO) <sub>2</sub> ( $\eta^5$ -PC <sub>4</sub> <sup>t</sup> Bu <sub>2</sub> H <sub>2</sub> )         | 136.2                                                     | 91.9                                                     | 204.0                                               | 2023                                   | 1968                                    | 16.06              |
| Ref. <sup>[10]</sup> | Co(CO){P(OMe) <sub>3</sub> }( $\eta^5$ -PC <sub>4</sub> <sup>t</sup> Bu <sub>2</sub> H <sub>2</sub> ) | 134.7                                                     | 90.5                                                     | 208.0                                               |                                        | No data reported                        | -                  |

[a] C<sub>6</sub>D<sub>6</sub> solution unless otherwise stated, ppm downfield from SiMe<sub>4</sub>, 25 °C; the labels  $\alpha$  and  $\beta$  refer to ring-carbon positions with respect to the heteroatom (where applicable). [b] *n*-hexane solution unless otherwise stated, cm<sup>-1</sup>, 25 °C. [c] Cotton-Kraihanzel force constant in Ncm<sup>-1</sup>. [d] resolution of the doubly degenerate *E* vibrational mode is observed in *n*-hexane for these complexes *c.f.*,  $\nu_{\text{CO}}$  (CH<sub>2</sub>Cl<sub>2</sub>): **2a** 2022, 1963 cm<sup>-1</sup>; **2b** 2027, 1972 cm<sup>-1</sup>. [e] CDCl<sub>3</sub> solution, 25 °C. [f] Cyclohexane solution.

## 4. Synthetic Procedures and Spectroscopic and Crystallographic Data

### 4.1 Co(CO)<sub>2</sub>( $\eta^5$ -AsC<sub>4</sub>Ph<sub>4</sub>) (**2a**):

A 250 mL three-necked round bottom flask fitted with a water-cooled reflux condenser was charged 600 mg Co<sub>2</sub>(CO)<sub>8</sub> (1.75 mmol) and 800 mg PhAsC<sub>4</sub>Ph<sub>4</sub> (1.5 mmol) or 700 mg ClAsC<sub>4</sub>Ph<sub>4</sub> (1.5 mmol); 80 mL THF was admitted, and the mixture was brought to reflux under argon for 6 hours. After this time, volatiles were removed under reduced pressure and the residue was taken up in CH<sub>2</sub>Cl<sub>2</sub>, filtered through a short Celite® plug and adsorbed onto a small quantity of oven-dried, degassed silica gel by evaporation of the solvent. This was transferred to a water-jacketed column of

oven dried silica gel (30 x 2.5 cm) prepared by loading with *n*-pentane under nitrogen. Eluting with 4:1 *n*-pentane/benzene (**caution – carcinogen**) provided a bright orange band which was collected under nitrogen and taken to dryness. The product was re-crystallised from the minimum amount of hot *n*-hexane/benzene (*ca.* 9:1 v/v) cooled to -20 °C overnight providing 230 mg of the title compound as an orange-brown crystalline solid in 28 % isolated yield (based on ClAsC<sub>4</sub>Ph<sub>4</sub>; a 20 % yield was obtained with PhAsC<sub>4</sub>Ph<sub>4</sub>). The product is readily soluble in CH<sub>2</sub>Cl<sub>2</sub>, CHCl<sub>3</sub>, THF, acetonitrile, acetone, benzene and toluene, somewhat soluble in Et<sub>2</sub>O and less-so in *n*-hexane and *n*-pentane. NMR (C<sub>6</sub>D<sub>6</sub>, 25 °C): <sup>1</sup>H (400 MHz)  $\delta$  7.78–7.15 (m, 8H, C<sub>6</sub>H<sub>5</sub>), 6.85–6.77 (m, 12H, C<sub>6</sub>H<sub>5</sub>); <sup>13</sup>C{<sup>1</sup>H} (176 MHz)  $\delta$  203.8 (CO), 137.2 (C $\alpha$ ), 135.1 (C $\beta$ ), 133.1 (C<sub>6</sub>H<sub>5</sub>), 132.5 (C<sub>6</sub>H<sub>5</sub>), 130.5 (C<sub>6</sub>H<sub>5</sub>), 128.2 (C<sub>6</sub>H<sub>5</sub>), 127.9 (C<sub>6</sub>H<sub>5</sub>), 127.7 (C<sub>6</sub>H<sub>5</sub>), 127.6 (C<sub>6</sub>H<sub>5</sub>), 119.5 (C<sub>6</sub>H<sub>5</sub>); some aromatic carbon resonances are partially obscured by the C<sub>6</sub>D<sub>6</sub> solvent signal, however a <sup>13</sup>C{<sup>1</sup>H} spectrum in CDCl<sub>3</sub> finds  $\delta$  203.2 (CO), 136.9 (C $\alpha$ ), 134.6 (C $\beta$ ), 136.8 (C<sub>6</sub>H<sub>5</sub>), 134.6 (C<sub>6</sub>H<sub>5</sub>), 132.2 (C<sub>6</sub>H<sub>5</sub>), 130.2 (C<sub>6</sub>H<sub>5</sub>), 127.9 (C<sub>6</sub>H<sub>5</sub>), 127.6 (C<sub>6</sub>H<sub>5</sub>), 127.5 (C<sub>6</sub>H<sub>5</sub>), 127.4



(C<sub>6</sub>H<sub>5</sub>), 127.3 (C<sub>6</sub>H<sub>5</sub>), 119.1 (C<sub>6</sub>H<sub>5</sub>); IR (*n*-hexane)  $\nu_{\text{CO}}$  = 2026(vs), 1978(vs), 1970(vs) cm<sup>-1</sup>; IR (CH<sub>2</sub>Cl<sub>2</sub>)  $\nu_{\text{CO}}$  = 2022(vs), 1963(vs) cm<sup>-1</sup>; HR-MS (EI, MeCN) found *m/z* 546.0014 (calc. for C<sub>30</sub>H<sub>20</sub>O<sub>2</sub><sup>75</sup>As<sup>59</sup>Co [M]<sup>+</sup>: 546.0011). Analysis found: C, 65.91; H, 3.61%; calc. for C<sub>30</sub>H<sub>20</sub>O<sub>2</sub>AsCo: C, 65.95; H, 3.69%.

Single crystals of **2a** suitable for X-ray diffraction were grown from benzene/*n*-hexane at -20 °C. A suitable crystal was selected and mounted in oil on a Micromount™ mylar loop and fixed under a cold stream of nitrogen. Data were collected using an Agilent Technologies Supernova/EoS2-CCD diffractometer with graphite monochromated Cu-K $\alpha$  radiation ( $\lambda$  = 1.54184 Å) at 150.0(1) K. Data were processed using the CrysAlisPRO-CCD and –RED software packages<sup>11</sup> and a Gaussian absorption correction was applied ( $T_{\text{min}}/T_{\text{max}}$  = 0.219 / 1.000). The structure was solved within Olex2<sup>12</sup> with SHELXT<sup>13</sup> using Intrinsic Phasing and refined with the SHELXL<sup>14</sup> refinement package using Least-Squares against  $F^2$  in an anisotropic (for non-hydrogen atoms) approximation. Aromatic hydrogen atom positions were refined in isotropic approximation in a “riding” model with the  $U_{\text{iso}}(\text{H})$  parameters fixed to 1.2  $U_{\text{eq}}(\text{C})$ , where  $U_{\text{eq}}(\text{C})$  is the equivalent thermal parameter of the carbon atom to which the corresponding H atom is bonded. Principal crystallographic data and refinement parameters are as follows: C<sub>30</sub>H<sub>20</sub>AsCoO<sub>2</sub> ( $M_w$  = 546.31 gmol<sup>-1</sup>): orange plate 0.298 × 0.110 × 0.083 mm, triclinic, space group *P*-1 (no. 2),  $a$  = 9.0514(4) Å,  $b$  = 10.5907(5) Å,  $c$  = 12.8357(6) Å,  $\alpha$  = 76.116(4)°,  $\beta$  = 84.418(4)°,  $\gamma$  = 78.076(4)°,  $V$  = 1167.24(10) Å<sup>3</sup>,  $Z$  = 2,  $\mu(\text{Cu-K}\alpha)$  = 7.541 mm<sup>-1</sup>,  $\rho_{\text{calc}}$  = 1.554 Mgm<sup>-3</sup>, 11946 reflections measured ( $7.104^\circ \leq 2\theta \leq 147.544^\circ$ ), 4691 unique ( $R_{\text{int}}$  = 0.0239,  $R_{\text{sigma}}$  = 0.0282) which were used in all calculations, GOF = 1.037,  $D_{\text{min}}/D_{\text{max}}$  = -0.64 / 0.44 eÅ<sup>-3</sup>. The final  $R_1$  was 0.0336 ( $I > 2\sigma(I)$ ) and  $wR_2$  was 0.0887 (all data). CCDC number 2130783.

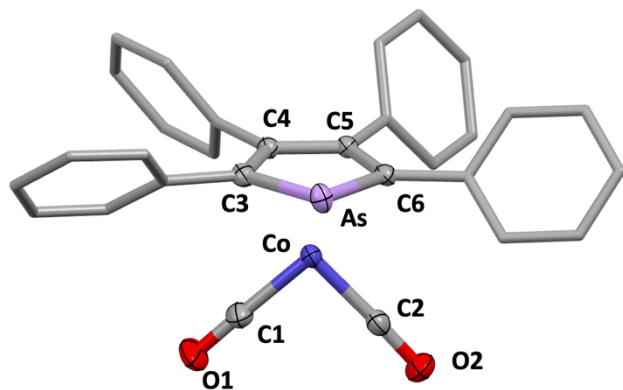

**Figure S16.** Molecular structure of **2a** (50% displacement ellipsoids, arsenolyl ring substituents simplified). Selected distances [Å] and angles [°]: As1-Co1 2.427(4), As1-C3 1.900(2), C3-C4 1.443(3), C4-C5 1.427(3), C5-C6 1.439(3), C6-As1 1.915(2), Co1-C1 1.746(3), Co1-C2 1.747(3), C3-As1-C6 84.52(8), As1-C3-C4 114.32(1), C3-C4-C5 113.65(2), C4-C5-C6 112.84(2), C5-C6-As1 114.38(1), C1-Co1-C2 90.82(1).

## 4.2 Co(CO)<sub>2</sub>( $\eta^5$ -AsC<sub>4</sub>Ph<sub>2</sub>H<sub>2</sub>) (**2b**):

Prepared as above. Quantities: 500 mg Co<sub>2</sub>(CO)<sub>8</sub> (1.5 mmol), 450 mg PhAsC<sub>4</sub>P<sub>2</sub>H<sub>2</sub> (1.25 mmol). Chromatographed on silica gel (30 × 2.5 cm) under nitrogen with 9:1 *n*-pentane/benzene providing a bright orange band. Re-crystallised from the minimum amount of hot *n*-hexane/benzene (ca. 9:1 *v/v*) cooled to -20 °C overnight, isolated yield of orange-brown crystalline solid: 105 mg (21 % based on arsenic). Solubility properties are similar to **2a** above. NMR (C<sub>6</sub>D<sub>6</sub>, 25 °C) <sup>1</sup>H (400 MHz)  $\delta$  7.27 (m, 4H, C<sub>6</sub>H<sub>5</sub>), 6.99 (m, 6H, C<sub>6</sub>H<sub>5</sub>) 5.93 (s, 2H,  $\beta$ -CH); <sup>13</sup>C{<sup>1</sup>H} (176 MHz)  $\delta$  203.2 (CO), 138.1 (C $\alpha$ ), 128.9 (C<sub>6</sub>H<sub>5</sub>), 128.5 (C<sub>6</sub>H<sub>5</sub>), 128.3 (C<sub>6</sub>H<sub>5</sub>), 127.3 (C<sub>6</sub>H<sub>5</sub>), 94.9 (C $\beta$ ); some aromatic carbon resonances are partially obscured by the C<sub>6</sub>D<sub>6</sub> solvent signal, however a <sup>13</sup>C{<sup>1</sup>H} spectrum in CDCl<sub>3</sub> finds  $\delta$  202.7 (CO), 137.9 (C $\alpha$ ), 128.9 (C<sub>6</sub>H<sub>5</sub>), 128.8 (C<sub>6</sub>H<sub>5</sub>), 128.3 (C<sub>6</sub>H<sub>5</sub>), 127.2 (C<sub>6</sub>H<sub>5</sub>), 94.7 (C $\beta$ ); IR (*n*-hexane)  $\nu_{\text{CO}}$  = 2032(vs), 1985(vs), 1976(vs) cm<sup>-1</sup>; IR (CH<sub>2</sub>Cl<sub>2</sub>)  $\nu_{\text{CO}}$  = 2027(vs), 1974(vs) cm<sup>-1</sup>; HR-MS (EI, MeCN) found *m/z* 393.9383 (calc. for C<sub>18</sub>H<sub>12</sub>O<sub>2</sub><sup>75</sup>As<sup>59</sup>Co [M]<sup>+</sup>: 393.9383). Analysis found: C, 54.86; H, 2.93%; calc. for C<sub>18</sub>H<sub>12</sub>O<sub>2</sub>AsCo: C, 54.85; H, 3.07%.

Single crystals of **2b** suitable for X-ray diffraction were grown from benzene/*n*-hexane at -20 °C. A suitable crystal was selected and mounted in oil on a Micromount™ mylar loop and fixed under a cold stream of nitrogen. Data were collected using an Agilent Technologies Supernova/EoS2-CCD diffractometer with graphite monochromated Cu-K $\alpha$  radiation ( $\lambda$  = 1.54184 Å) at 150.0(1) K. Data were processed using the CrysAlisPRO-CCD and –RED software packages<sup>11</sup> and Multi-scan absorption correction was applied ( $T_{\text{min}}/T_{\text{max}}$  = 0.56452 / 1.00000). The structure was solved within Olex2<sup>12</sup> with SHELXT<sup>13</sup> using Intrinsic Phasing and refined with the SHELXL<sup>14</sup> refinement package using Least-Squares against  $F^2$  in an anisotropic (for non-hydrogen atoms) approximation. Aromatic hydrogen atom positions were refined in isotropic approximation in a “riding” model with the  $U_{\text{iso}}(\text{H})$  parameters fixed to 1.2  $U_{\text{eq}}(\text{C})$ , where  $U_{\text{eq}}(\text{C})$  is the equivalent thermal parameter of the carbon atom to which the corresponding H atom is bonded. Atom C5 (see Fig. S2) exhibited a belligerent thermal ellipsoid which could be indicative of some rotational disorder of the  $\eta^5$ -arsolyl group however this could not be modelled satisfactory – this effect was present across three separate crystal specimens and did not appear to affect data quality. Principal crystallographic data and refinement parameters are as follows: C<sub>18</sub>H<sub>12</sub>AsCoO<sub>2</sub> ( $M_w$  = 394.13 gmol<sup>-1</sup>): orange needle, 0.109 × 0.061 × 0.029 mm, orthorhombic, space group *Pna*2<sub>1</sub> (no. 33),  $a$  = 11.23470(10) Å,  $b$  = 17.27710(10) Å,  $c$  = 7.83560(10) Å,  $V$  = 1520.91(3) Å<sup>3</sup>,  $Z$  = 4,  $\mu(\text{Cu-K}\alpha)$  = 11.289 mm<sup>-1</sup>,  $\rho_{\text{calc}}$  = 1.721 Mgm<sup>-3</sup>, 27398 reflections measured ( $9.39^\circ \leq 2\theta \leq 147.908^\circ$ ), 3057 unique ( $R_{\text{int}}$  = 0.0453,  $R_{\text{sigma}}$  = 0.0224) which were used in all calculations, GOF = 1.085,  $D_{\text{min}}/D_{\text{max}}$  = -0.65/0.97 eÅ<sup>-3</sup>. The final  $R_1$  was 0.0386 ( $I > 2\sigma(I)$ ) and  $wR_2$  was 0.0936 (all data) for 193 parameters and one restraint. CCDC number 2130784.

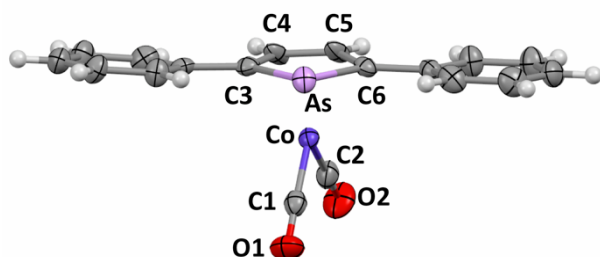

**Figure S17.** Molecular structures of **2b** (50% displacement ellipsoids, arsenolyl ring substituents simplified). Selected distances [Å] and angles [°]: As1-Co1 2.393(1), As1-C3 1.933(7), C3-C4 1.389(9), C4-C5 1.365(1), C5-C6 1.357(9), C6-As1 1.915(6), Co1-C1 1.735(8), Co1-C2 1.734(7), C3-As1-C6 87.37(3), As1-C3-C4 111.12(5), C3-C4-C5 110.23(6), C4-C5-C6 126.02(6), C5-C6-As1 104.64(5), C1-Co1-C2 94.45(3).

### 4.3 Co(CO)<sub>2</sub>(η<sup>5</sup>-AsC<sub>4</sub>Me<sub>4</sub>) (**2c**):

Prepared as above with the modification of heating to reflux in 50 mL *n*-hexane for 6 hours. Typical quantities: 720 mg Co<sub>2</sub>(CO)<sub>8</sub> (2.1 mmol) and 430 mg freshly prepared ClAsC<sub>4</sub>Me<sub>4</sub> (2 mmol). Chromatography on neutral alumina (25 x 2.5 cm) under nitrogen with *n*-pentane provided an orange-red band, which was collected under nitrogen and taken to dryness providing between ca. 80–190 mg of the product as a dark orange-red liquid in an average isolated yield of ~19 % (based on ClAsC<sub>4</sub>Me<sub>4</sub> across 6 separate preparations; a ~15 % average isolated yield was obtained with PhAsC<sub>4</sub>Me<sub>4</sub> across 3 separate preparations). The product is readily soluble in most common organic solvents, though was difficult to completely free from solvents with which it had previously been dissolved despite being held under reduced pressure for extended periods of time, as evidenced by NMR spectroscopy. The product is readily soluble in most common organic solvents. NMR (CDCl<sub>3</sub>, 25 °C) <sup>1</sup>H (400 MHz) δ 2.12 (s, 6H, α-CH<sub>3</sub>), 1.85 (s, 6H, β-CH<sub>3</sub>); <sup>13</sup>C{<sup>1</sup>H} (176 MHz) δ 205.8 (CO), 118.9 (C<sub>α</sub>), 113.1 (C<sub>β</sub>), 17.1 (α-CH<sub>3</sub>), 14.5 (β-CH<sub>3</sub>); IR (*n*-hexane) ν<sub>CO</sub> = 2019(vs), 1967(vs) cm<sup>-1</sup>; HR-MS (EI, MeCN) found *m/z* 297.9389 (calc. for C<sub>10</sub>H<sub>12</sub>O<sub>4</sub><sup>75</sup>As<sup>59</sup>Co [M]<sup>+</sup>: 297.9385); satisfactory elemental microanalysis could not be obtained due to entrained solvent.

### 4.4 Co(CO)<sub>2</sub>(η<sup>5</sup>-AsC<sub>4</sub>Et<sub>4</sub>) (**2d**):

Prepared as above. Quantities: 480 mg Co<sub>2</sub>(CO)<sub>8</sub> (1.4 mmol) and 350 mg ClAsC<sub>4</sub>Et<sub>4</sub>, (1.25 mmol). Chromatography on neutral alumina (25 x 2.5 cm) under nitrogen with *n*-pentane provided an orange-red band, which was collected under nitrogen and taken to dryness under reduced pressure giving 105–130 mg of the product as a dark orange-red liquid in an average isolated yield of 25 % (based on arsenic from 2 separate preparations; a 16 % yield was obtained with PhAsC<sub>4</sub>Et<sub>4</sub> from one preparation). The product is readily soluble in most common organic solvents. NMR (CDCl<sub>3</sub>, 25 °C) <sup>1</sup>H (400 MHz; NB: diastereotopic methylene protons on each Et groups) δ 2.54 (dt, *J* = 15, 7, 7 Hz, 2H, α-CH<sub>2</sub>CH<sub>3</sub>), 2.41 (dt, *J* = 15, 7, 7 Hz, 2H, α-CH<sub>2</sub>CH<sub>3</sub>), 2.26 (dt, *J* = 15, 7, 7 Hz, 2H, β-CH<sub>2</sub>CH<sub>3</sub>), 2.07 (dt, *J* = 15, 7, 7 Hz, 2H, β-CH<sub>2</sub>CH<sub>3</sub>), 1.19 (td, *J* = 7, 7, 3 Hz, 12H, α- & β-CH<sub>2</sub>CH<sub>3</sub>); <sup>13</sup>C{<sup>1</sup>H} (176 MHz) δ 205.3 (CO),

128.4 (C<sub>α</sub>), 118.8 (C<sub>β</sub>), 24.4 (α-CH<sub>2</sub>CH<sub>3</sub>), 21.2 (β-CH<sub>2</sub>CH<sub>3</sub>), 16.9 (α-CH<sub>2</sub>CH<sub>3</sub>), 16.6 (β-CH<sub>2</sub>CH<sub>3</sub>); these data are consistent with methyl groups *syn* or *anti* to the cobalt not interconverting on the <sup>13</sup>C NMR timescale. IR (*n*-hexane) ν<sub>CO</sub> = 2017(vs), 1965(vs) cm<sup>-1</sup>; HR-MS (EI, MeCN) found *m/z* 354.0011 (calc. for C<sub>14</sub>H<sub>20</sub>O<sub>2</sub><sup>59</sup>Co<sup>75</sup>As<sub>1</sub> [M]<sup>+</sup>: 354.0010); Satisfactory elemental microanalytical data were not be obtained for this oil.

### 4.5 Co(CO)<sub>2</sub>(η<sup>5</sup>-AsC<sub>4</sub>(SiMe<sub>3</sub>)<sub>2</sub>Me<sub>2</sub>) (**2e**):

Prepared as above. Quantities: 450 mg Co<sub>2</sub>(CO)<sub>8</sub> (1.3 mmol) and 400 mg ClAsC<sub>4</sub>TMS<sub>2</sub>Me<sub>2</sub> (1.2 mmol) Chromatography on alumina (25 x 2.5 cm) with *n*-pentane provides an orange band which is collected under nitrogen and taken to dryness, giving 130 mg of the product as a dark orange liquid in 26 % isolated yield (based on arsenic). The product is readily soluble in most common organic solvents. NMR (CDCl<sub>3</sub>, 25 °C) <sup>1</sup>H (400 MHz) δ 2.21 (s, 6H, β-CH<sub>3</sub>), 0.23 (s, 18H, α-Si(CH<sub>3</sub>)<sub>3</sub>); <sup>13</sup>C{<sup>1</sup>H} (176 MHz) δ 204.5 (CO), 122.2 (C<sub>α</sub>), 119.8 (C<sub>β</sub>), 18.4 (β-CH<sub>3</sub>), 1.3 (α-Si(CH<sub>3</sub>)<sub>3</sub>); IR (*n*-hexane) ν<sub>CO</sub> = 2015(vs), 1963(vs) cm<sup>-1</sup>; HR-MS (EI, MeCN) found *m/z* 413.9851 (calc. for C<sub>14</sub>H<sub>24</sub>O<sub>2</sub><sup>28</sup>Si<sub>2</sub><sup>59</sup>Co<sup>75</sup>As [M]<sup>+</sup>: 413.9863). Satisfactory elemental microanalytical data were not be obtained for this oil.

### 4.6-8 Co(CO){P(OMe)<sub>3</sub>}(η<sup>5</sup>-AsC<sub>4</sub>R<sub>4</sub>) (**2f–h**)

To a solution of **2c** (120 mg, 0.30 mmol), **2d** (110 mg, 0.31 mmol) or **2e** (110 mg, 0.27 mmol) in 10 mL toluene was added ~0.1 mL neat P(OMe)<sub>3</sub> (excess) and the mixture warmed to 100 °C – the dark orange-red colour discharged to a bright orange over the course of ca. 30 minutes, and heating was continued for a total of 2 hours. After this time, the mixture was transferred *via* syringe to a column of oven-dried neutral alumina (20 x 2.5 cm) made up in *n*-pentane under nitrogen. Eluting with *n*-pentane, followed by 4:1 *n*-pentane/Et<sub>2</sub>O provided a bright orange band which was collected under nitrogen and taken to dryness under reduced pressure. No unreacted starting materials were observed during chromatography although a minor green-brown band remained immobile atop the alumina. The complexes **2f** and **2h** were obtained as bright orange solids after re-crystallisation from SiMe<sub>4</sub> whereas **2g** is an orange liquid which eventually solidified upon prolonged storage at -30 °C. Isolated yields: **2f** 100 mg (85 %), **2g** 110 mg (80 %), and **2h** 115 mg (83 %). All were found to decompose upon contact with air, either neat or in solution, and appear to react with CH<sub>2</sub>Cl<sub>2</sub> and CDCl<sub>3</sub> to precipitate unknown paramagnetic materials. All are readily soluble in common organic solvents.

### 4.6 Co(CO){P(OMe)<sub>3</sub>}(η<sup>5</sup>-AsC<sub>4</sub>Me<sub>4</sub>) (**2f**)

**2f**: NMR (C<sub>6</sub>D<sub>6</sub>, 25 °C): <sup>1</sup>H (400 MHz) δ 3.36 (d, <sup>3</sup>J<sub>PH</sub> = 12 Hz, 9H, POCH<sub>3</sub>), 1.94 (s, 6H, α-CH<sub>3</sub>), 1.83 (s, 6H, β-CH<sub>3</sub>); <sup>13</sup>C{<sup>1</sup>H} (176 MHz) δ 206.8 (CO), 114.3 (C<sub>α</sub>), 109.8 (C<sub>β</sub>), 51.0 (POCH<sub>3</sub>), 16.9 (α-CH<sub>3</sub>), 14.4 (β-CH<sub>3</sub>); <sup>31</sup>P{<sup>1</sup>H} (161 MHz) δ 3.3 (s, broad); IR (*n*-hexane) ν<sub>CO</sub> = 1947 cm<sup>-1</sup>; HR-MS (EI, MeCN) found *m/z* 393.9725

(calc. for  $C_{12}H_{21}O_4^{75}As^{59}CoP$  [ $M$ ]<sup>+</sup>: 393.9725). Analysis found: C, 36.60; H, 5.16%; calc. for  $C_{12}H_{21}O_4AsCoP$ : 36.57 C, 5.37 H%.

Single crystals of **2f** suitable for X-ray diffraction were grown by evaporation of  $SiMe_4$  solution at  $-30$  °C. A suitable crystal was selected and mounted in oil on a Micromount™ mylar loop and fixed under a cold stream of nitrogen. Data were collected using an Agilent Technologies Supernova/EosS2-CCD diffractometer with graphite monochromated  $Cu-K\alpha$  radiation ( $\lambda = 1.54184$  Å) at 150.0(1) K. Data were processed using the CrysAlisPRO-CCD and –RED software packages<sup>11</sup> and a Gaussian absorption correction was applied ( $T_{min} / T_{max} = 0.29678 / 0.37651$ ). The structure was solved within Olex2<sup>12</sup> with SHELXT<sup>13</sup> using Intrinsic Phasing and refined with SHELXL<sup>14</sup> refinement package using Least-Squares against  $F^2$  in an anisotropic (for non-hydrogen atoms) approximation. Aliphatic hydrogen atom positions were refined in isotropic approximation in a “riding” model with the  $U_{iso}(H)$  parameters fixed to 1.5  $U_{eq}(C)$ , where  $U_{eq}(C)$  is the equivalent thermal parameter of the carbon atom to which the corresponding H atom is bonded. Two independent molecules of **2f** were found in the unit cell. Principal crystallographic data and refinement parameters are as follows:  $C_{12}H_{21}AsCoO_4P$  ( $M_w = 394.11$   $g\ mol^{-1}$ ): orange plate,  $0.235 \times 0.176 \times 0.075$  mm, monoclinic, space group  $P2_1/n$  (no. 14),  $a = 8.19800(10)$  Å,  $b = 14.8986(2)$  Å,  $c = 26.2475(3)$  Å,  $\beta = 97.0710(10)^\circ$ ,  $V = 3181.45(7)$  Å<sup>3</sup>,  $Z = 8$ ,  $\mu(Cu-K\alpha) = 11.788$   $mm^{-1}$ ,  $\rho_{calc} = 1.646$   $Mgm^{-3}$ , 42721 reflections measured ( $6.786^\circ \leq 2\theta \leq 148.738^\circ$ ), 6425 unique ( $R_{int} = 0.0382$ ,  $R_{sigma} = 0.0223$ ) which were used in all calculations,  $GOF = 1.065$ ,  $D_{min} / D_{max} = -0.89 / 1.46$   $e\text{Å}^{-3}$ . The final  $R_1$  was 0.0360 ( $I > 2\sigma(I)$ ) and  $wR_2$  was 0.0875 (all data). CCDC number 2130785.

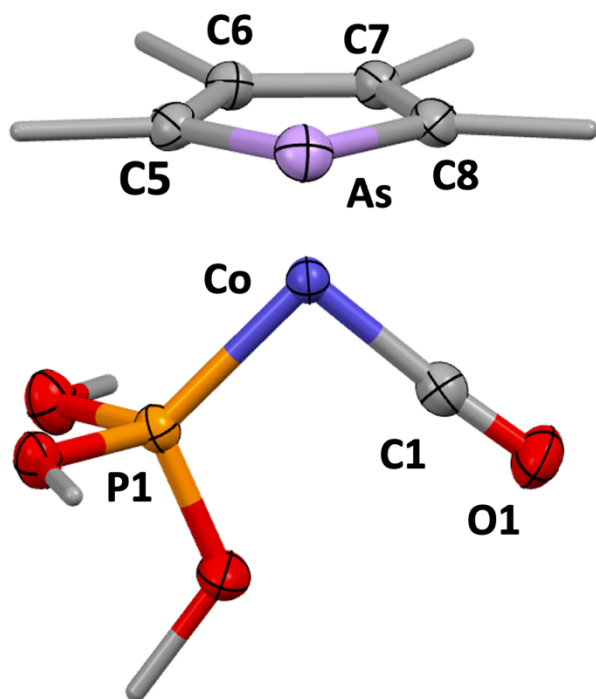

**Figure S18** Molecular structure of **2f** (50% displacement ellipsoids, arsenolyl ring and phosphite substituents simplified). Selected distances [Å] and angles [°]: As1-Co1 2.408(5), As1-C5 1.910(3), C5-C6 1.430(4), C6-C7 1.423(4), C7-C8 1.427(5), C8-As1 1.903(3), Co1-C1 1.719(3), Co1-P1 2.097(9), C5-As1-C8 84.12(1), As1-C5-C6 114.25(2), C5-C6-C7 113.30(3), C6-C7-C8 113.47(3), C7-C8-As1 114.56(2), C1-Co1-P1 93.49(1).

#### 4.7 $Co(CO)\{P(OMe)_3\}(\eta^5-AsC_4Et_4)$ (**2g**)

**2g**: NMR ( $C_6D_6$ , 25 °C):  $^1H$  (400 MHz)  $\delta$  3.40 (d,  $^3J_{PH} = 12$  Hz, 9H,  $POCH_3$ ), 2.45 (m, 4H,  $\alpha-CH_2CH_3$ ), 2.19 (m, 4H,  $\beta-CH_2CH_3$ ), 1.23 (t,  $^3J_{HH} = 7$  Hz, 6H,  $\alpha-CH_3$ ), 1.13 (t,  $^3J_{HH} = 7$  Hz, 6H,  $\beta-CH_3$ );  $^{13}C\{^1H\}$  (176 MHz)  $\delta$  207.4 (CO), 124.4 ( $C_\alpha$ ), 115.3 ( $C_\beta$ ), 51.3 ( $POCH_3$ ), 24.7 ( $\alpha-CH_2CH_3$ ), 22.0 ( $\beta-CH_2CH_3$ ), 17.8 ( $\alpha-CH_2CH_3$ ), 16.6 ( $\beta-CH_2CH_3$ );  $^{31}P\{^1H\}$  (161 MHz)  $\delta$  3.4 (s, broad); IR (*n*-hexane)  $\nu_{CO} = 1945$   $cm^{-1}$ ; HR-MS (EI, MeCN) found  $m/z$  450.0351 (calc. for  $C_{16}H_{29}O_4^{75}AsCoP$  [ $M$ ]<sup>+</sup>: 450.0352). Analysis found: C, 42.73; H, 6.31%; calc. for  $C_{16}H_{29}O_4AsCoP$ : C, 42.68; H, 6.49%. Single crystals suitable for X-ray diffraction were not obtained.

#### 4.8 $Co(CO)\{P(OMe)_3\}(\eta^5-AsC_4(SiMe_3)_2Me_2)$ (**2h**)

**2h**: NMR ( $C_6D_6$ , 25 °C):  $^1H$  (400 MHz)  $\delta$  3.40 (d,  $^3J_{PH} = 12$  Hz, 9H,  $POCH_3$ ), 2.15 (s, 6H,  $\beta-CH_3$ ), 0.32 (s, 18H,  $\alpha-Si(CH_3)_3$ );  $^{13}C\{^1H\}$  (176 MHz)  $\delta$  205.6 (CO), 118.7 ( $C_\alpha$ ), 116.0 ( $C_\beta$ ), 51.5 ( $POCH_3$ ), 18.7 ( $\beta-CH_3$ ), 1.6 ( $Si(CH_3)_3$ );  $^{31}P\{^1H\}$  (161 MHz)  $\delta$  3.8 (s, broad); IR (*n*-hexane)  $\nu_{CO} = 1941$   $cm^{-1}$ ; HR-MS (EI, MeCN) found  $m/z$  510.0199 (calc. for  $C_{16}H_{33}O_4^{75}AsCoP_1^{29}Si_2$  [ $M$ ]<sup>+</sup>: 510.0203). Analysis found: C, 37.55; H, 6.32%; calc. for  $C_{16}H_{33}O_4AsCoPSi_2$ : C, 37.65; H, 6.52%.

Single crystals of **2h** suitable for X-ray diffraction were grown by evaporation of  $SiMe_4$  solution at  $-30$  °C. A suitable crystal was selected and mounted in oil on a Micromount™ mylar loop and fixed under a cold stream of nitrogen. Data were collected using an Agilent Technologies Supernova/EosS2-CCD diffractometer with graphite monochromated  $Cu-K\alpha$  radiation ( $\lambda = 1.54184$  Å) at 150.0(1) K. Data were processed using the CrysAlisPRO-CCD and –RED software packages<sup>11</sup> and a Gaussian absorption correction was applied ( $T_{min} / T_{max} = 0.178 / 0.672$ ). The structure was solved within Olex2<sup>12</sup> with SHELXT<sup>13</sup> using Intrinsic Phasing and refined with the SHELXL<sup>14</sup> refinement package using Least-Squares against  $F^2$  in an anisotropic (for non-hydrogen atoms) approximation. Aliphatic hydrogen atom positions were refined in isotropic approximation in a “riding” model with the  $U_{iso}(H)$  parameters fixed to 1.5  $U_{eq}(C)$ , where  $U_{eq}(C)$  is the equivalent thermal parameter of the carbon atom to which the corresponding H atom is bonded. Principal crystallographic data and refinement parameters are as follows:  $C_{16}H_{33}AsCoO_4PSi_2$  ( $M_w = 510.42$   $g\ mol^{-1}$ ): orange needle,  $0.554 \times 0.091 \times 0.042$  mm, monoclinic, space group  $Cc$  (no. 9),  $a = 7.93850(10)$  Å,  $b = 19.9045(2)$  Å,  $c = 15.36370(10)$  Å,  $\beta = 90.3000(10)^\circ$ ,  $V = 2427.61(4)$  Å<sup>3</sup>,  $Z = 4$ ,  $\mu(Cu-K\alpha) = 8.764$   $mm^{-1}$ ,  $\rho_{calc} = 1.397$   $Mgm^{-3}$ , 23360 reflections measured ( $8.886^\circ \leq 2\theta \leq 147.518^\circ$ ), 4232 unique ( $R_{int} = 0.0252$ ,  $R_{sigma} = 0.0181$ ) which were used in all calculations,  $GOF = 1.030$ ,  $D_{min} / D_{max} = -0.32 / 0.31$   $e\text{Å}^{-3}$ . The final  $R_1$  was 0.0219 ( $I > 2\sigma(I)$ ) and  $wR_2$  was 0.0564 (all data). CCDC number 2130786.

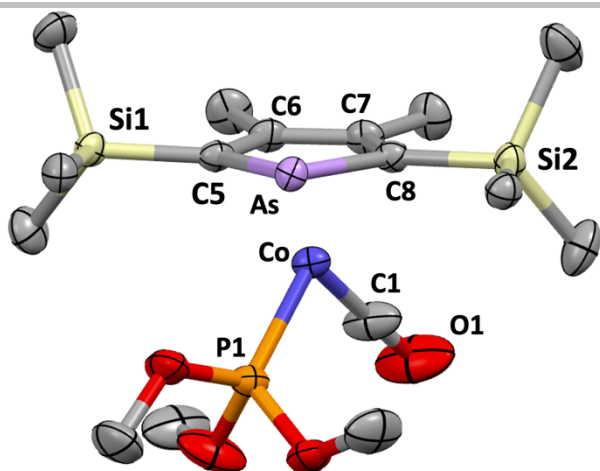

**Figure S19.** Molecular structure **2h** (50% displacement ellipsoids, arsolyl ring and phosphite substituents simplified). Selected distances [Å] and angles [°]: As1-Co1 2.3957(6), As1-C5 1.942(3), C5-C6 1.408(4), C6-C7 1.451(4), C7-C8 1.424(4), C8-As1 1.893(3), Co1-C1 1.712(4), Co1-P1 2.094(1), C5-As1-C8 87.48(1), As1-C5-C6 111.19(2), C5-C6-C7 114.09(3), C6-C7-C8 116.06(3), C7-C8-As1 111.06(2), C1-Co1-P1 91.14(2).

#### 4.9 [Co(CO)<sub>2</sub>(σ:η<sup>5</sup>-AsC<sub>4</sub>Me<sub>4</sub>)-HgCl(μ-Cl)]<sub>2</sub> (**3**)

To a stirred solution of **2c** (150 mg, 0.50 mmol) in 3 mL acetone was added a solution of HgCl<sub>2</sub> (125 mg, 0.46 mmol) in 3 mL of the same solvent. After a brief while a bright yellow precipitate began to form, and the mixture was stirred for a further 60 minutes. After this time, the almost colourless supernatant was decanted, and the solids washed further with acetone (3 x 3 mL portions) and Et<sub>2</sub>O (3 x 3 mL portions) and dried under vacuum. The isolated yield was 230 mg (91 % based on Hg). The product may be handled in air for some time as a solid however gains a brown cast overnight. The product was poorly soluble in virtually all available solvents and only partially dissolved in acetonitrile with prolonged trituration. Satisfactory NMR spectra could, regrettably, not be obtained due to extensive precipitation before or during acquisition. As indicated by IR, the bulk sample obtained from this preparation is exclusively the *anti*-isomer. IR (MeCN) ν<sub>CO</sub> = 2072(vs), 2036(vs) cm<sup>-1</sup>; HR-MS (ESI, MeCN) found *m/z* 1104.7222 (calc. for C<sub>20</sub>H<sub>24</sub>O<sub>4</sub><sup>75</sup>As<sub>2</sub><sup>35</sup>Cl<sub>3</sub>Co<sub>2</sub><sup>202</sup>Hg<sub>2</sub> [M-Cl]<sup>+</sup>: 1104.7216). Analysis found: C, 21.11; H, 1.98%; calc. for C<sub>20</sub>H<sub>24</sub>O<sub>4</sub>As<sub>2</sub>Cl<sub>4</sub>Co<sub>2</sub>Hg<sub>2</sub>: C, 21.09; H, 2.12%.

Single crystals of *anti*-**3** and *syn*-**3** suitable for X-ray diffraction were grown by layering an acetone solution of **2c** with an acetone solution of HgCl<sub>2</sub> at -30 °C. Suitable crystals were selected and mounted in oil on Micromount™ mylar loops and fixed under a cold stream of nitrogen. Data were collected using an Agilent Technologies Supernova/EosS2-CCD diffractometer with graphite monochromated Cu-K<sub>α</sub> radiation (λ = 1.54184 Å) at 150.00(10) K. Data were processed using the CrysAlisPRO-CCD and -RED software packages<sup>11</sup> and spherical absorption corrections were applied (*anti*-**3**: *T*<sub>min</sub> / *T*<sub>max</sub> = 0.07271 / 0.17197. *syn*-**3**: *T*<sub>min</sub> / *T*<sub>max</sub> = 0.02226 / 0.10591). The structures were solved within Olex2<sup>12</sup> with SHELXT<sup>13</sup> using Intrinsic Phasing and refined with the SHELXL<sup>14</sup> refinement package using Least-Squares against *F*<sup>2</sup> in an anisotropic (for non-hydrogen atoms) approximation. Aliphatic hydrogen atom positions were refined in isotropic approximation in

a “riding” model with the *U*<sub>iso</sub>(H) parameters fixed to 1.5 *U*<sub>eq</sub>(C), where *U*<sub>eq</sub>(C) is the equivalent thermal parameter of the carbon atom to which the corresponding H atom is bonded. Principal crystallographic data and refinement parameters are as follows: *anti*-C<sub>20</sub>H<sub>24</sub>As<sub>2</sub>Cl<sub>4</sub>Co<sub>2</sub>Hg<sub>2</sub>O<sub>4</sub> (*M*<sub>w</sub> = 1139.07 gmol<sup>-1</sup>): yellow needle, 0.51 × 0.074 × 0.046 mm, monoclinic, space group *P*2<sub>1</sub>/*n* (no. 14), *a* = 8.83040(10) Å, *b* = 14.2969(2) Å, *c* = 11.8460(2) Å, β = 94.2220(10)°, *V* = 1491.47(4) Å<sup>3</sup>, *Z* = 2, μ(Cu-K<sub>α</sub>) = 32.581 mm<sup>-1</sup>, ρ<sub>calc</sub> = 2.536 Mgm<sup>-3</sup>, 8025 reflections measured (9.712° ≤ 2θ ≤ 147.534°), 3000 unique (*R*<sub>int</sub> = 0.0307, *R*<sub>sigma</sub> = 0.0342) which were used in all calculations, GOF = 1.074, *D*<sub>min</sub> / *D*<sub>max</sub> = -1.34 / 1.32 e/Å<sup>3</sup>. The final *R*<sub>1</sub> was 0.0415 (*I* > 2σ(*I*)) and *wR*<sub>2</sub> was 0.1021 (all data). CCDC number 2130789; *syn*-C<sub>20</sub>H<sub>24</sub>As<sub>2</sub>Cl<sub>4</sub>Co<sub>2</sub>Hg<sub>2</sub>O<sub>4</sub> (*M*<sub>w</sub> = 1139.07 gmol<sup>-1</sup>): orange prism, 0.426 × 0.151 × 0.118 mm, monoclinic, space group *C*2/*c* (no. 15), *a* = 14.1928(3) Å, *b* = 14.4745(3) Å, *c* = 14.7169(3) Å, β = 99.340(2)°, *V* = 2983.26(11) Å<sup>3</sup>, *Z* = 4, μ(Cu-K<sub>α</sub>) = 32.578 mm<sup>-1</sup>, ρ<sub>calc</sub> = 2.536 Mgm<sup>-3</sup>, 8233 reflections measured (8.786° ≤ 2θ ≤ 147.722°), 3020 unique (*R*<sub>int</sub> = 0.0468, *R*<sub>sigma</sub> = 0.0454) which were used in all calculations, GOF = 1.109, *D*<sub>min</sub> / *D*<sub>max</sub> = -2.61 / 4.25 eÅ<sup>-3</sup>. The final *R*<sub>1</sub> was 0.0660 (*I* > 2σ(*I*)) and *wR*<sub>2</sub> was 0.1782 (all data). CCDC number 2130788.

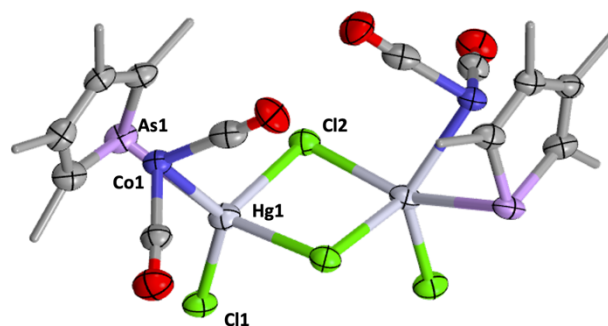

**Figure S20.** The molecular structure of *syn*-**3** (Methyl groups simplified, 50% displacement ellipsoids). Selected distances [Å] and angles [°]: (a) *syn*-**3** As1-Hg1 2.7268(9), Co1-Hg1 2.620(1), Hg1-Cl1 2.491(2), Hg1-Cl2 2.598(2), Hg1-Cl2' 2.708(2), As1-Hg1-Co1 55.86(3), Hg1-Cl2-Hg1' 91.87(6), Cl2-Hg1-Cl2' 87.62(6), Cl1-Hg1-Cl2 100.71(6).

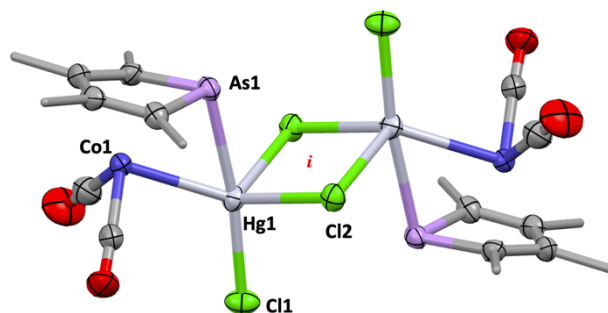

**Figure S21.** The molecular structures of *anti*-**3** (Methyl groups simplified, 50% displacement ellipsoids). Selected distances [Å] and angles [°]: As1-Hg1 2.6334(6), Co1-Hg1 2.6702(9), Hg1-Cl1 2.390(1), Hg1-Cl2 2.778(1), Hg1-Cl2' 2.777(1) As1-Hg1-Co1 56.27(2), Hg1-Cl2-Hg1' 84.37(4), Cl2-Hg1-Cl2' 95.63(4), Cl1-Hg1-Cl2, 100.59(5). *i* = crystallographic inversion centre.

#### 4.10 *cis*-[Co(CO)<sub>2</sub>(μ:σ,η<sup>5</sup>-AsC<sub>4</sub>Me<sub>4</sub>)]Pt(CO)(C<sub>6</sub>F<sub>5</sub>)<sub>2</sub> (**4**)



To a solution of **2c** (110 mg, 0.37 mmol) in 5 mL CH<sub>2</sub>Cl<sub>2</sub> was added solid Pt(C<sub>6</sub>F<sub>5</sub>)<sub>2</sub>(η<sup>4</sup>-C<sub>6</sub>H<sub>10</sub>) (145 mg, 0.27 mmol). Over the course of about 60 minutes the orange colour discharged to a dark yellow-brown; the reaction was monitored by IR and was deemed complete after a further 60 minutes when **2c** was no longer observed. Volatiles were removed under reduced pressure and the residue extracted with the minimum amount of Et<sub>2</sub>O and transferred *via* syringe to a water-jacketed column of oven-dried Florisil® (15 x 1 cm) made up in *n*-pentane under nitrogen. Eluting with *n*-pentane, followed by 3:1 *n*-pentane/Et<sub>2</sub>O provided an orange band which was collected under nitrogen and taken to dryness under reduced pressure. The orange residue was crystallised from the minimum amount of benzene overnight giving 95 mg of the product as a dark orange solid in 45% yield (based on Pt). The product is readily soluble in CH<sub>2</sub>Cl<sub>2</sub>, CHCl<sub>3</sub>, acetone, acetonitrile, Et<sub>2</sub>O and THF, somewhat soluble in benzene and toluene and less-so in *n*-hexane or *n*-pentane. NMR (CD<sub>2</sub>Cl<sub>2</sub>, 25 °C): <sup>1</sup>H (400 MHz) δ 2.30 (s, 6H: α-CH<sub>3</sub>), 1.48 (s, 6H: β-CH<sub>3</sub>); <sup>13</sup>C{<sup>1</sup>H} (176 MHz) δ 198.0 (Co-CO), 177.17 (Pt-CO), 146.7 (m, C<sub>6</sub>F<sub>5</sub>), 139.6 (m, C<sub>6</sub>F<sub>5</sub>), 138.7 (m, C<sub>6</sub>F<sub>5</sub>), 138.2 (m, C<sub>6</sub>F<sub>5</sub>), 137.0 (m, C<sub>6</sub>F<sub>5</sub>), 126.2 (C<sub>α</sub>), 124.3 (C<sub>β</sub>), 17.3 (α-CH<sub>3</sub>), 15.1 (β-CH<sub>3</sub>); <sup>19</sup>F{<sup>1</sup>H} (376 MHz) δ<sub>F</sub> -112.47 [d+dd, 2 F, F<sup>2,6</sup>(C<sub>6</sub>F<sub>5</sub>), <sup>3</sup>J<sub>FF</sub> = 23, <sup>3</sup>J<sub>PIF</sub> = 358 Hz], -119.77 [d+dd, 2 F, F<sup>2,6</sup>(C<sub>6</sub>F<sub>5</sub>), <sup>3</sup>J<sub>FF</sub> = 23, <sup>3</sup>J<sub>PIF</sub> = 354 Hz], -159.87 [t, 1 F, F<sup>4</sup>(C<sub>6</sub>F<sub>5</sub>), <sup>3</sup>J<sub>FF</sub> = 19 Hz], -160.44 [t, 1 F, F<sup>4</sup>(C<sub>6</sub>F<sub>5</sub>), <sup>3</sup>J<sub>FF</sub> = 19 Hz], -163.58 [t, 2 F, F<sup>3,5</sup>(C<sub>6</sub>F<sub>5</sub>), <sup>3</sup>J<sub>FF</sub> ~ 25 Hz, 2<sup>nd</sup> order], -163.96 [t, 2 F, F<sup>3,5</sup>(C<sub>6</sub>F<sub>5</sub>), <sup>3</sup>J<sub>FF</sub> ~ 17 Hz, 2<sup>nd</sup> order]; <sup>195</sup>Pt{<sup>1</sup>H} (150 MHz) δ -4079.8 ppm (t.t.t.t. A<sub>2</sub>B<sub>2</sub>C<sub>2</sub>D<sub>2</sub>X approximating to A<sub>4</sub>B<sub>4</sub>X p.p. as <sup>3</sup>J<sub>AX</sub> ~ <sup>3</sup>J<sub>BX</sub> >> <sup>4</sup>J<sub>CX</sub> ~ <sup>4</sup>J<sub>DX</sub>. <sup>3</sup>J<sub>FPI</sub> ~ 344, <sup>4</sup>J<sub>FPI</sub> ~ 83 Hz). IR (CH<sub>2</sub>Cl<sub>2</sub>) ν<sub>CO</sub> = 2084(vs), 2053(vs), 2014(vs) cm<sup>-1</sup>. HR-MS (ESI, MeCN) found *m/z* 798.8942 (calc. for C<sub>21</sub>H<sub>12</sub>O<sub>1</sub><sup>75</sup>AsCoF<sub>10</sub><sup>195</sup>Pt [M - 2CO]<sup>+</sup>: 798.8936). Analysis found: C, 32.41; H, 1.35%; calc. for C<sub>23</sub>H<sub>12</sub>O<sub>3</sub>AsCoF<sub>10</sub>Pt: C, 32.30; H, 1.41%.

Single crystals of **4** suitable for X-ray diffraction were grown from evaporation of Et<sub>2</sub>O solution at -30 °C. A suitable crystal was selected and mounted in oil on a Micromount™ mylar loop and fixed under a cold stream of nitrogen. Data were collected using an Agilent Technologies Supernova/EosS2-CCD diffractometer with graphite monochromated Cu-K<sub>α</sub> radiation (λ = 1.54184 Å) at 150.0(1) K. Data were processed using the CrysAlisPRO-CCD and -RED software packages<sup>11</sup> and a spherical absorption correction was applied (T<sub>min</sub> / T<sub>max</sub> = 0.14128 / 0.23775). The structure was solved within Olex2<sup>12</sup> with SHELXT<sup>13</sup> using Intrinsic Phasing and refined with the SHELXL<sup>14</sup> refinement package using Least-Squares against F<sup>2</sup> in an anisotropic (for non-hydrogen atoms) approximation. Aliphatic hydrogen atom positions were refined in isotropic approximation in a “riding” model with the U<sub>iso</sub>(H) parameters fixed to 1.5 U<sub>eq</sub>(C), where U<sub>eq</sub>(C) is the equivalent thermal parameter of the carbon atom to which the corresponding H atom is bonded. The crystal comprised a single enantiomer Principal crystallographic data and refinement parameters are as follows: C<sub>23</sub>H<sub>12</sub>AsCoF<sub>10</sub>O<sub>3</sub>Pt (M<sub>w</sub> = 855.27 gmol<sup>-1</sup>): orange prism, 0.264 × 0.12 × 0.067 mm, orthorhombic, space group P2<sub>1</sub>2<sub>1</sub>2<sub>1</sub> (no. 19), a = 9.18910(10) Å, b = 12.75590(10) Å, c = 21.0227(2) Å, V = 2464.18(4) Å<sup>3</sup>, Z = 4, μ(Cu Kα) = 18.190 mm<sup>-1</sup>, ρ<sub>calc</sub> = 2.305 Mgm<sup>-3</sup>, 8725 reflections measured (8.108° ≤ 2θ ≤ 147.49°), 4597 unique (R<sub>int</sub> = 0.0233, R<sub>sigma</sub> = 0.0328) which were used in all calculations, GOF = 1.056, D<sub>min</sub> / D<sub>max</sub> = -1.50 / 1.21 eÅ<sup>-3</sup>. The final R<sub>1</sub> was 0.0292 (I > 2σ(I)) and wR<sub>2</sub> was 0.0714 (all data). CCDC number 2130787.

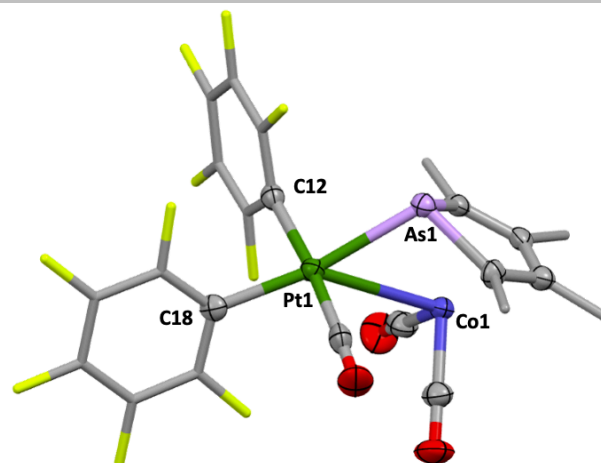

**Figure S22:** (a) The molecular structure of **5** (Methyl and pentafluorophenyl groups simplified, 50% displacement ellipsoids, Pt TBPY-5-12-C enantiomer in non-centrosymmetric P<sub>2</sub>1<sub>2</sub>1<sub>2</sub>1 space group). Selected distances [Å] and angles [°]: As1-Pt1 2.5185(8), Co1-Pt1 2.996(1), Pt1-C3 1.889(9), Pt1-C12 2.053(8), Pt-C18 2.077(7), As1-Pt1-Co1 53.04(3), As1-Pt1-C18 169.58(2), Co1-Pt1-C18 137.24(2).

#### 4.11 [(Co(CO)<sub>2</sub>(μ:σ,η<sup>5</sup>-AsC<sub>4</sub>Me<sub>4</sub>)<sub>2</sub>Au)[Au(C<sub>6</sub>F<sub>5</sub>)<sub>2</sub>] (**5**)

To a stirred solution of **2c** (110 mg, 0.37 mmol) in CH<sub>2</sub>Cl<sub>2</sub> (5 mL) was added solid Au(C<sub>6</sub>F<sub>5</sub>)<sub>2</sub>(THT) (150 mg, 0.33 mmol). After stirring overnight, the mixture was filtered through a short (2 x 2 cm) Celite® plug and the filtrate dried under reduced pressure. The yellow solids obtained were then washed with Et<sub>2</sub>O (3 x 3 mL portions). Re-crystallisation from the minimum amount of CH<sub>2</sub>Cl<sub>2</sub>/Et<sub>2</sub>O at -20 °C overnight provided 180 mg of the product as a yellow microcrystalline solid in 84 % isolated yield (based on Au). The product is readily soluble in polar organic solvents and may be handled in air as a solid or solution for a short while however turns brown overnight. NMR (CD<sub>2</sub>Cl<sub>2</sub>, 25 °C): <sup>1</sup>H (400 MHz) δ 2.33 (s, 6H, α-CH<sub>3</sub>), 1.70 (s, 6H, β-CH<sub>3</sub>); <sup>13</sup>C{<sup>1</sup>H} (176 MHz) δ 200.2 (CO), 149.5 (m, C<sub>6</sub>F<sub>5</sub>), 138.7 (m, C<sub>6</sub>F<sub>5</sub>), 138.3 (m, C<sub>6</sub>F<sub>5</sub>), 137.35 (m, C<sub>6</sub>F<sub>5</sub>), 122.7 (C<sub>α</sub>), 118.0 (C<sub>β</sub>), 18.2 (α-CH<sub>3</sub>), 14.4 (β-CH<sub>3</sub>); <sup>19</sup>F{<sup>1</sup>H} δ -115.63 [d, 2 F, <sup>3</sup>J<sub>FF</sub> = 30 Hz F<sup>2,6</sup>(C<sub>6</sub>F<sub>5</sub>)], -163.00 (t, 1 F, <sup>3</sup>J<sub>FF</sub> = 21 Hz F<sup>4</sup>(C<sub>6</sub>F<sub>5</sub>)), -164.16 [dd, 2 F, <sup>3</sup>J<sub>FF</sub> ~ 23 Hz, F<sup>3,5</sup>(C<sub>6</sub>F<sub>5</sub>)]; IR (CH<sub>2</sub>Cl<sub>2</sub>) ν<sub>CO</sub> = 2062 (sh), 2051(vs), 2009(vs) cm<sup>-1</sup>; HR-MS (ESI, MeCN) found *m/z* 792.8439 (calc. for C<sub>20</sub>H<sub>24</sub>O<sub>4</sub><sup>75</sup>As<sub>2</sub><sup>197</sup>AuCo<sub>2</sub> [M]<sup>+</sup>: 792.8436). Analysis found: C, 29.03; H, 1.87%; calc. for C<sub>32</sub>H<sub>24</sub>O<sub>4</sub>As<sub>2</sub>Au<sub>2</sub>Co<sub>2</sub>F<sub>10</sub>: C, 29.03; H, 1.83%.

Single crystals of **5** suitable for X-ray diffraction were grown from the vapour diffusion of Et<sub>2</sub>O into CH<sub>2</sub>Cl<sub>2</sub> solution at -30 °C. A suitable crystal was selected and mounted in oil on a Micromount™ mylar loop and fixed under a cold stream of nitrogen. Data were collected using an Agilent Technologies Supernova/EosS2-CCD diffractometer with graphite monochromated Cu-K<sub>α</sub> radiation (λ = 1.54184 Å) at 150.0(1) K. Data were processed using the CrysAlisPRO-CCD and -RED software packages<sup>11</sup> and a spherical absorption correction was applied (T<sub>min</sub> / T<sub>max</sub> = 0.10891 / 0.20750). The structure was solved within Olex2<sup>12</sup> with SHELXT<sup>13</sup> using Intrinsic Phasing and refined with the SHELXL<sup>14</sup> refinement package using Least-Squares against F<sup>2</sup> in an anisotropic (for non-hydrogen atoms)

approximation. Aliphatic hydrogen atom positions were refined in isotropic approximation in a “riding” model with the  $U_{\text{iso}}(\text{H})$  parameters fixed to 1.5  $U_{\text{eq}}(\text{C})$ , where  $U_{\text{eq}}(\text{C})$  is the equivalent thermal parameter of the carbon atom to which the corresponding H atom is bonded. Principal crystallographic data and refinement parameters are as follows:  $\text{C}_{32}\text{H}_{24}\text{O}_4\text{As}_2\text{Au}_2\text{Co}_2\text{F}_{10}\text{O}_4$  ( $M_w = 1324.14 \text{ g mol}^{-1}$ ): yellow needle,  $0.346 \times 0.085 \times 0.08 \text{ mm}$ , triclinic, space group  $P\bar{1}$  (no. 2),  $a = 15.12080(10) \text{ \AA}$ ,  $b = 21.7675(2) \text{ \AA}$ ,  $c = 23.8537(2) \text{ \AA}$ ,  $\alpha = 100.2830(10)^\circ$ ,  $\beta = 104.7800(10)^\circ$ ,  $\gamma = 91.0780(10)^\circ$ ,  $V = 7452.43(11) \text{ \AA}^3$ ,  $Z = 8$ ,  $\mu(\text{Cu-K}\alpha) = 24.075 \text{ mm}^{-1}$ ,  $\rho_{\text{calc}} = 2.360 \text{ Mgm}^{-3}$ , 149532 reflections measured ( $7.102^\circ \leq 2\Theta \leq 146.294^\circ$ ), 29642 unique ( $R_{\text{int}} = 0.0391$ ,  $R_{\text{sigma}} = 0.0298$ ) which were used in all calculations,  $\text{GOF} = 1.041$ ,  $D_{\text{min}} / D_{\text{max}} = -1.82 / 1.22 \text{ e/\AA}^3$ . The final  $R_1$  was 0.0265 ( $I > 2\sigma(I)$ ) and  $wR_2$  was 0.0631 (all data). CCDC number 2130790.

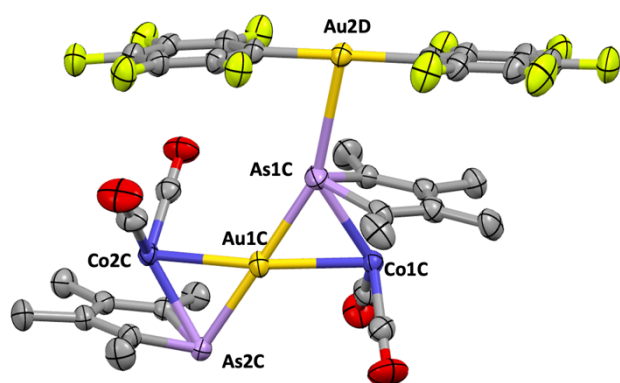

**Figure S23.** Molecular structure of the repeating unit of infinite chains of **5n** (Hydrogen atoms omitted for clarity, four crystallographically independent molecules in the unit cell, 50% displacement ellipsoids).

**5. Selected spectra**



-ELECTRONIC SUPPORTING INFORMATION-

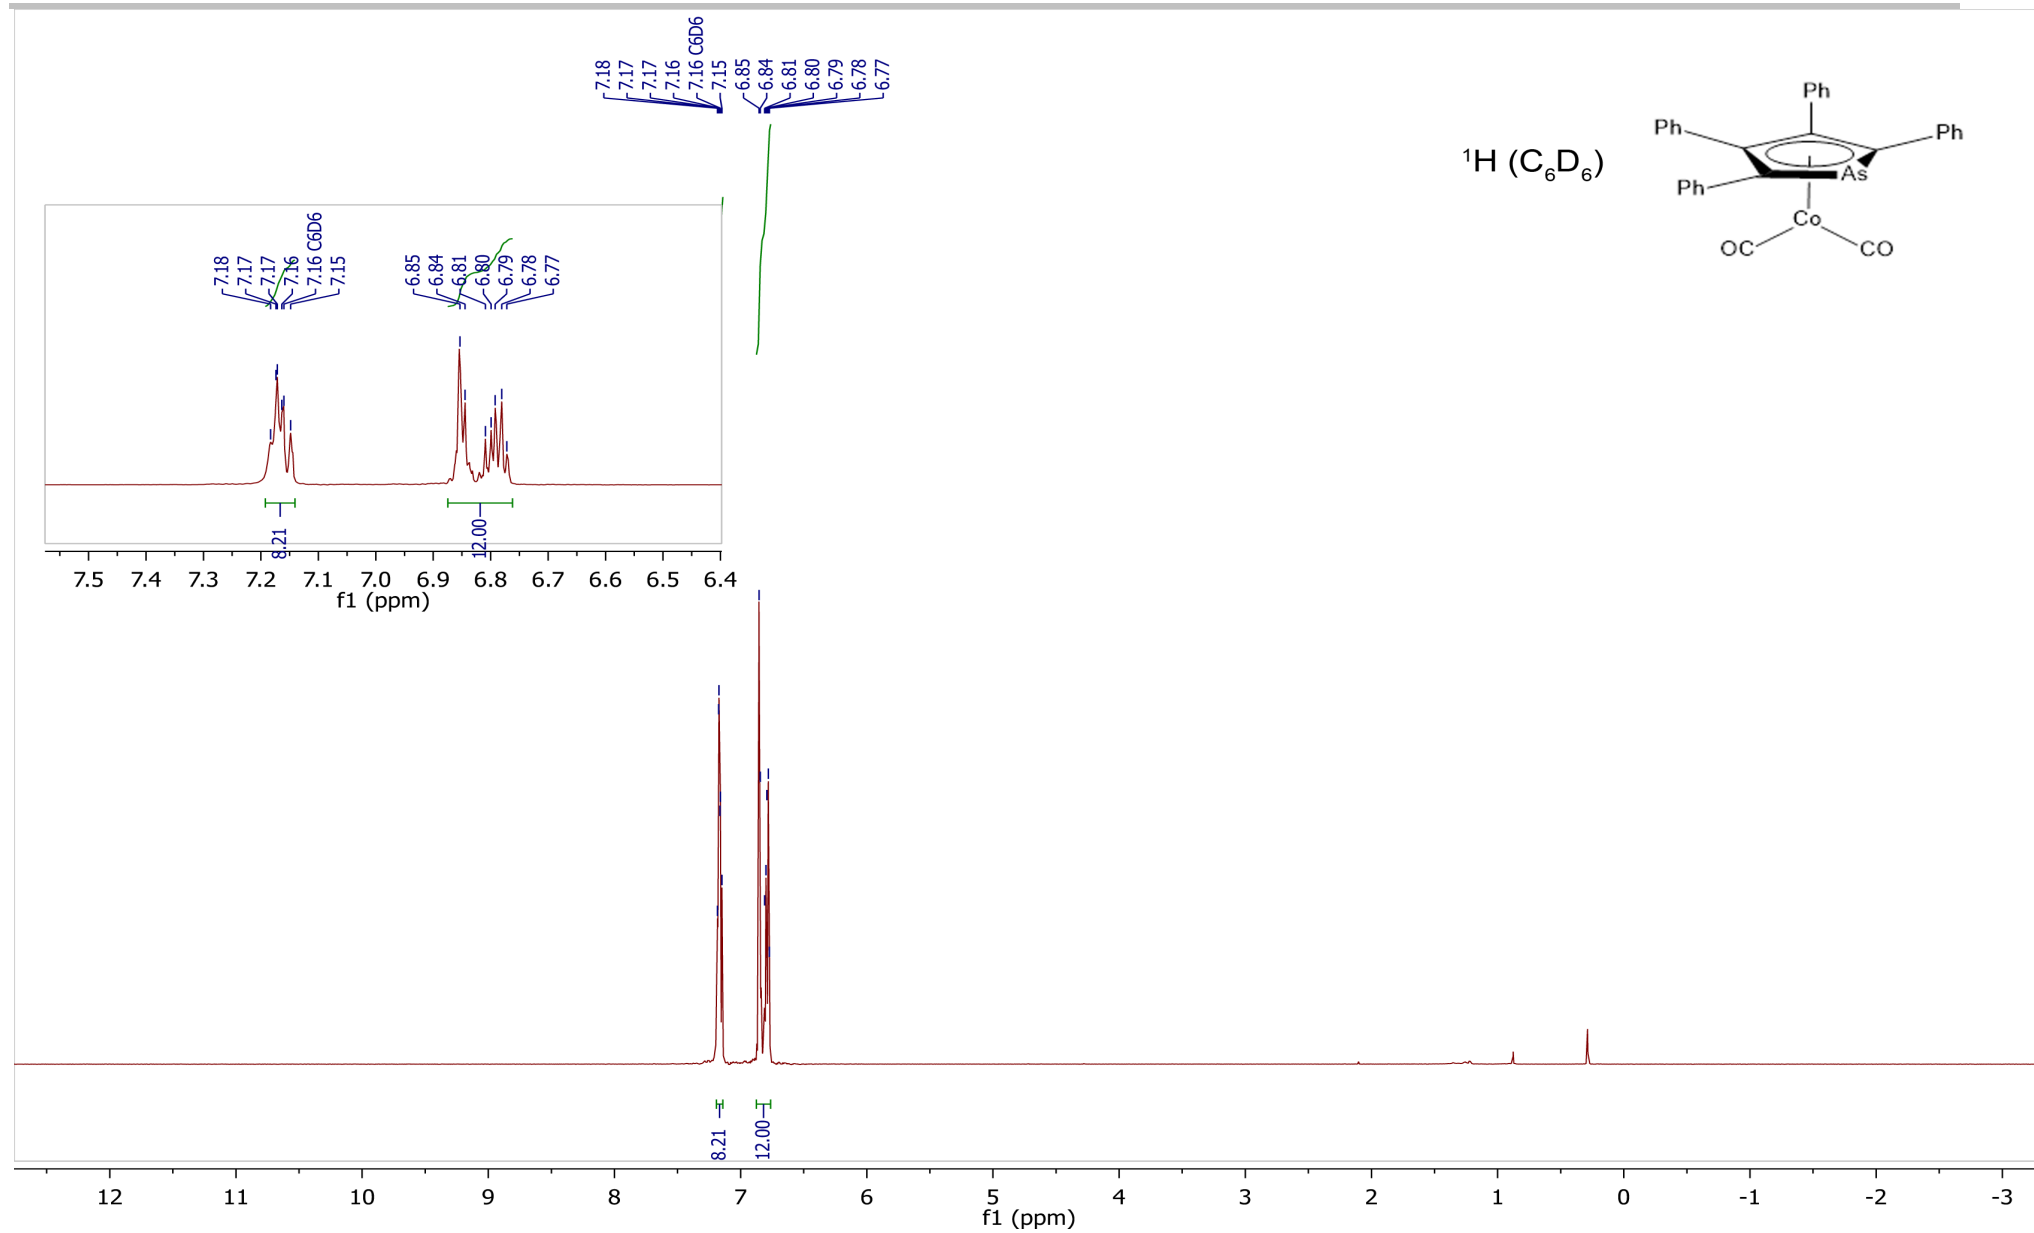

-ELECTRONIC SUPPORTING INFORMATION-

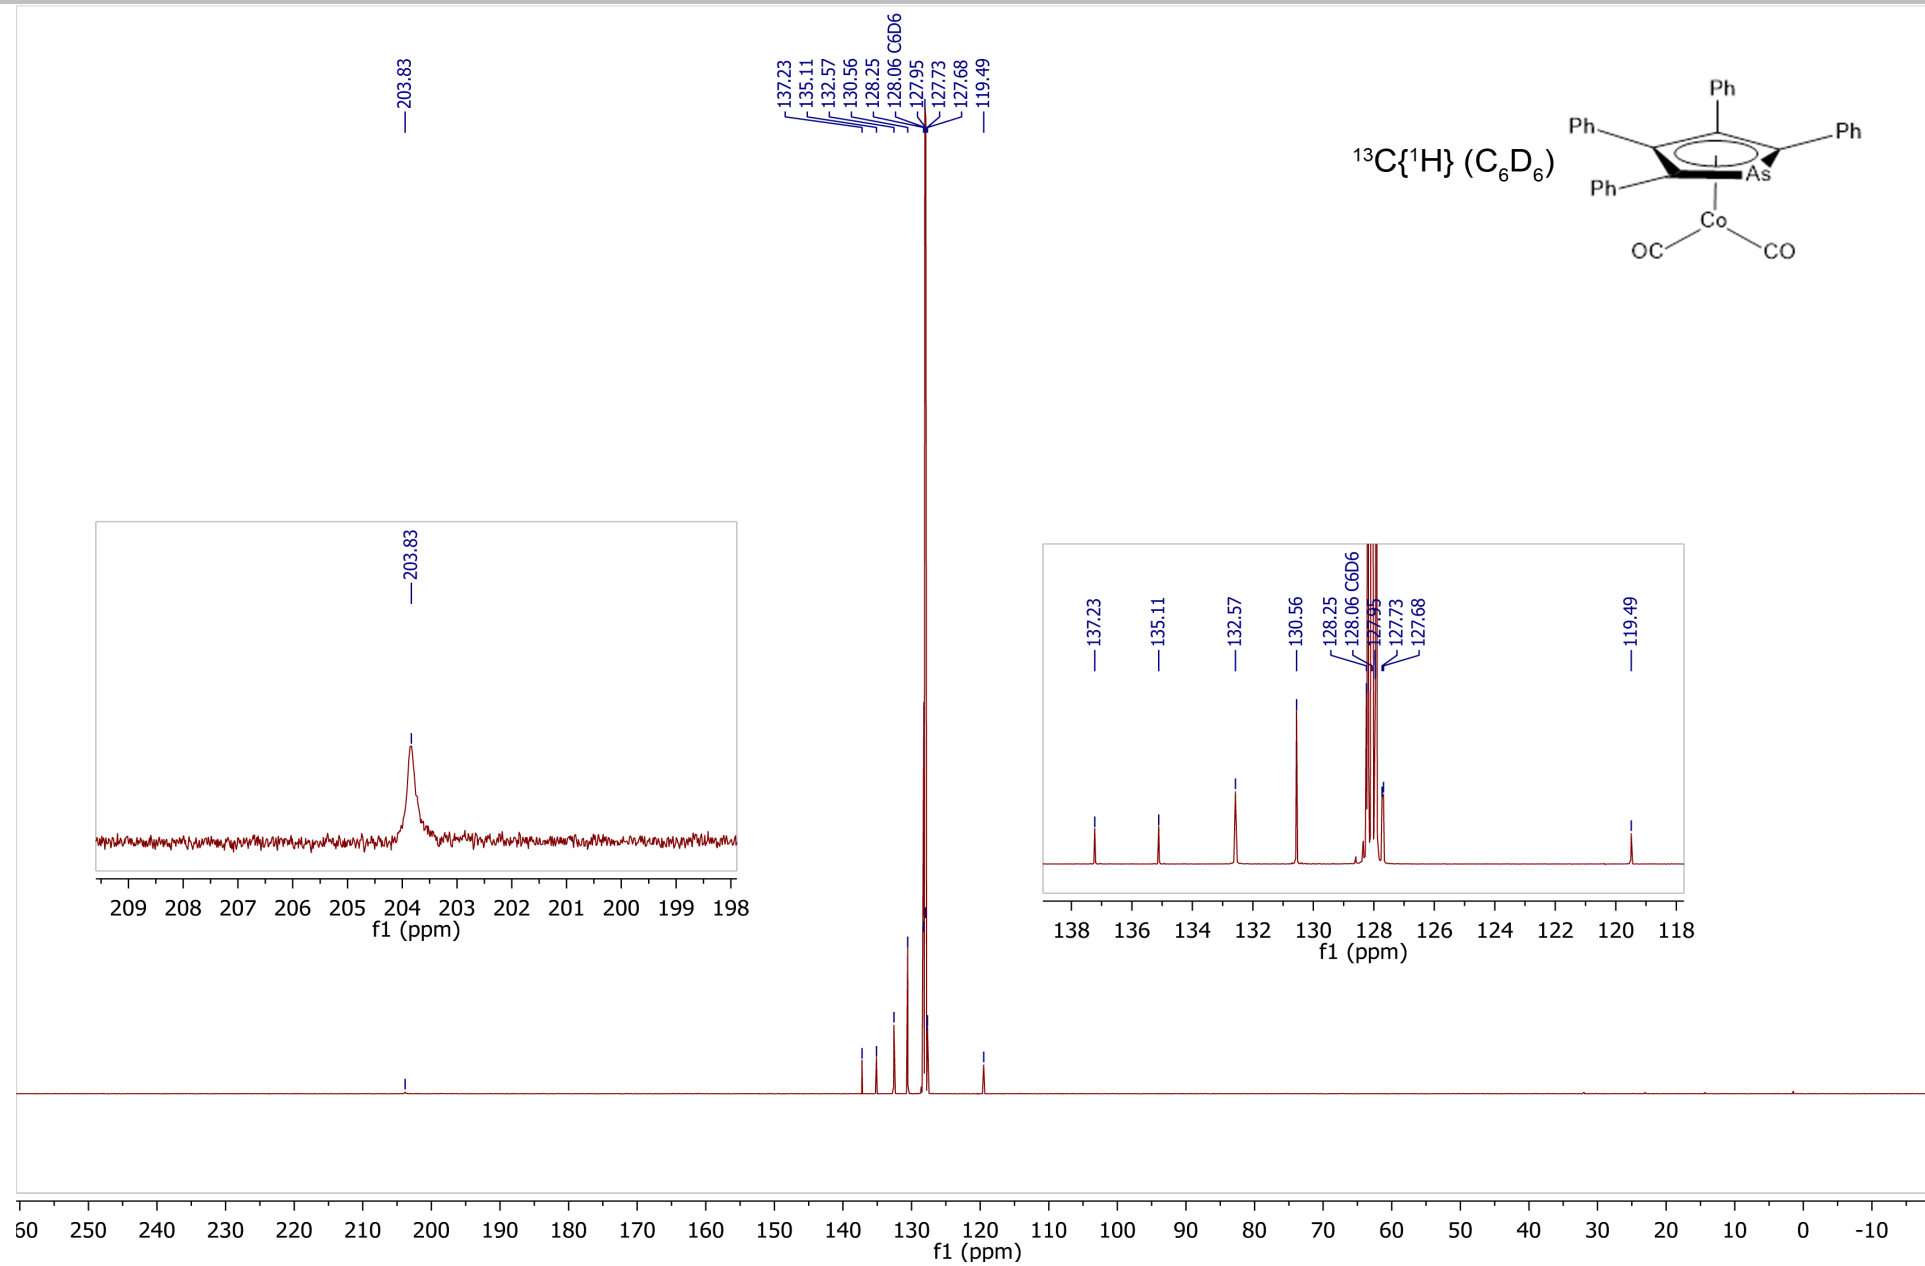

-ELECTRONIC SUPPORTING INFORMATION-

RMK-124-EI/AJ  
65262

Autospec Premier

06-Mar-2020

13:36:36

HR0033AFAMM (1.674) Is (1.00,1.00) C<sub>30</sub>H<sub>20</sub>AsCoO<sub>2</sub>

Magnet EI+  
7.12e12

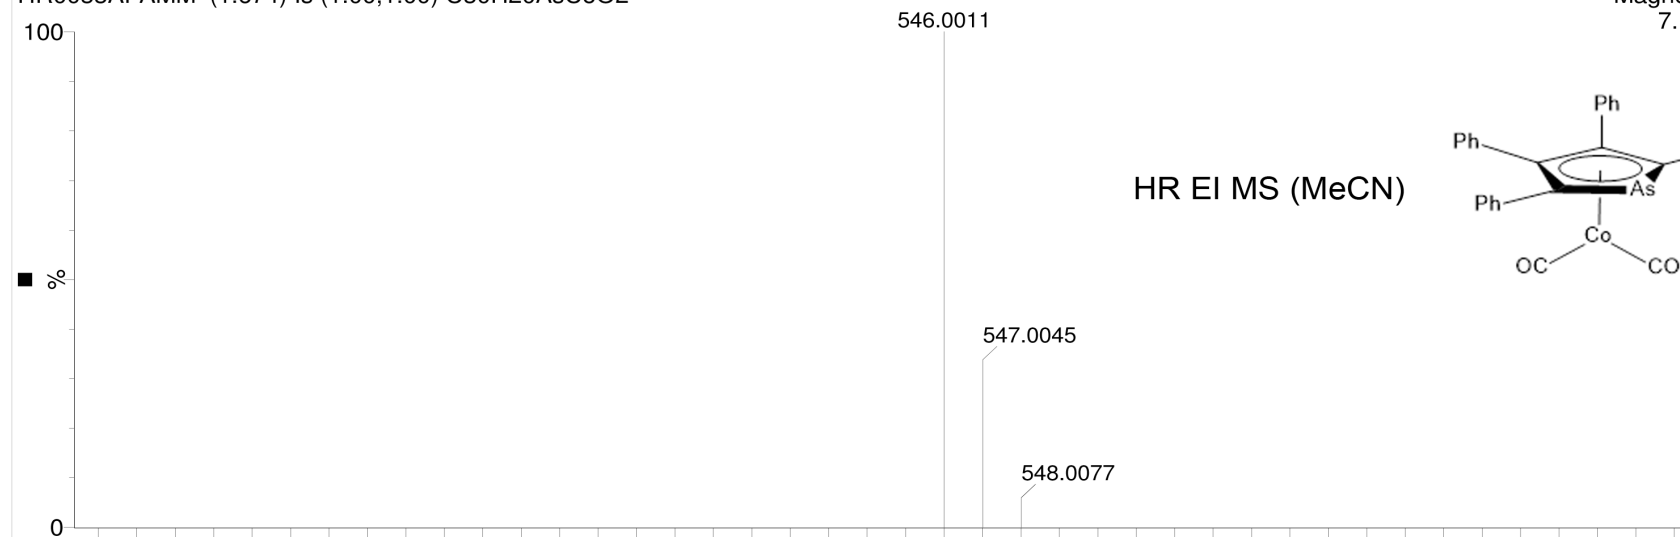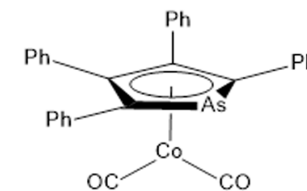

HR0033AFAMM 42 (1.674)

Magnet EI+  
737

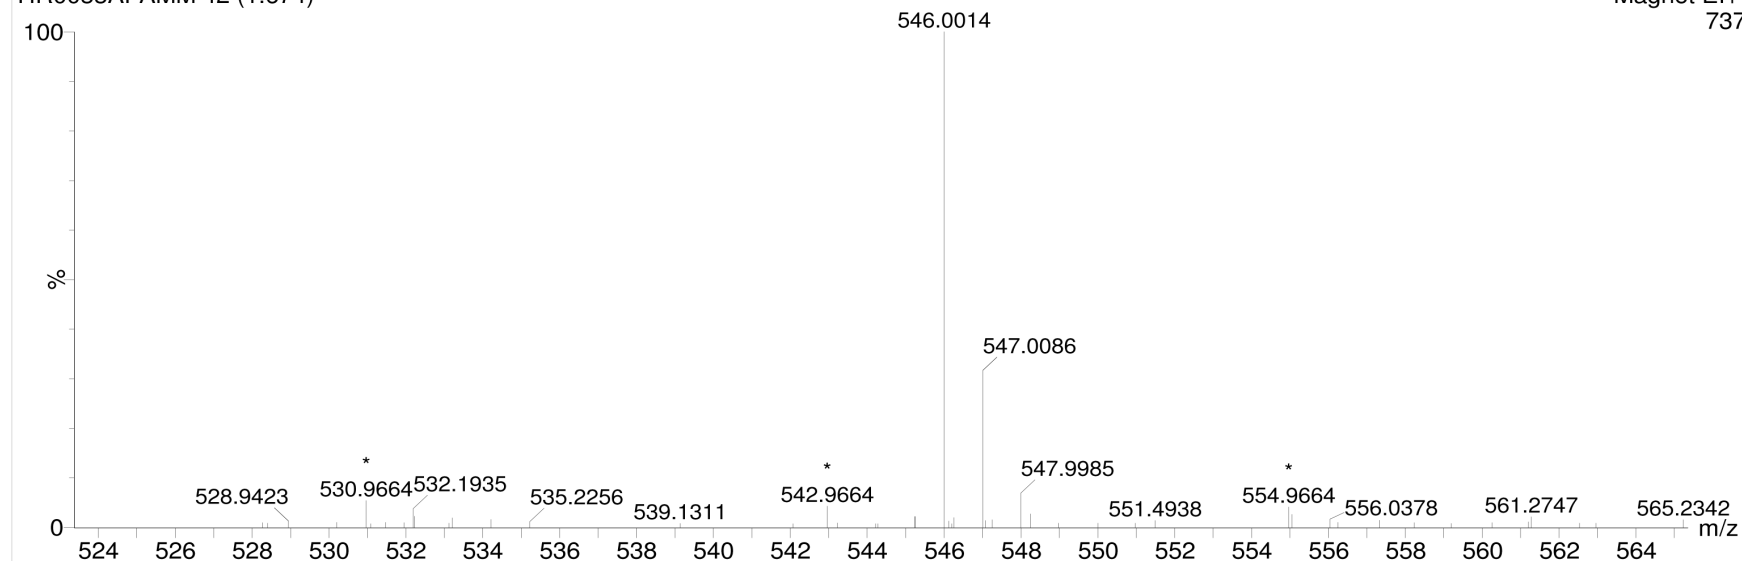

-ELECTRONIC SUPPORTING INFORMATION-

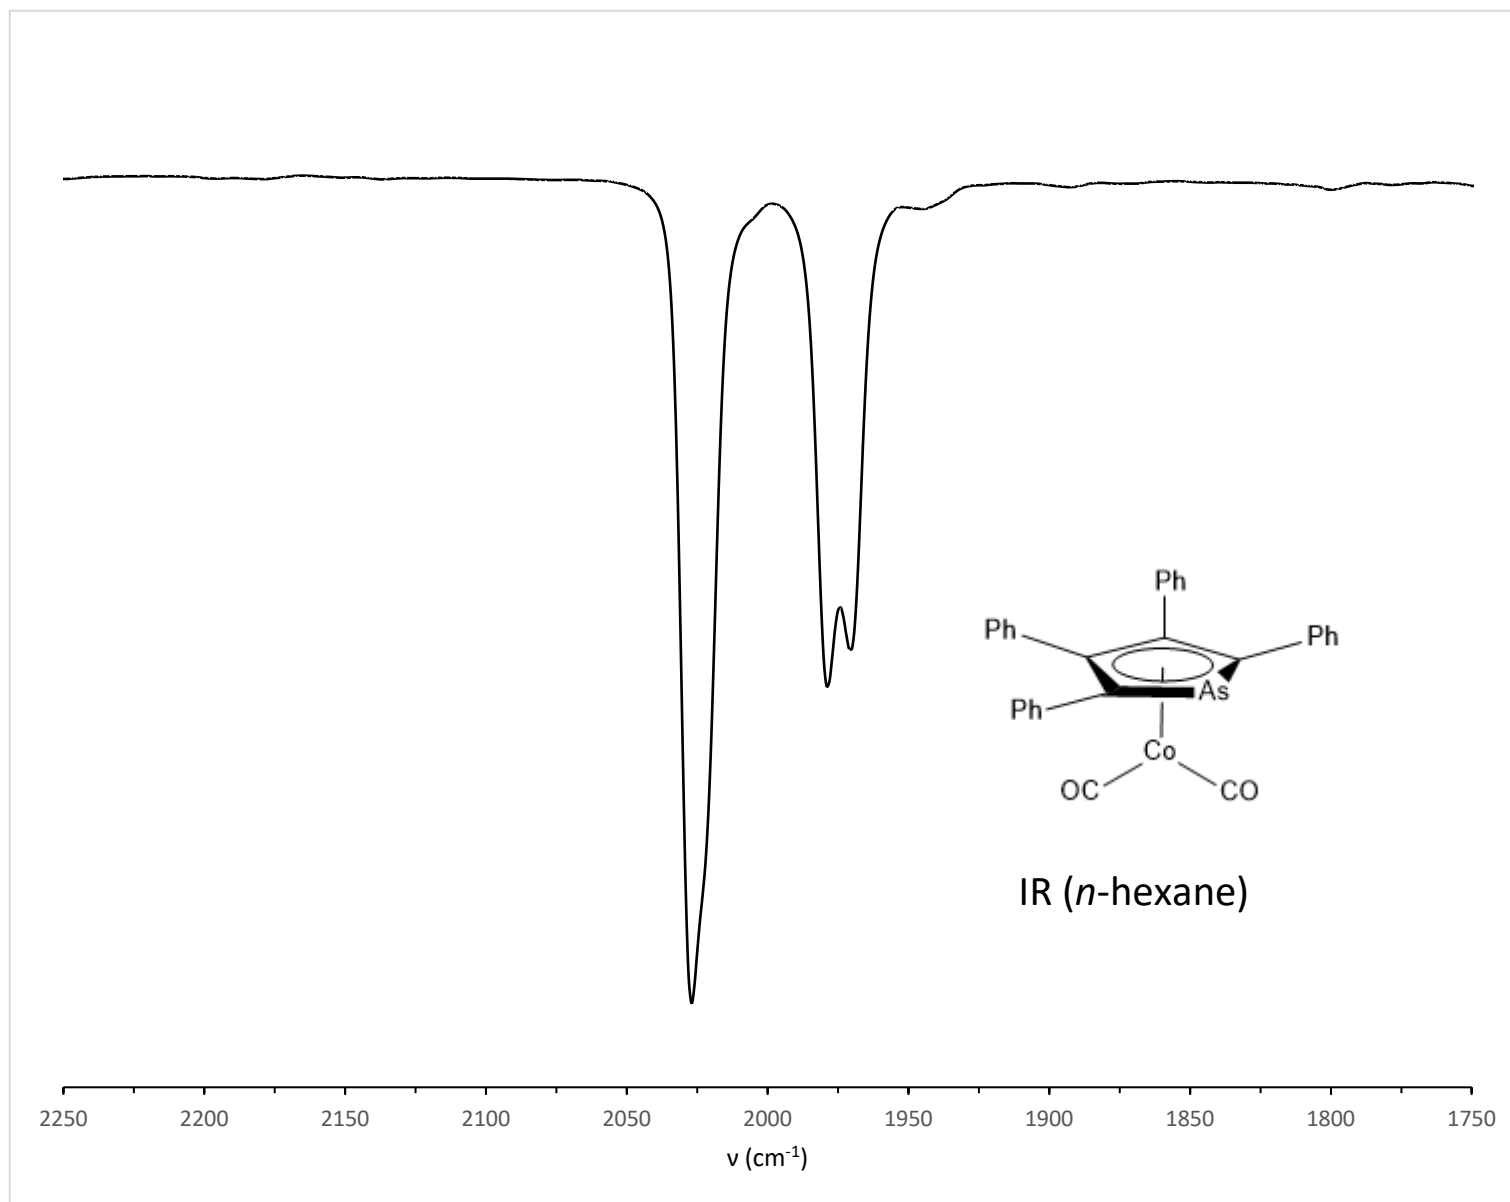

-ELECTRONIC SUPPORTING INFORMATION-

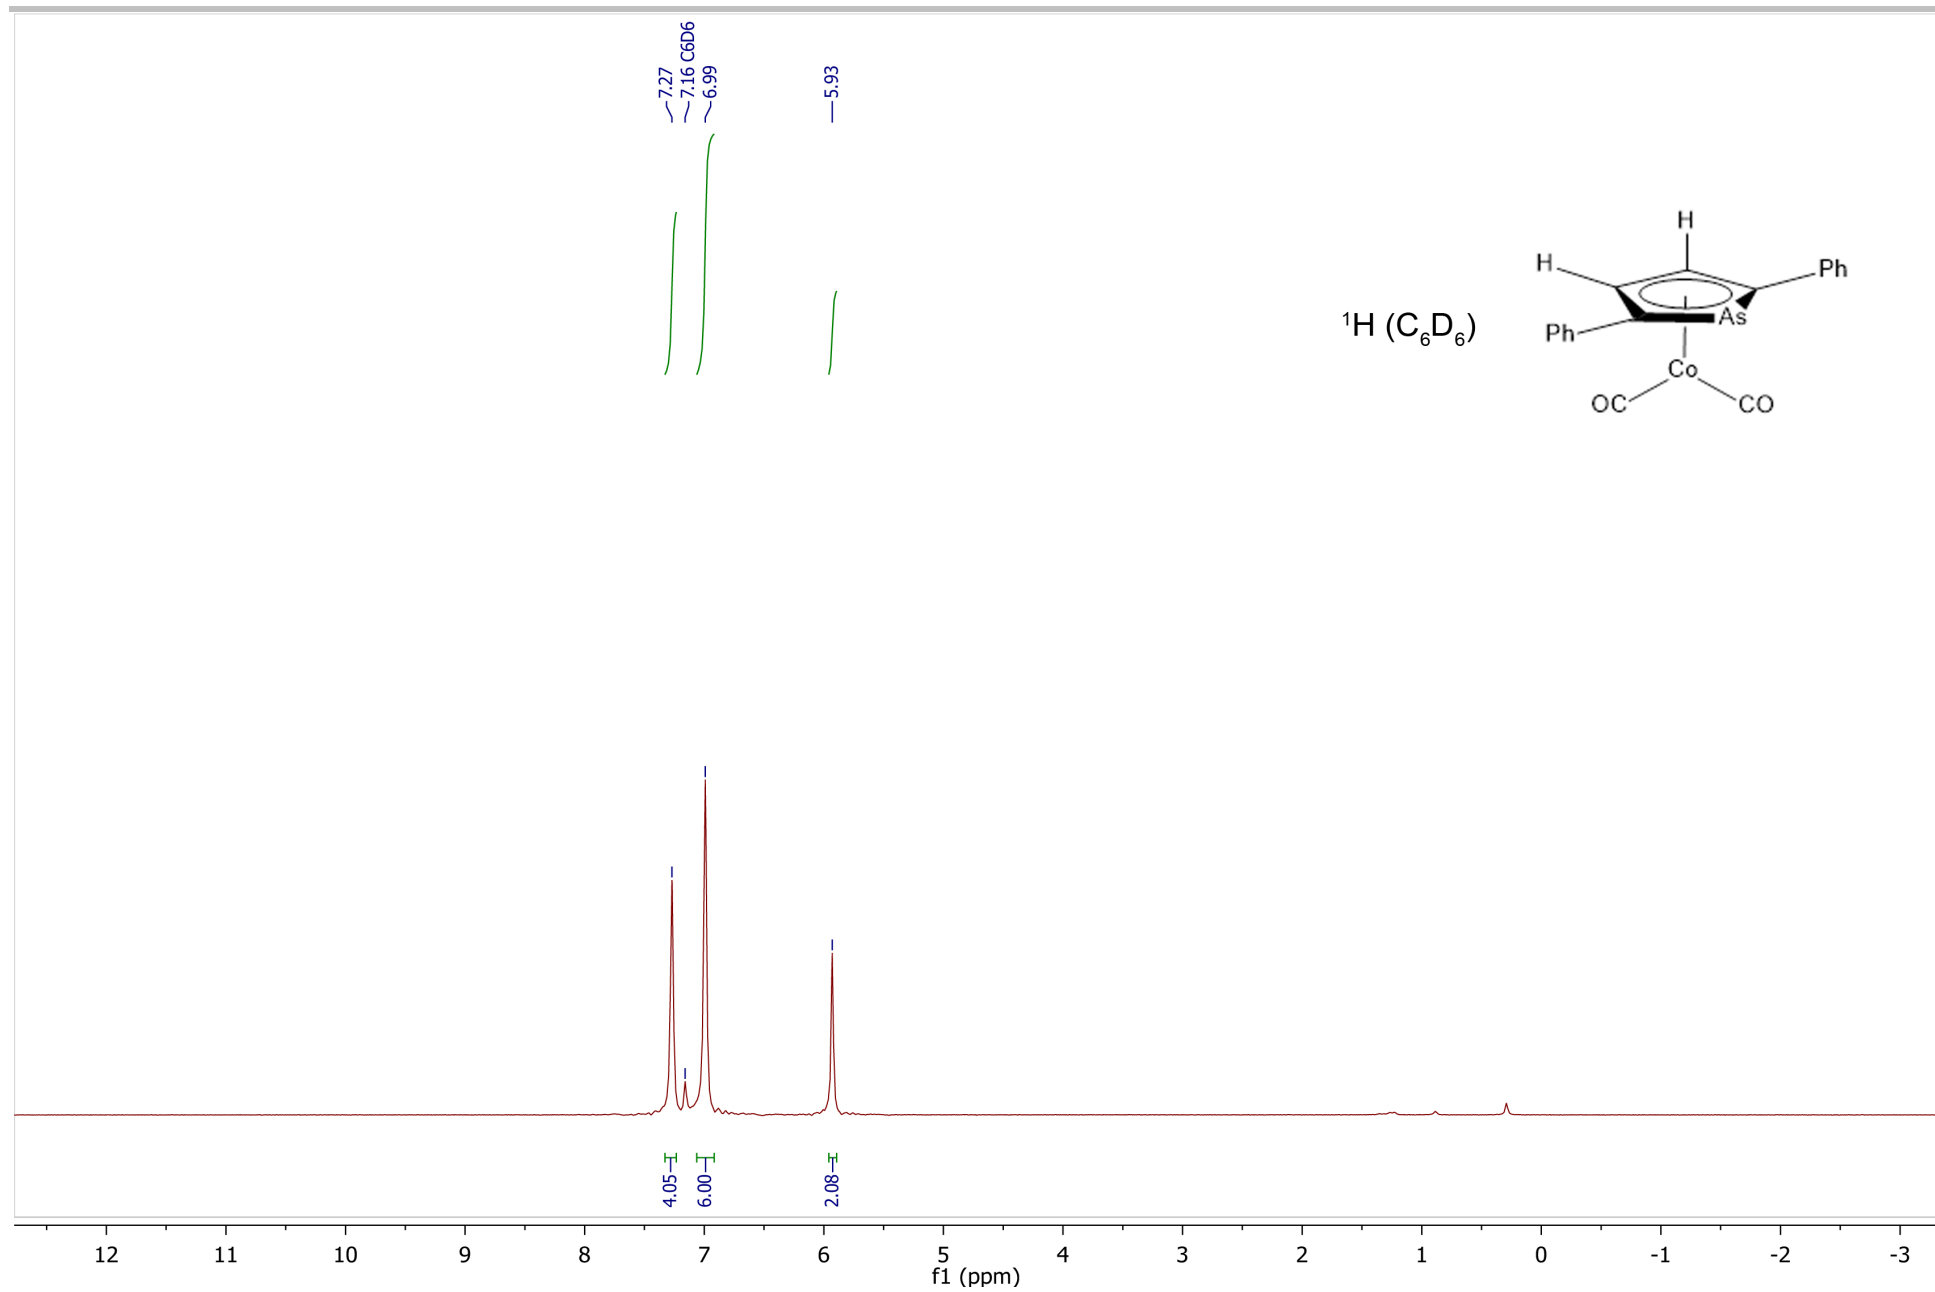

-ELECTRONIC SUPPORTING INFORMATION-

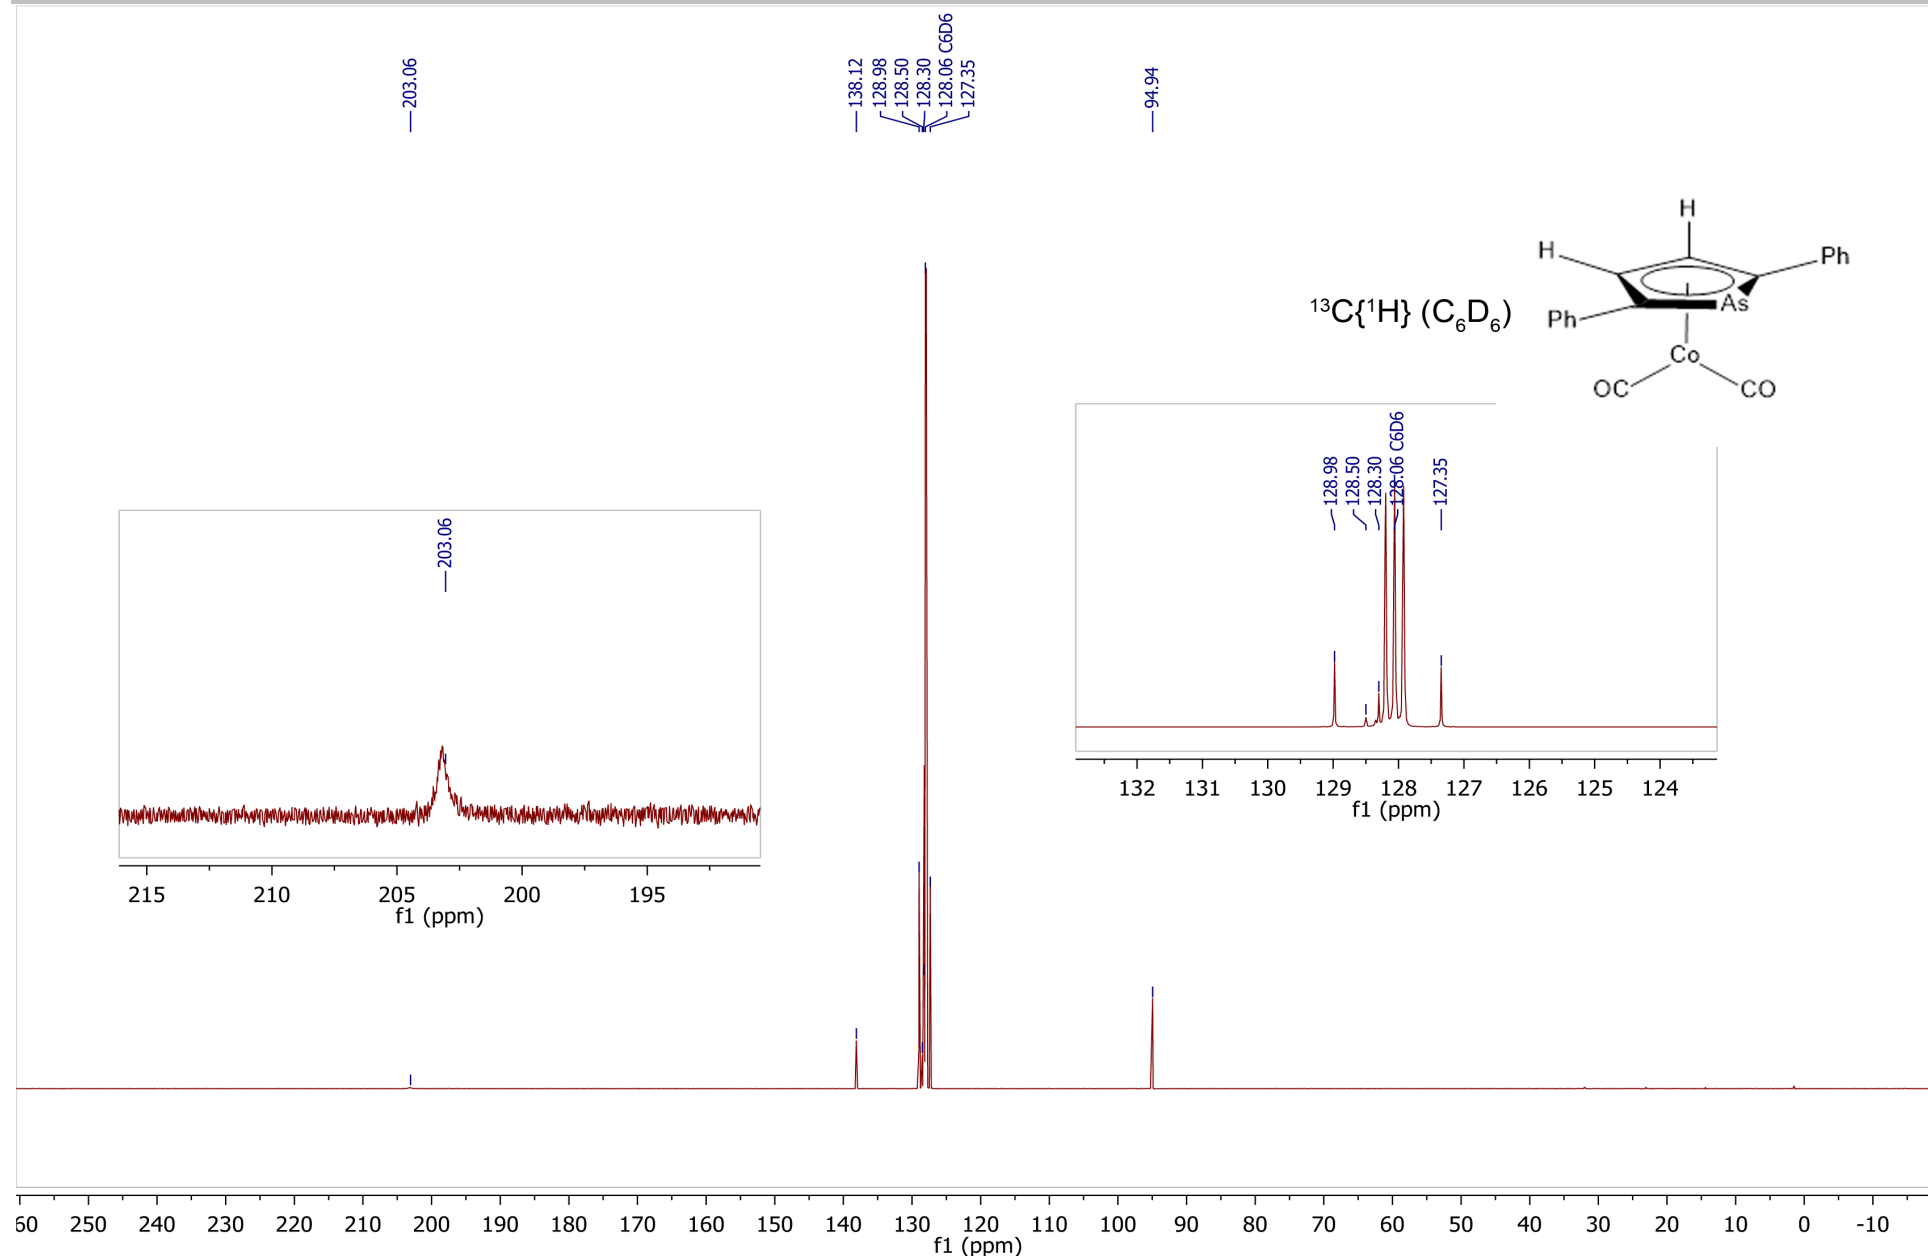

-ELECTRONIC SUPPORTING INFORMATION-

RMK-129-EI/AJ  
65263

Autospec Premier

06-Mar-2020

14:38:20

HR0034AFAMM (0.877) Is (1.00,1.00) C<sub>18</sub>H<sub>12</sub>AsCoO<sub>2</sub>

Magnet EI+  
8.14e12

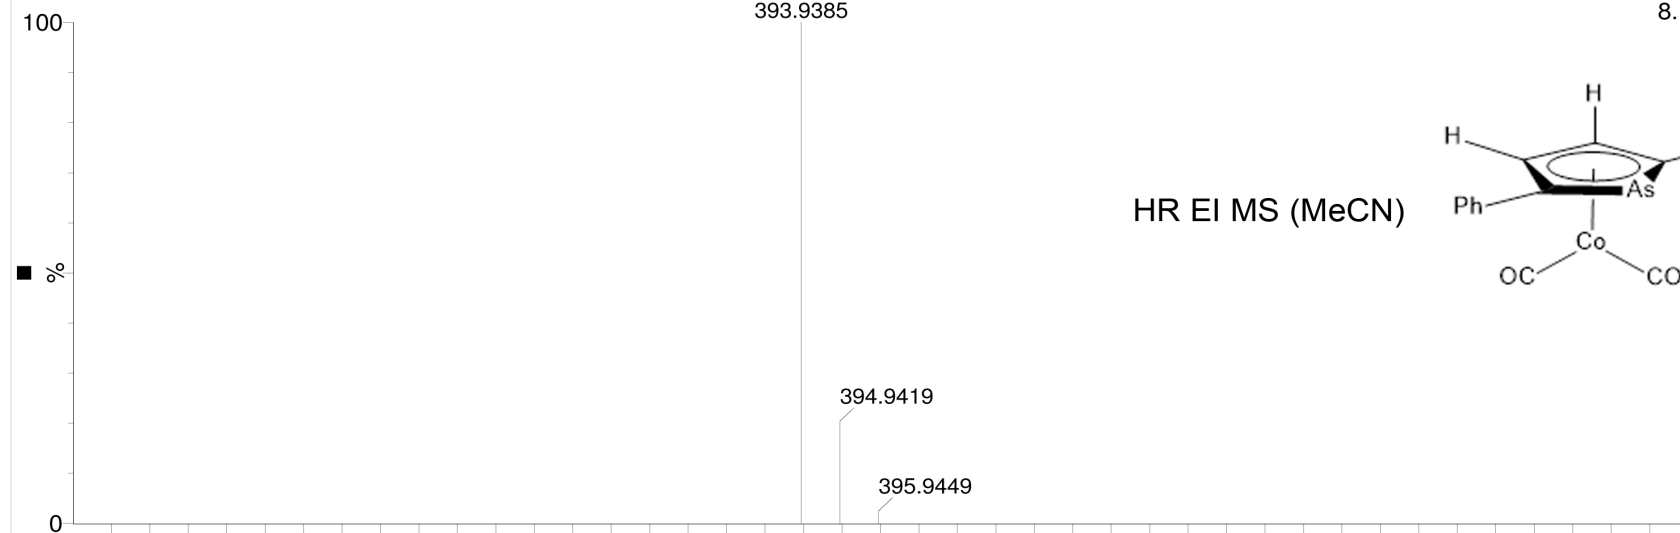

HR0034AFAMM 22 (0.877)

Magnet EI+  
5.10e3

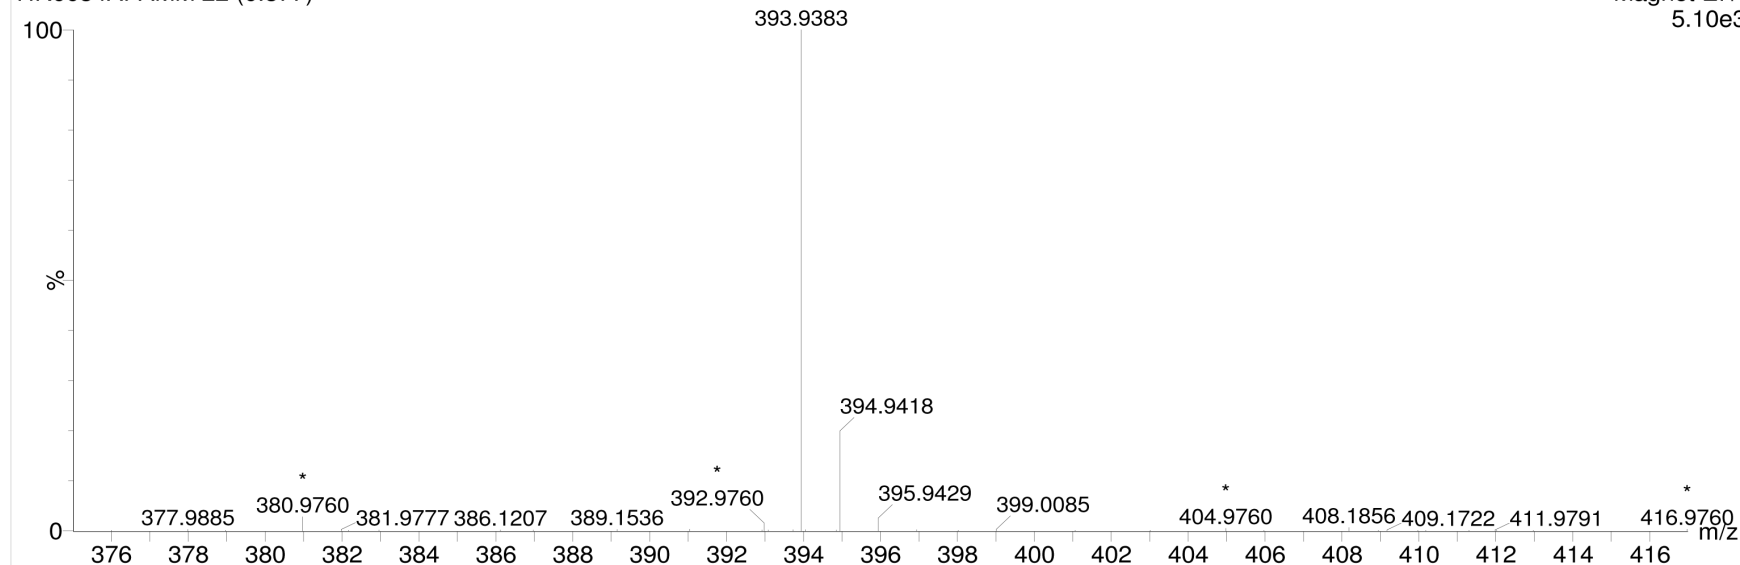



-ELECTRONIC SUPPORTING INFORMATION-

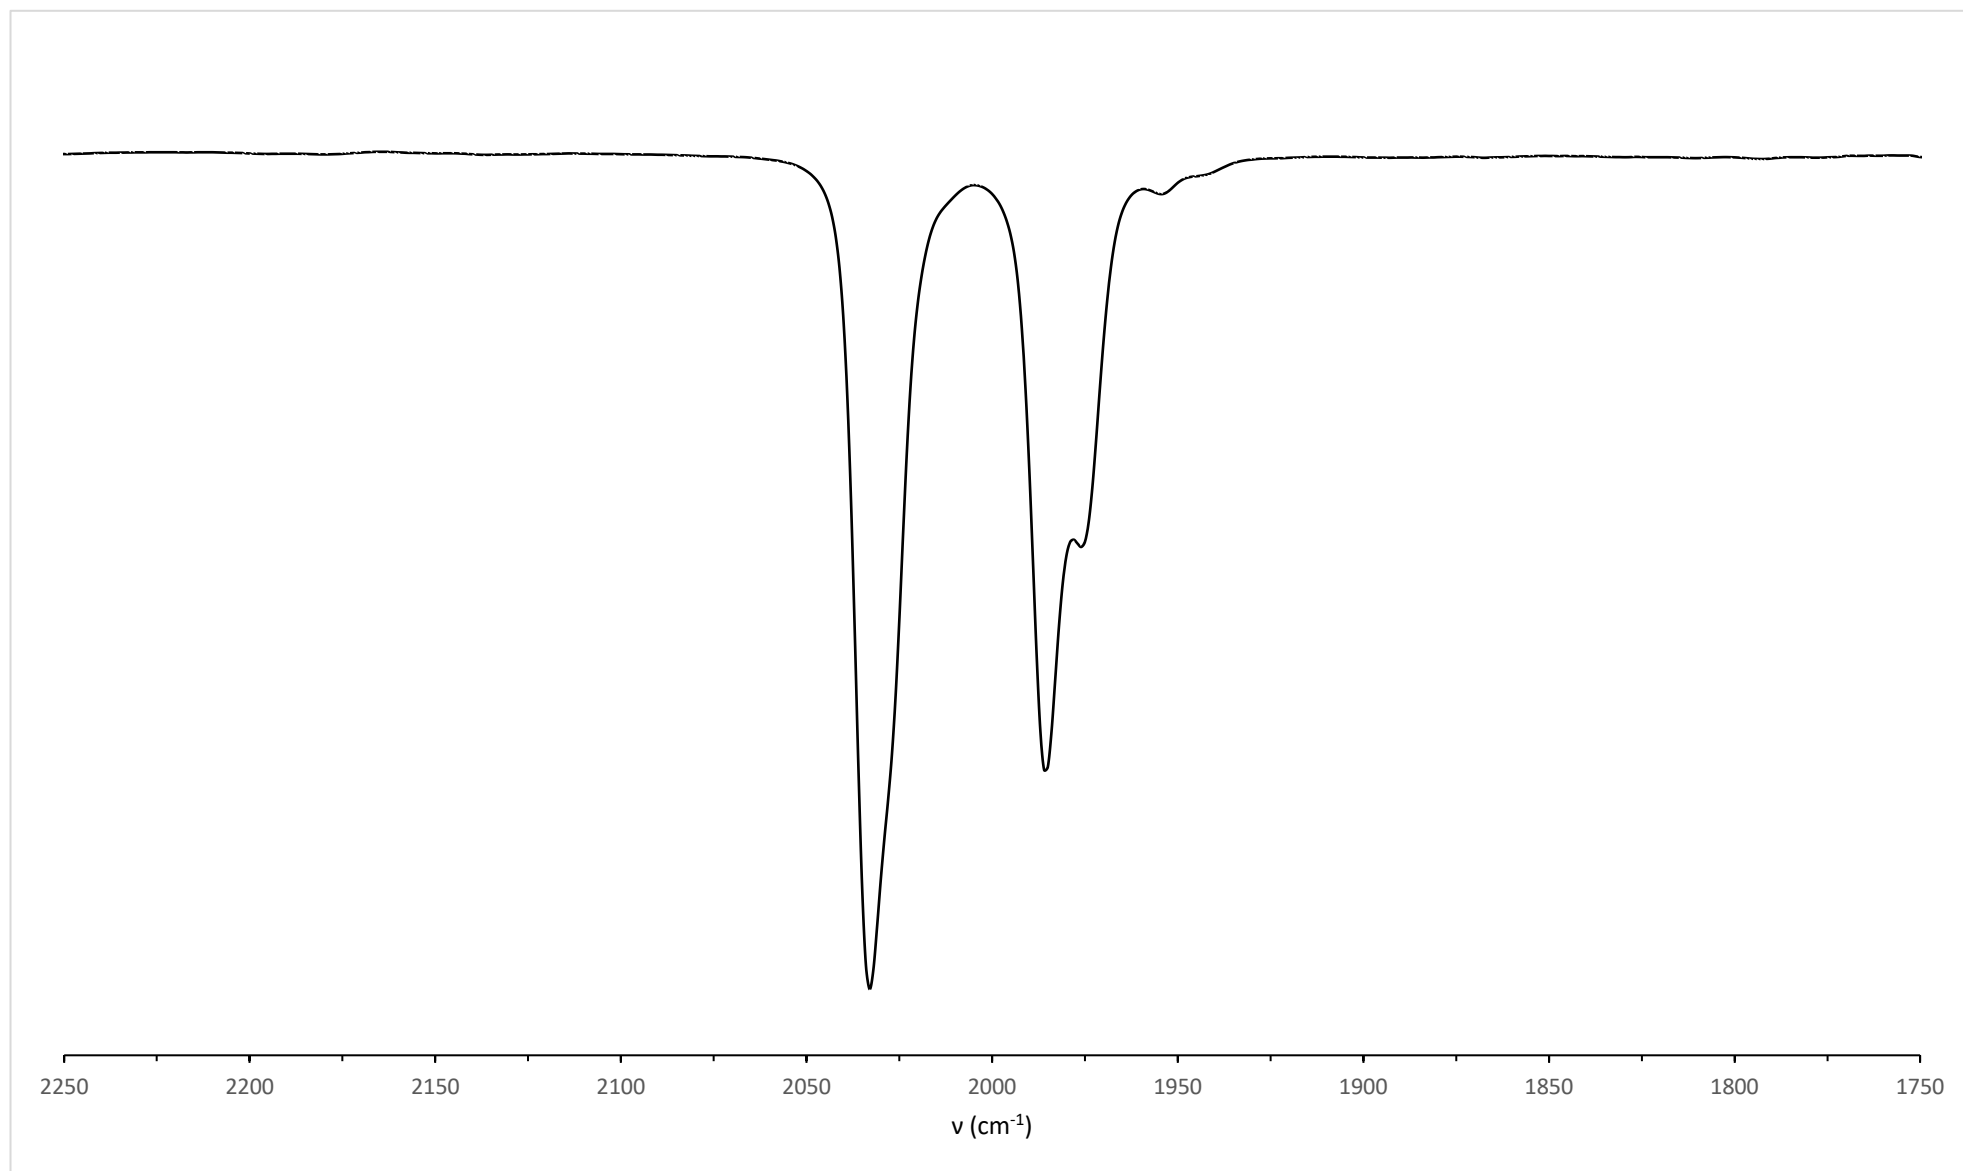

-ELECTRONIC SUPPORTING INFORMATION-

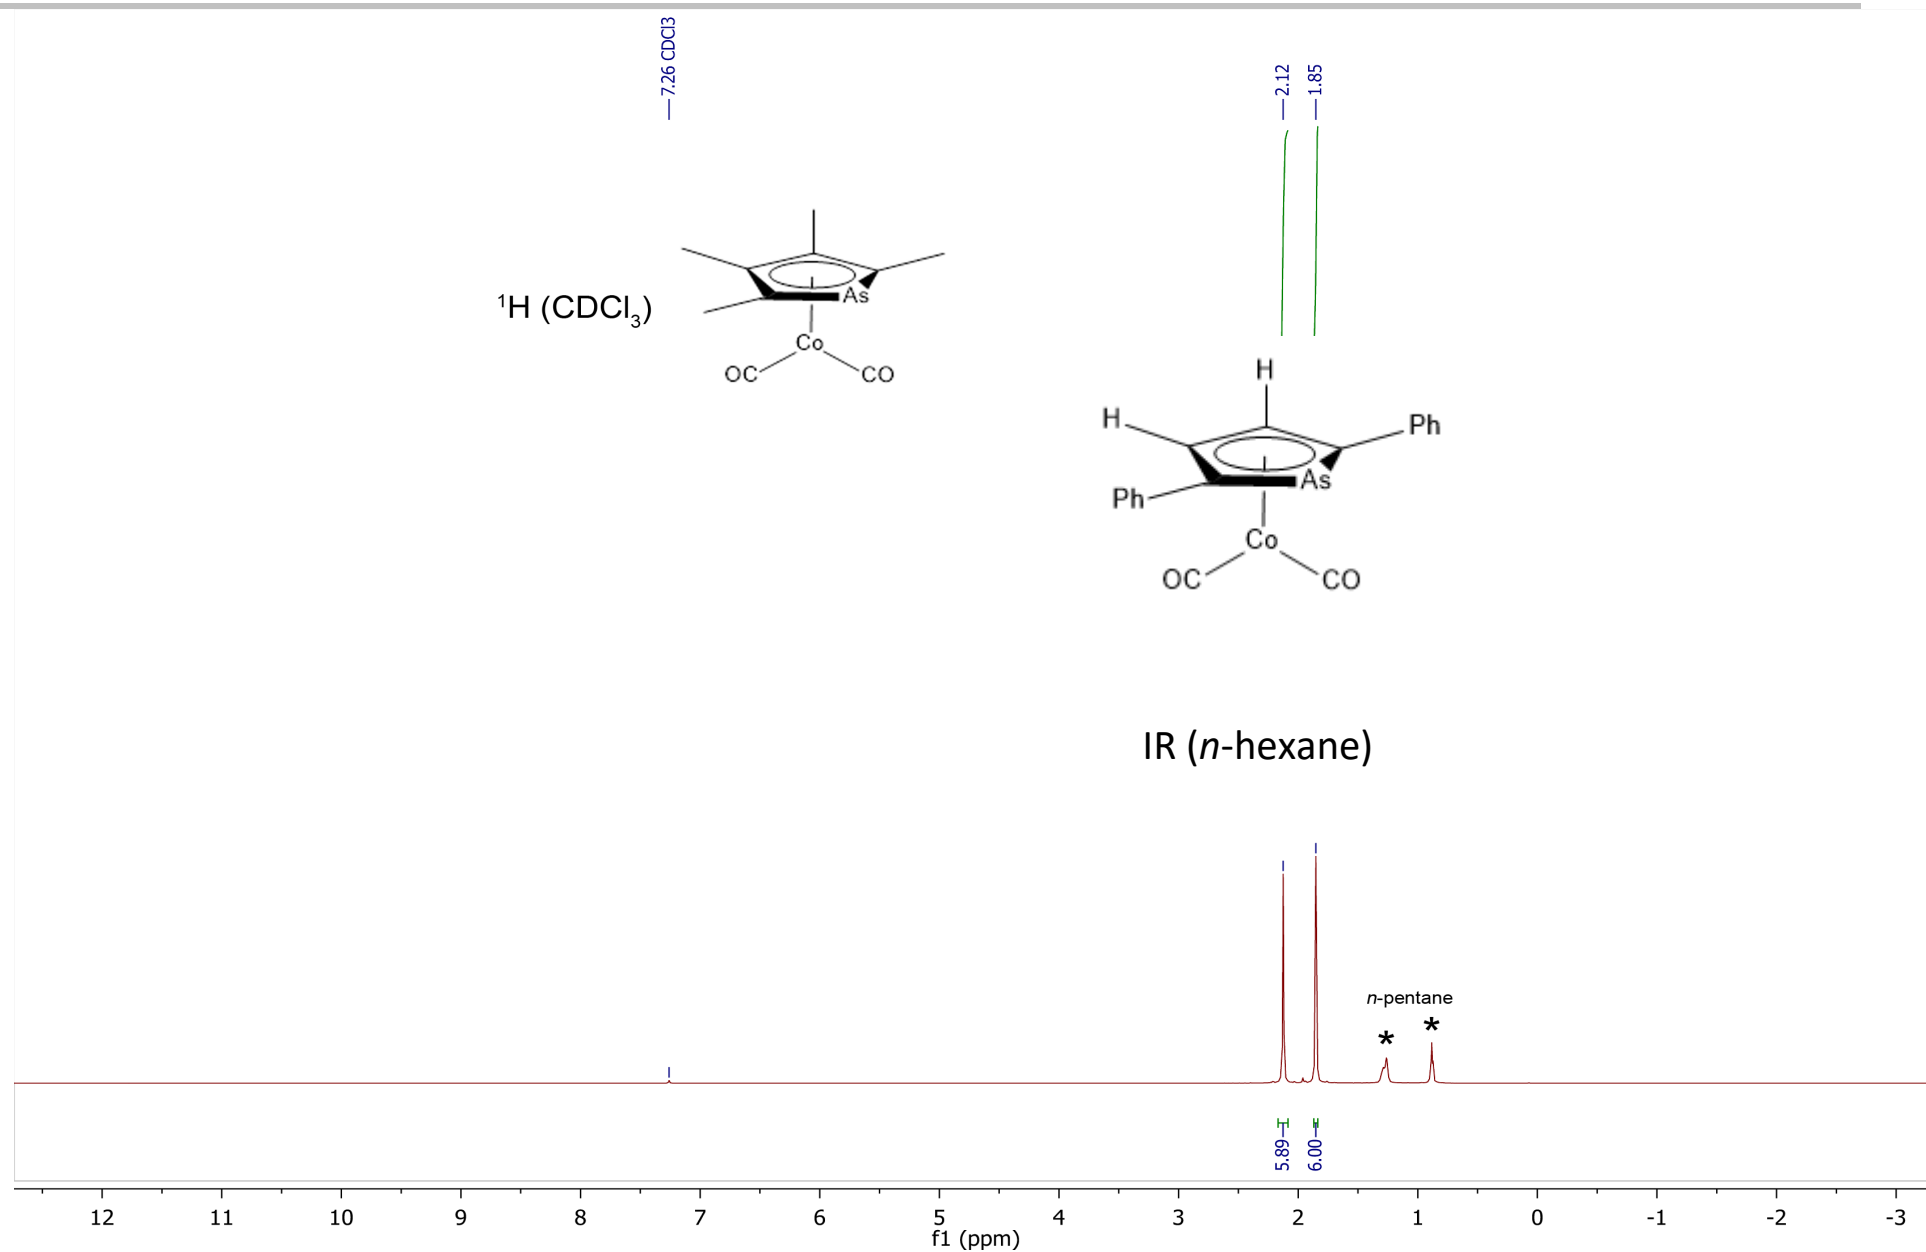

-ELECTRONIC SUPPORTING INFORMATION-

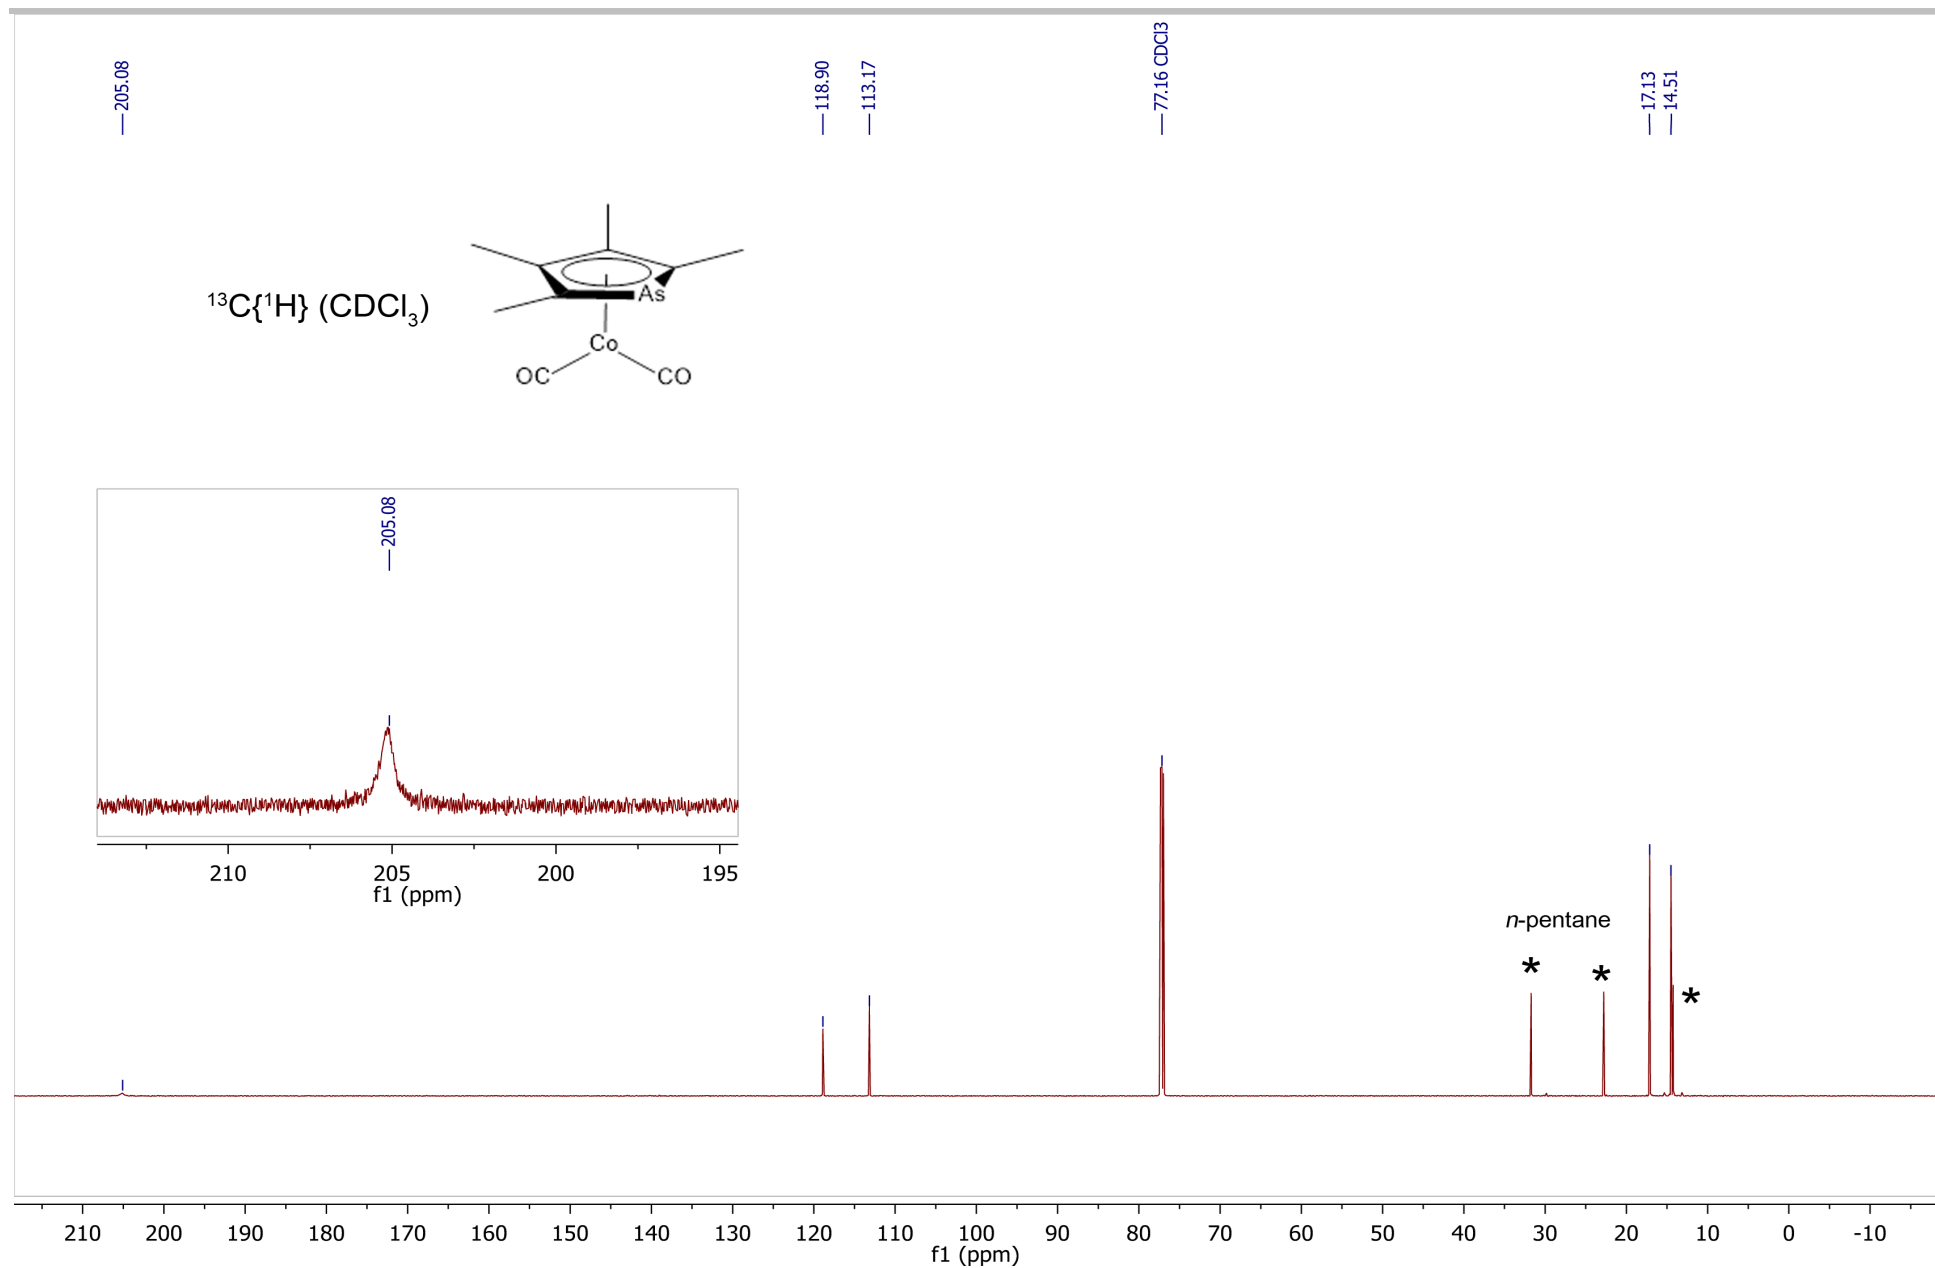

-ELECTRONIC SUPPORTING INFORMATION-

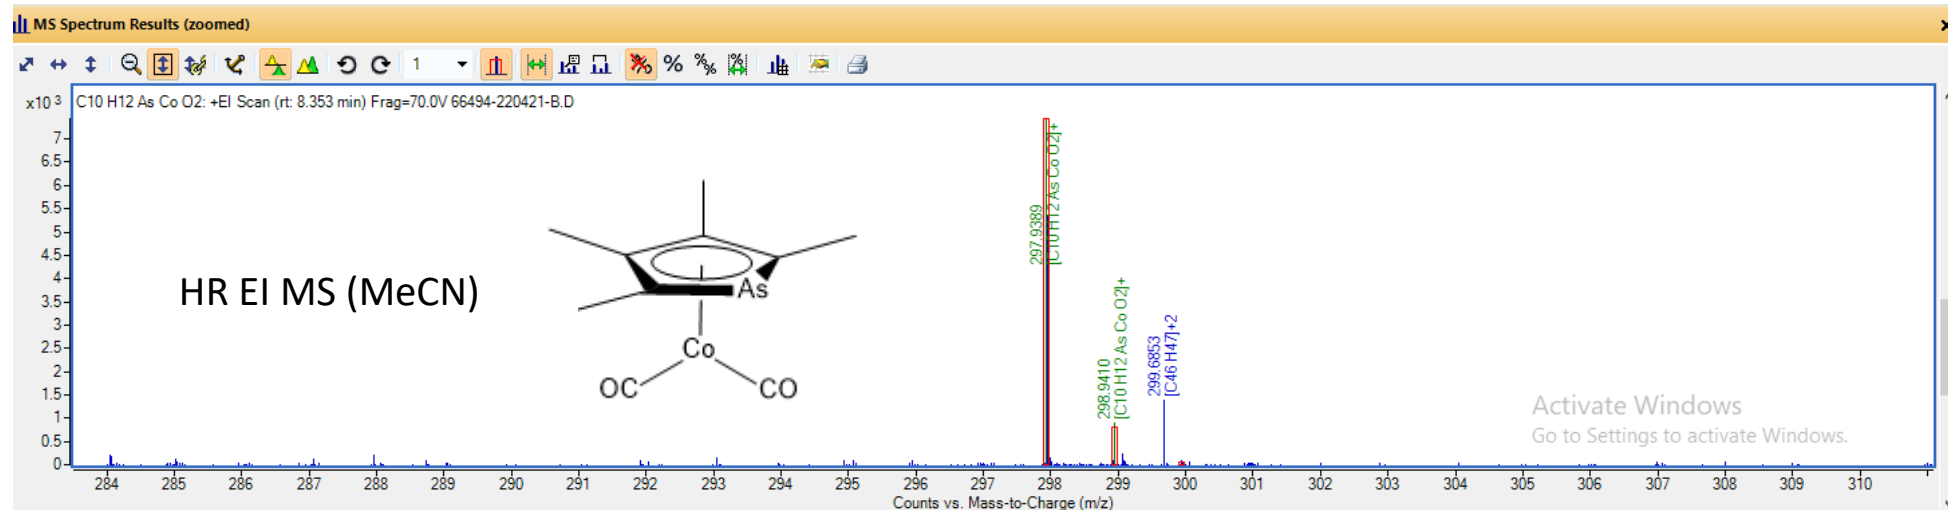

-ELECTRONIC SUPPORTING INFORMATION-

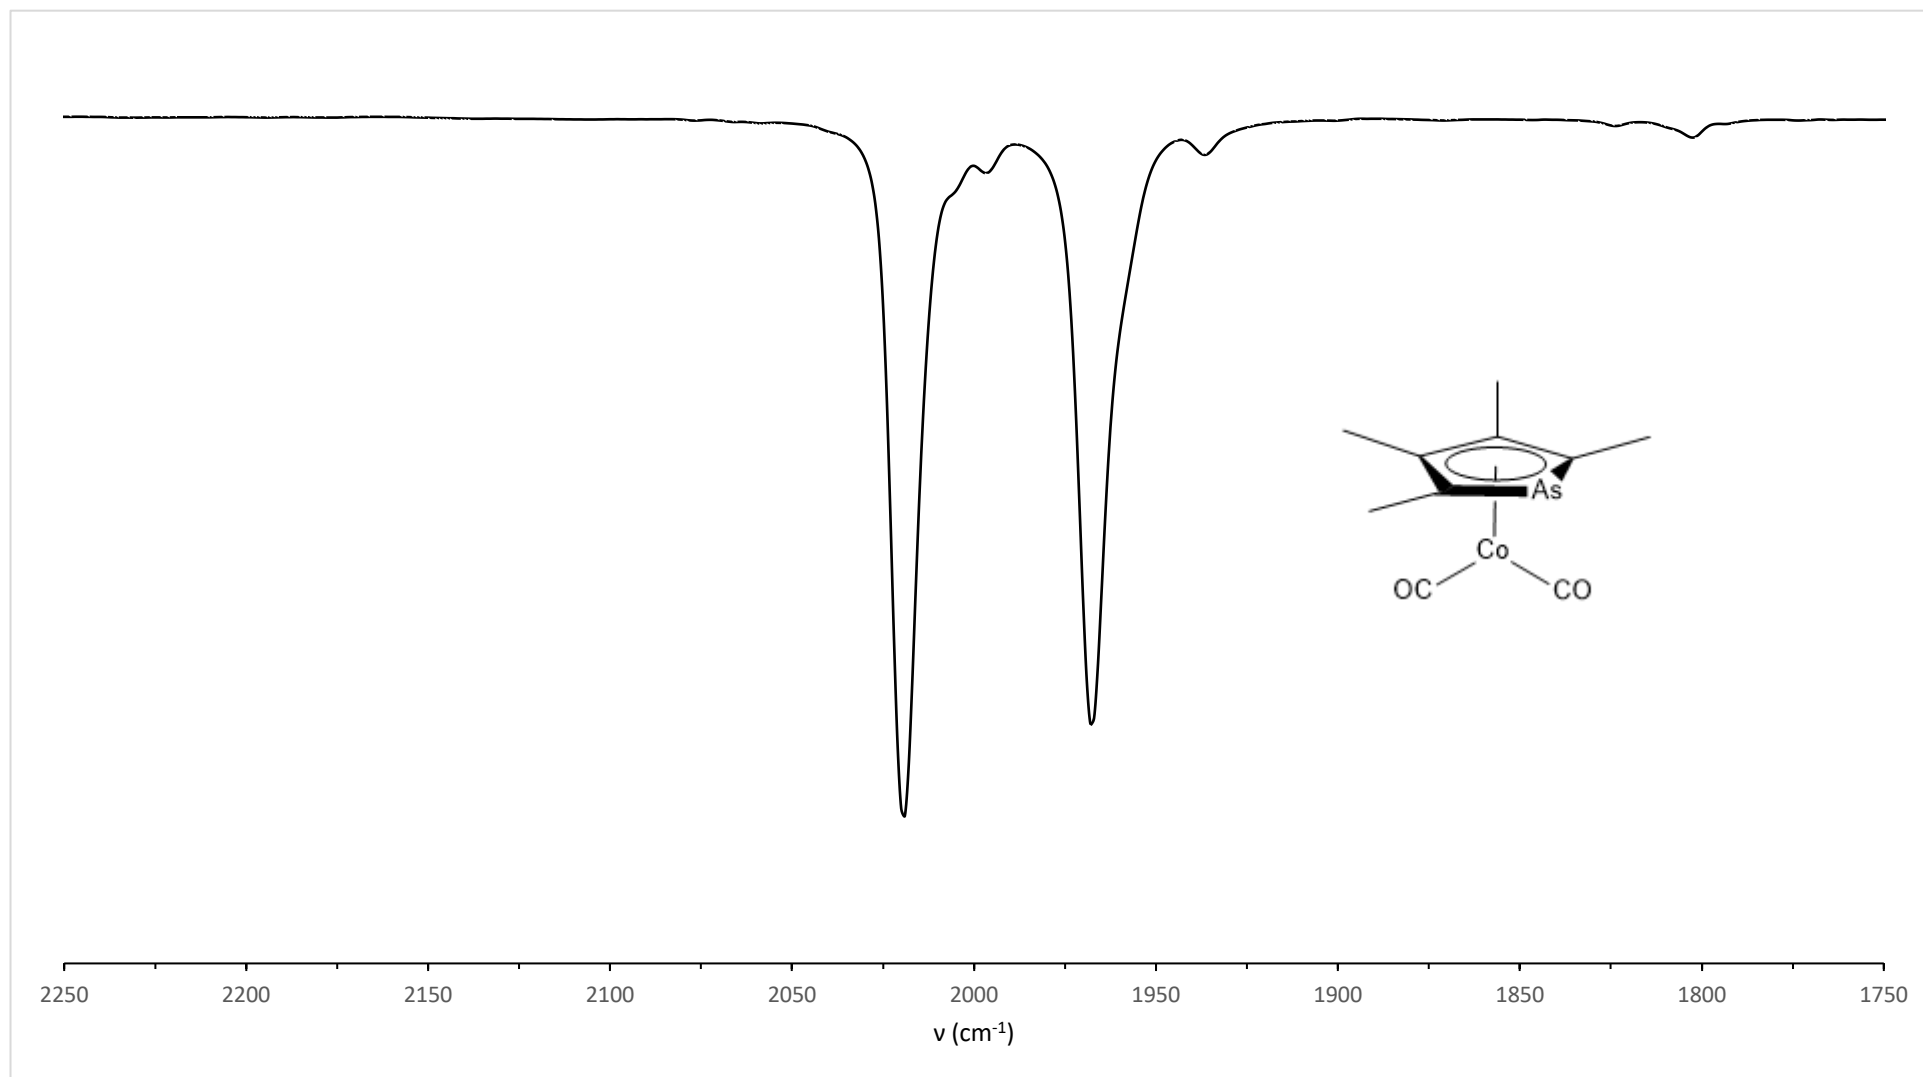

-ELECTRONIC SUPPORTING INFORMATION-

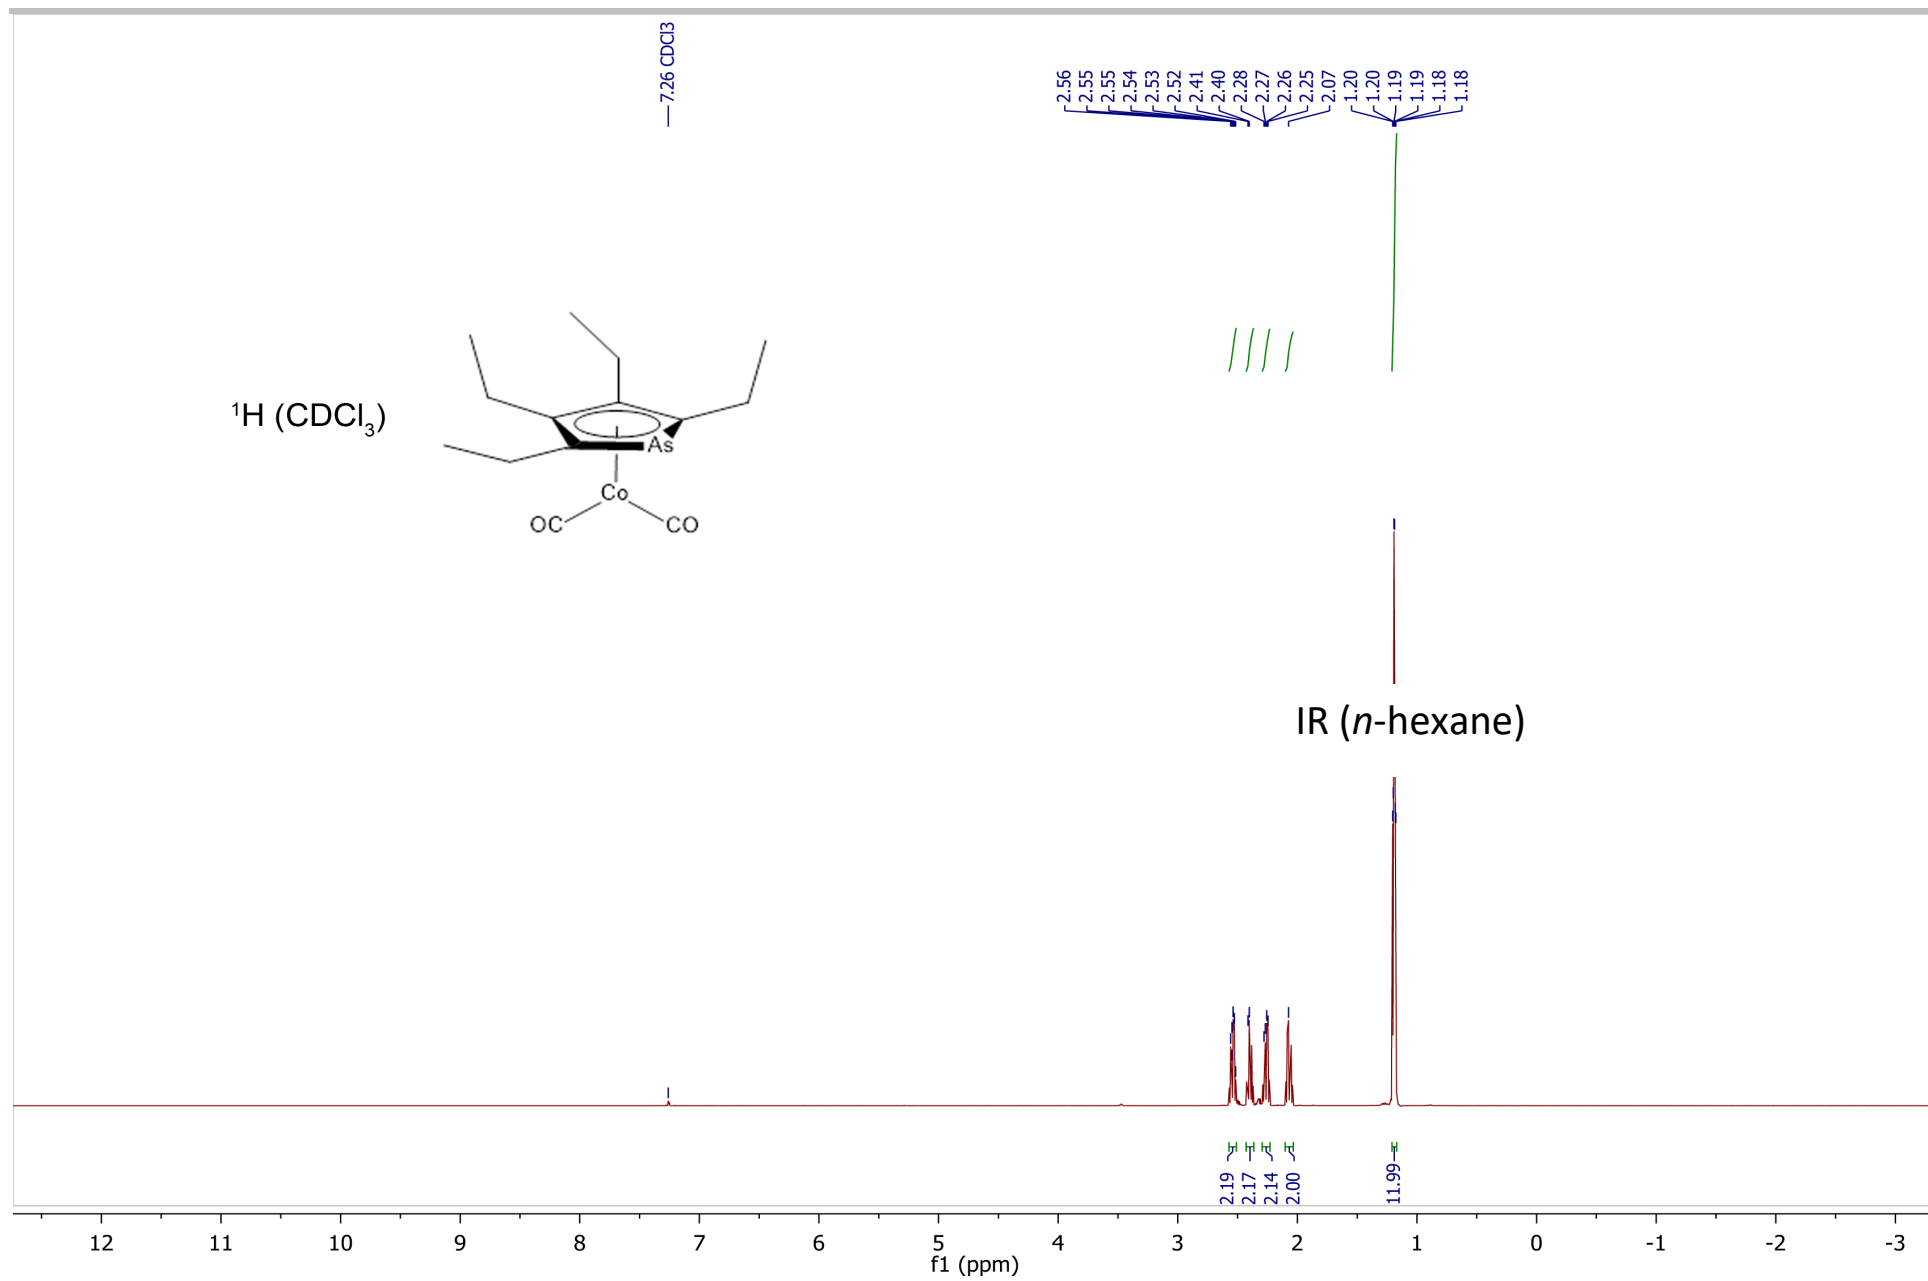

-ELECTRONIC SUPPORTING INFORMATION-

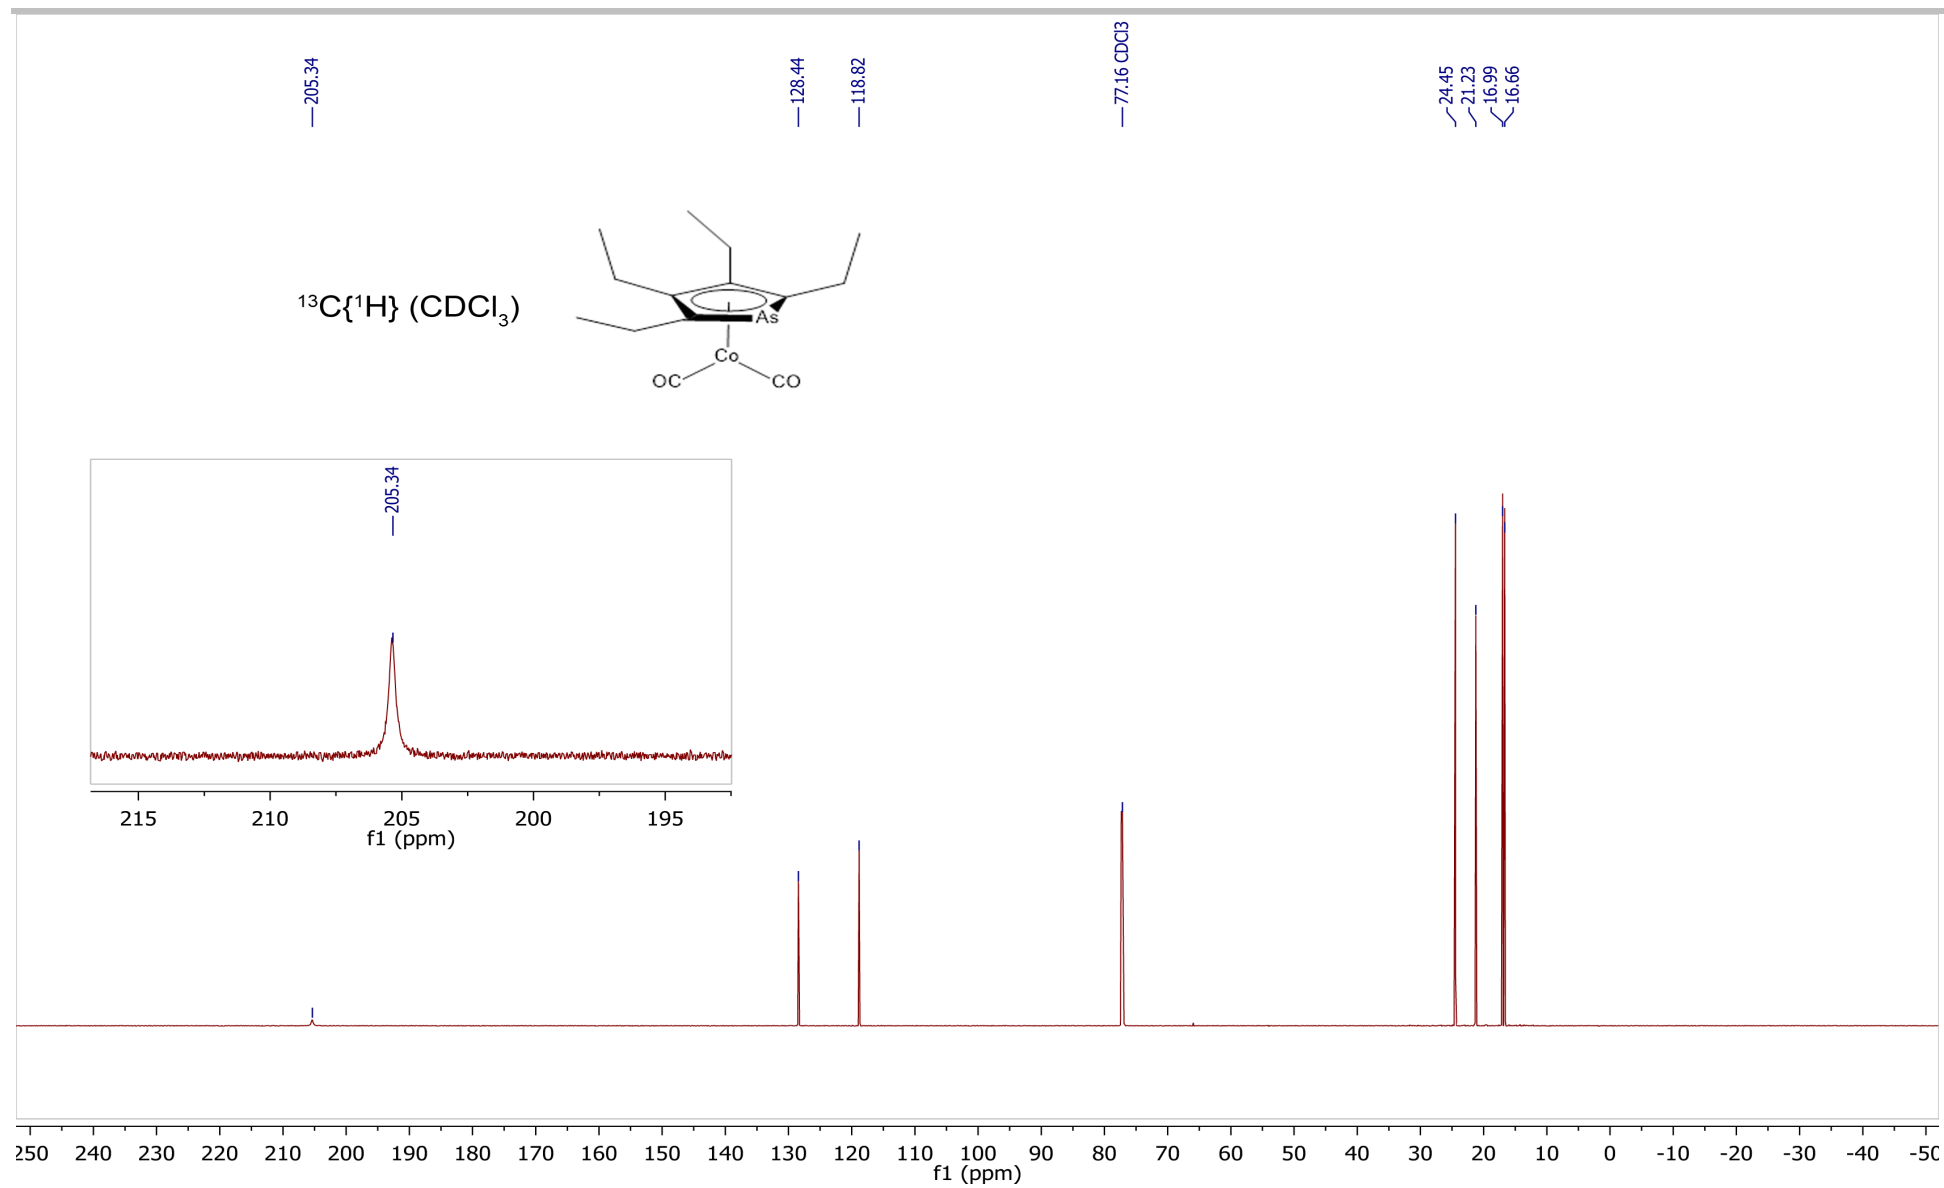



-ELECTRONIC SUPPORTING INFORMATION-

RMK-210-B-EI/AJ

Autospec Premier

03-May-2021

66645

15:17:01

HR0055AFAMMA (0.039) Is (1.00,1.00) C<sub>14</sub>H<sub>20</sub>AsCoO<sub>2</sub>

Magnet EI+  
8.50e12

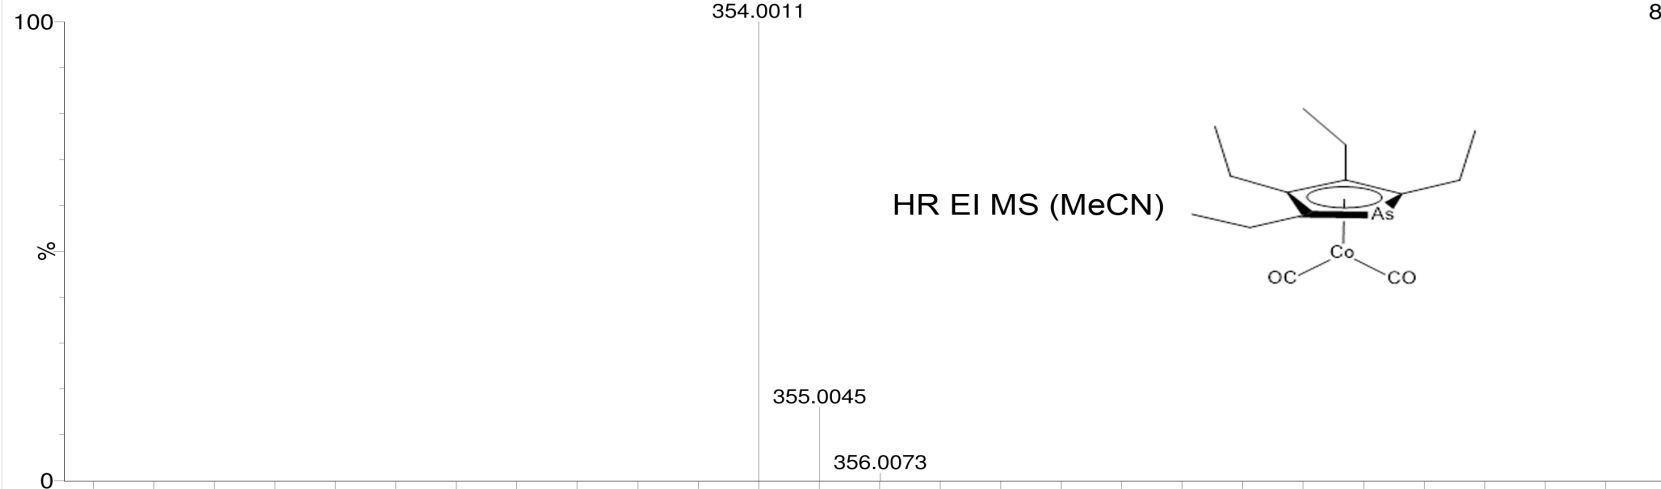

HR0055AFAMMA 56 (2.211)

Magnet EI+  
369.0105 225

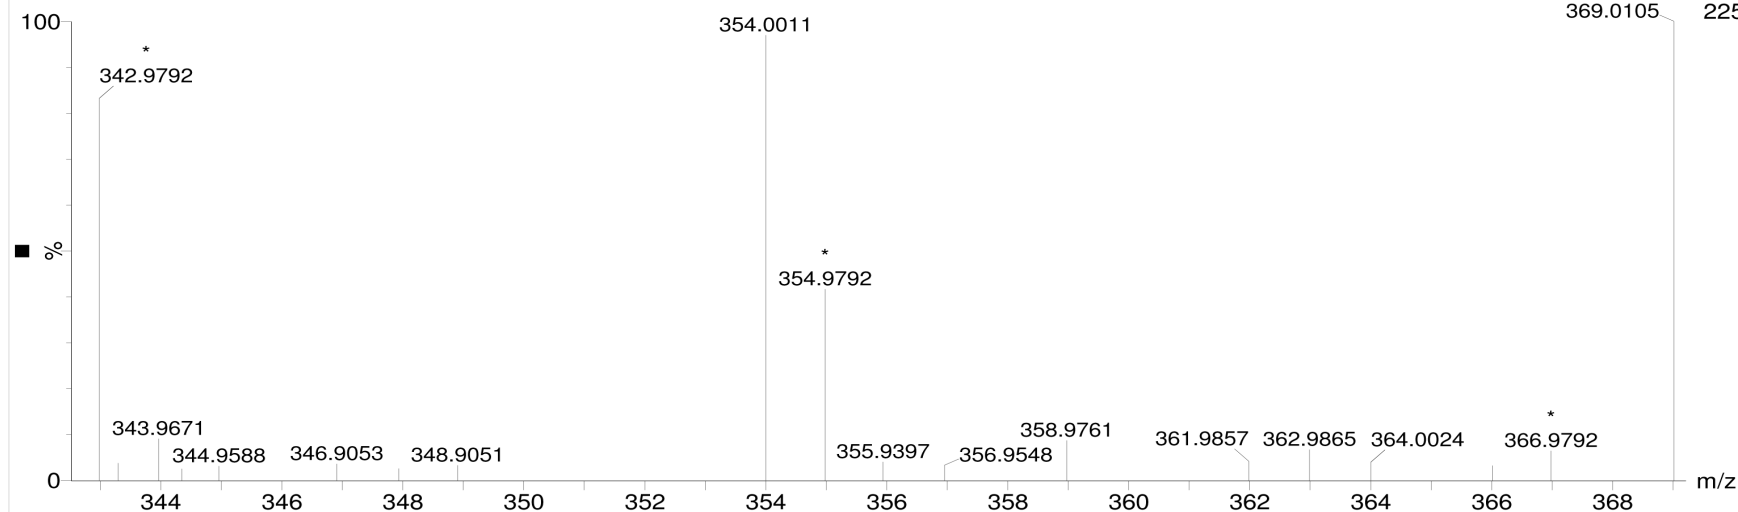

-ELECTRONIC SUPPORTING INFORMATION-

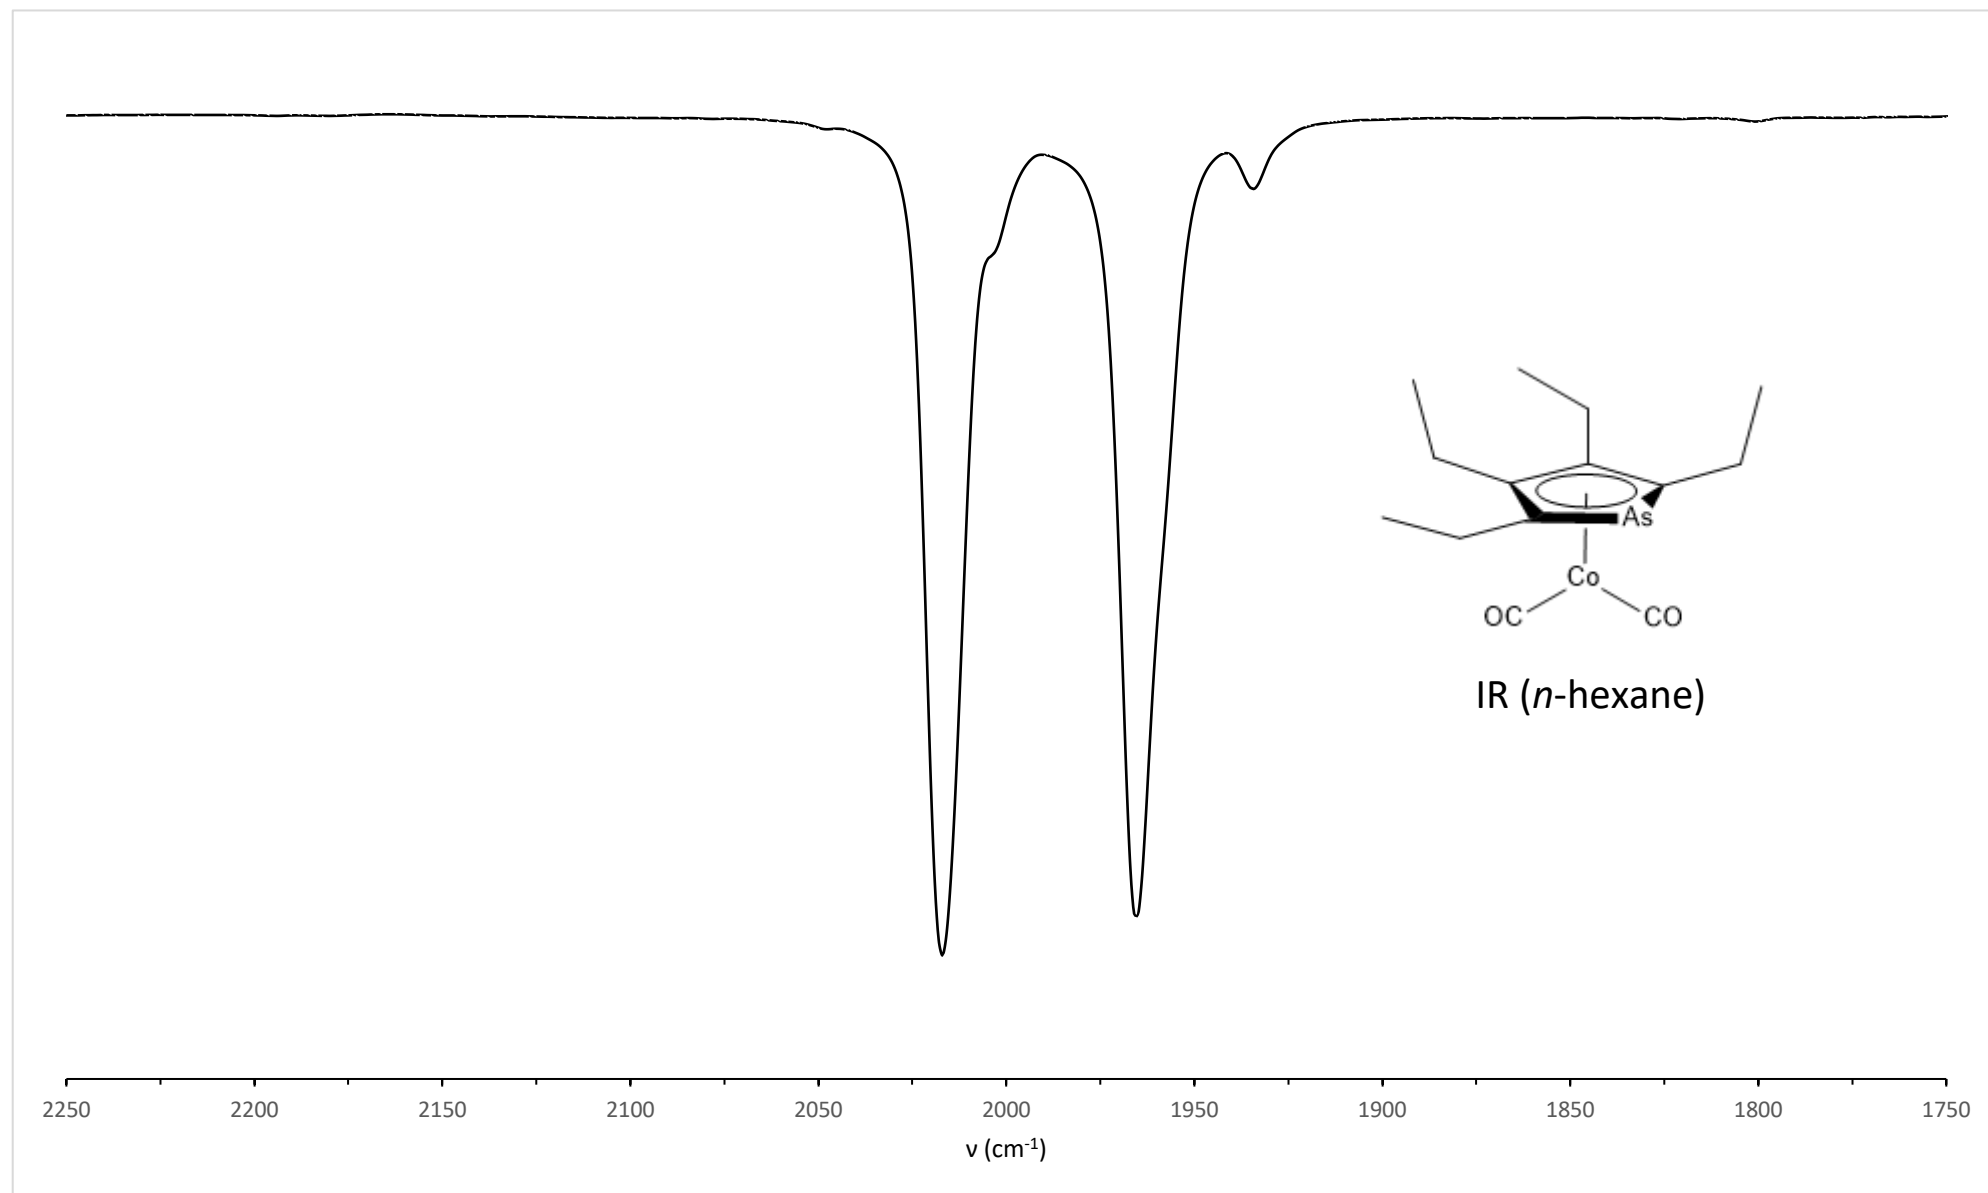

-ELECTRONIC SUPPORTING INFORMATION-

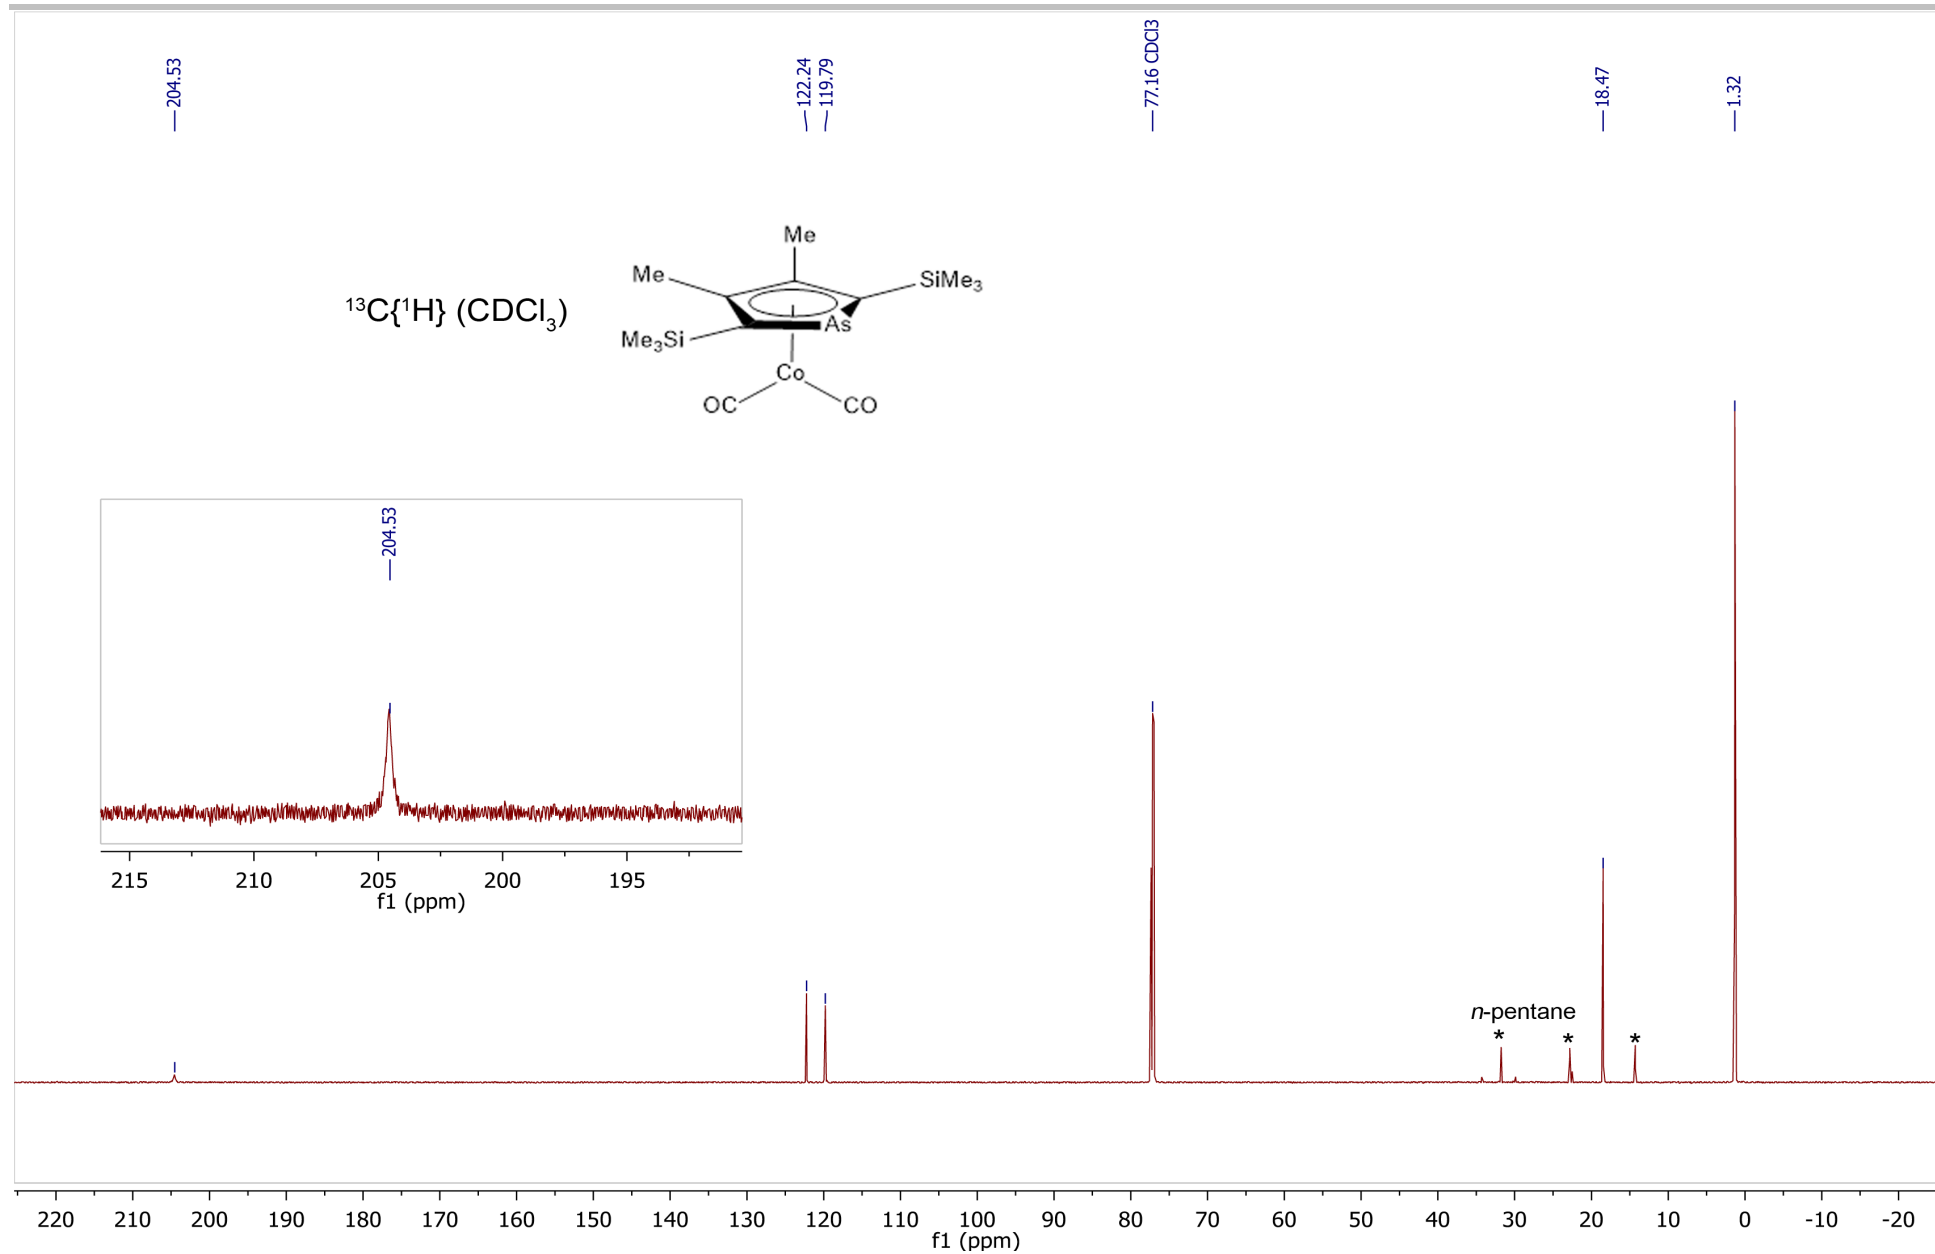

-ELECTRONIC SUPPORTING INFORMATION-

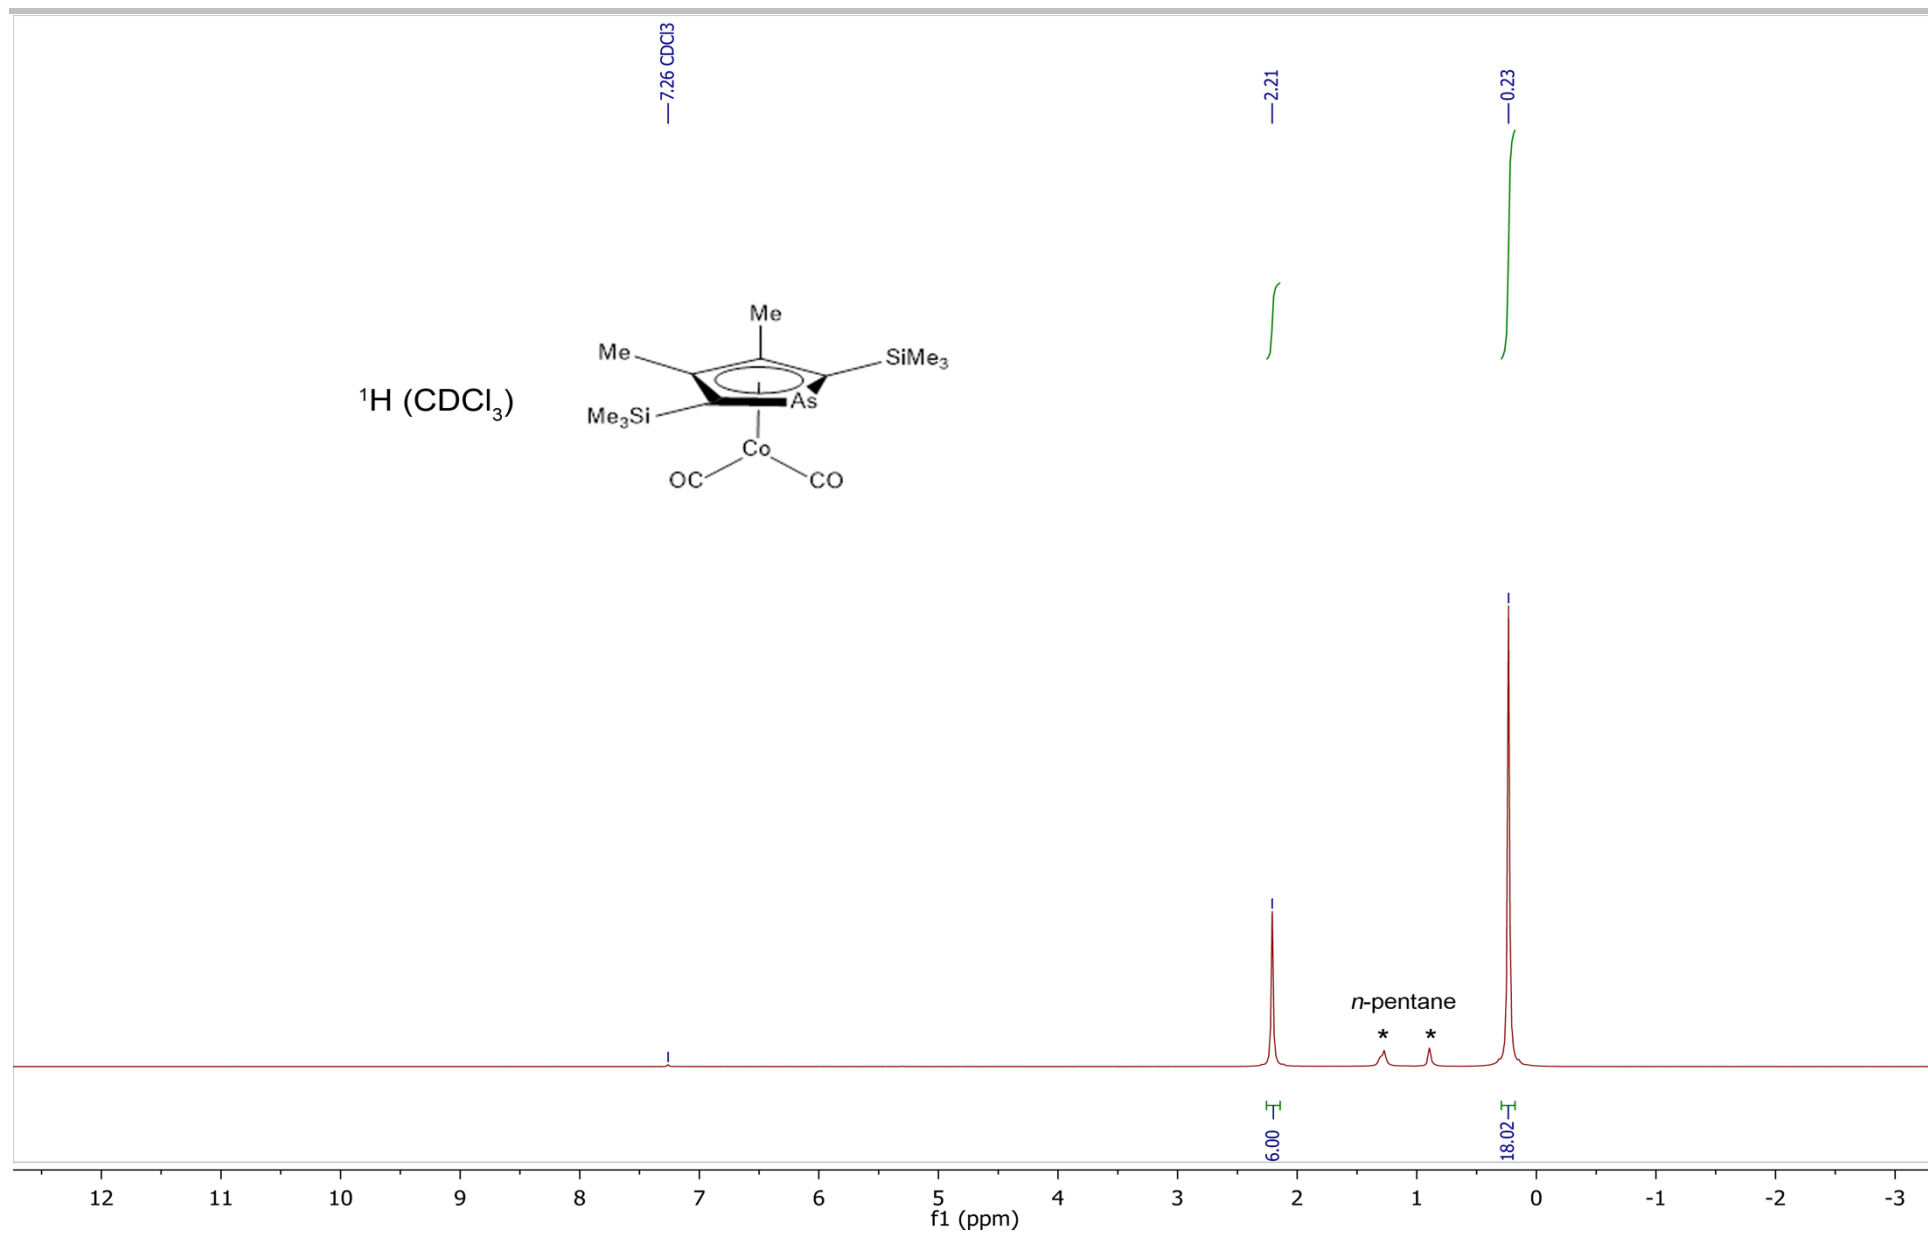

-ELECTRONIC SUPPORTING INFORMATION-

RMK-217-EI/AJ  
66717

Autospec Premier

07-Jun-2021

15:41:41

HR0063 (0.039) Is (1.00,1.00) C<sub>14</sub>H<sub>24</sub>AsCoO<sub>2</sub>Si<sub>2</sub>

Magnet EI+  
7.23e12

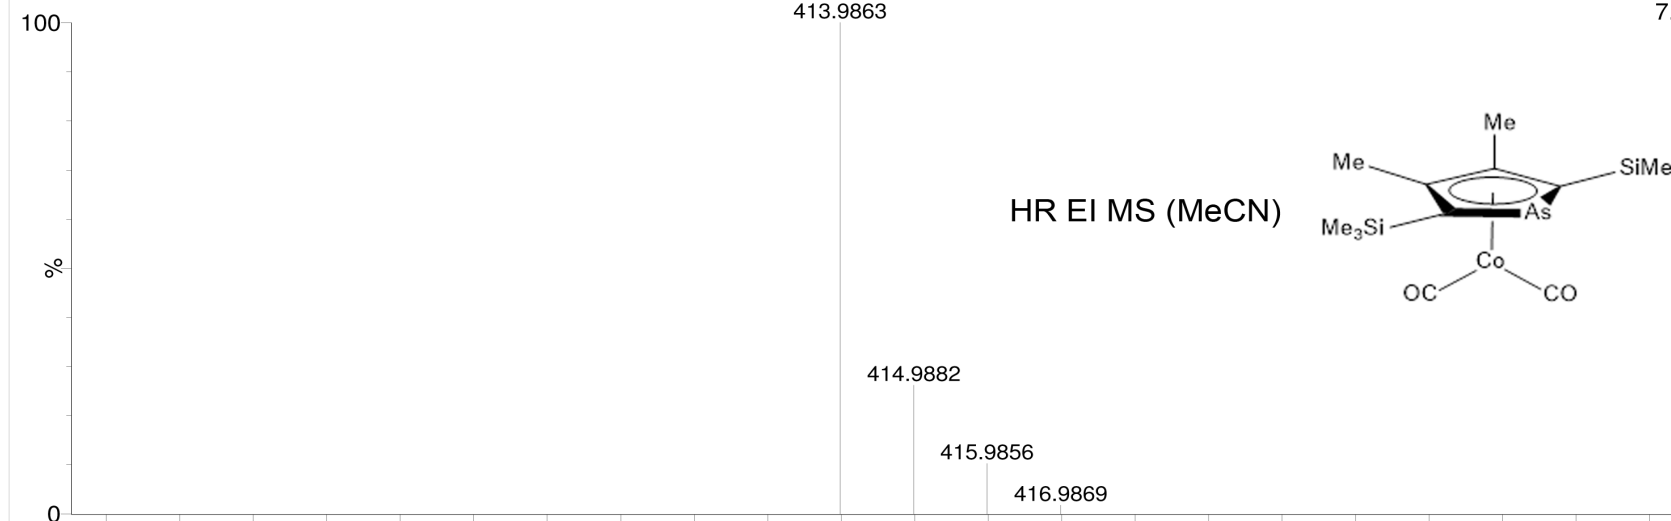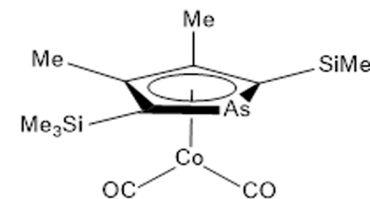

HR0063AFAMM 49 (1.934)

Magnet EI+  
6.97e4

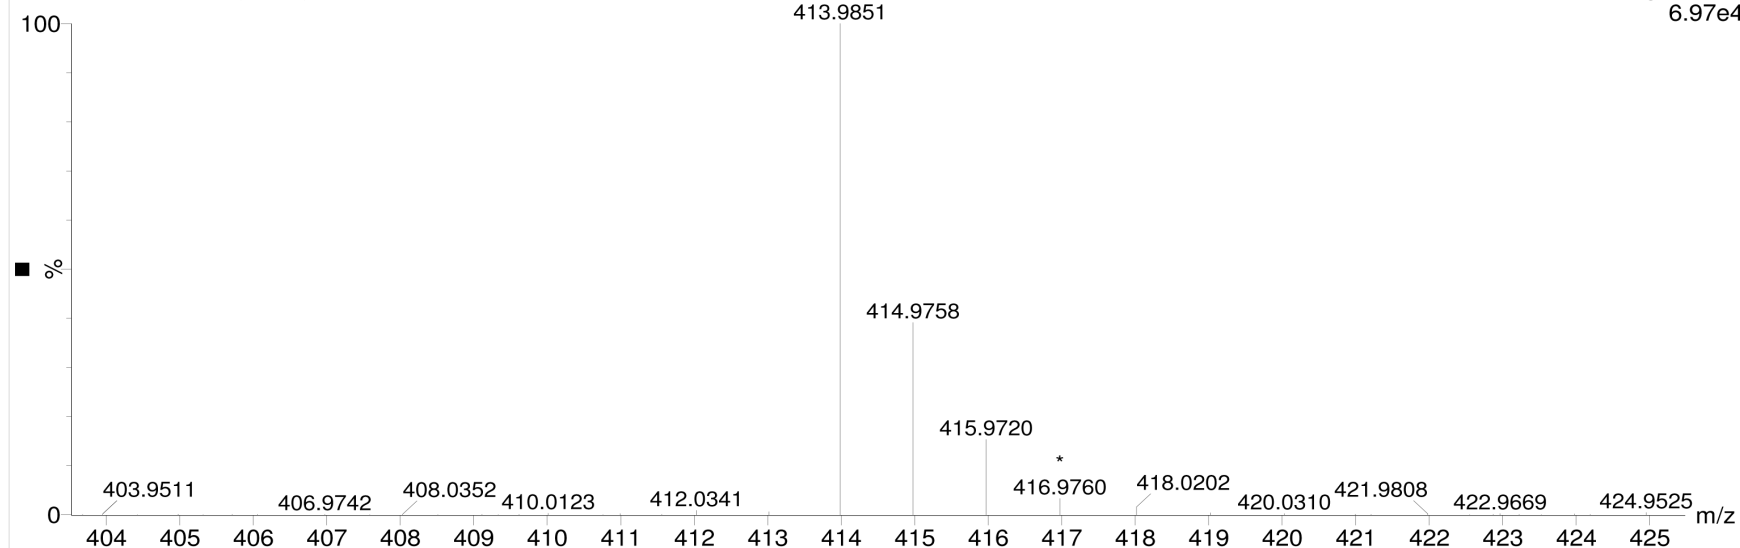

-ELECTRONIC SUPPORTING INFORMATION-

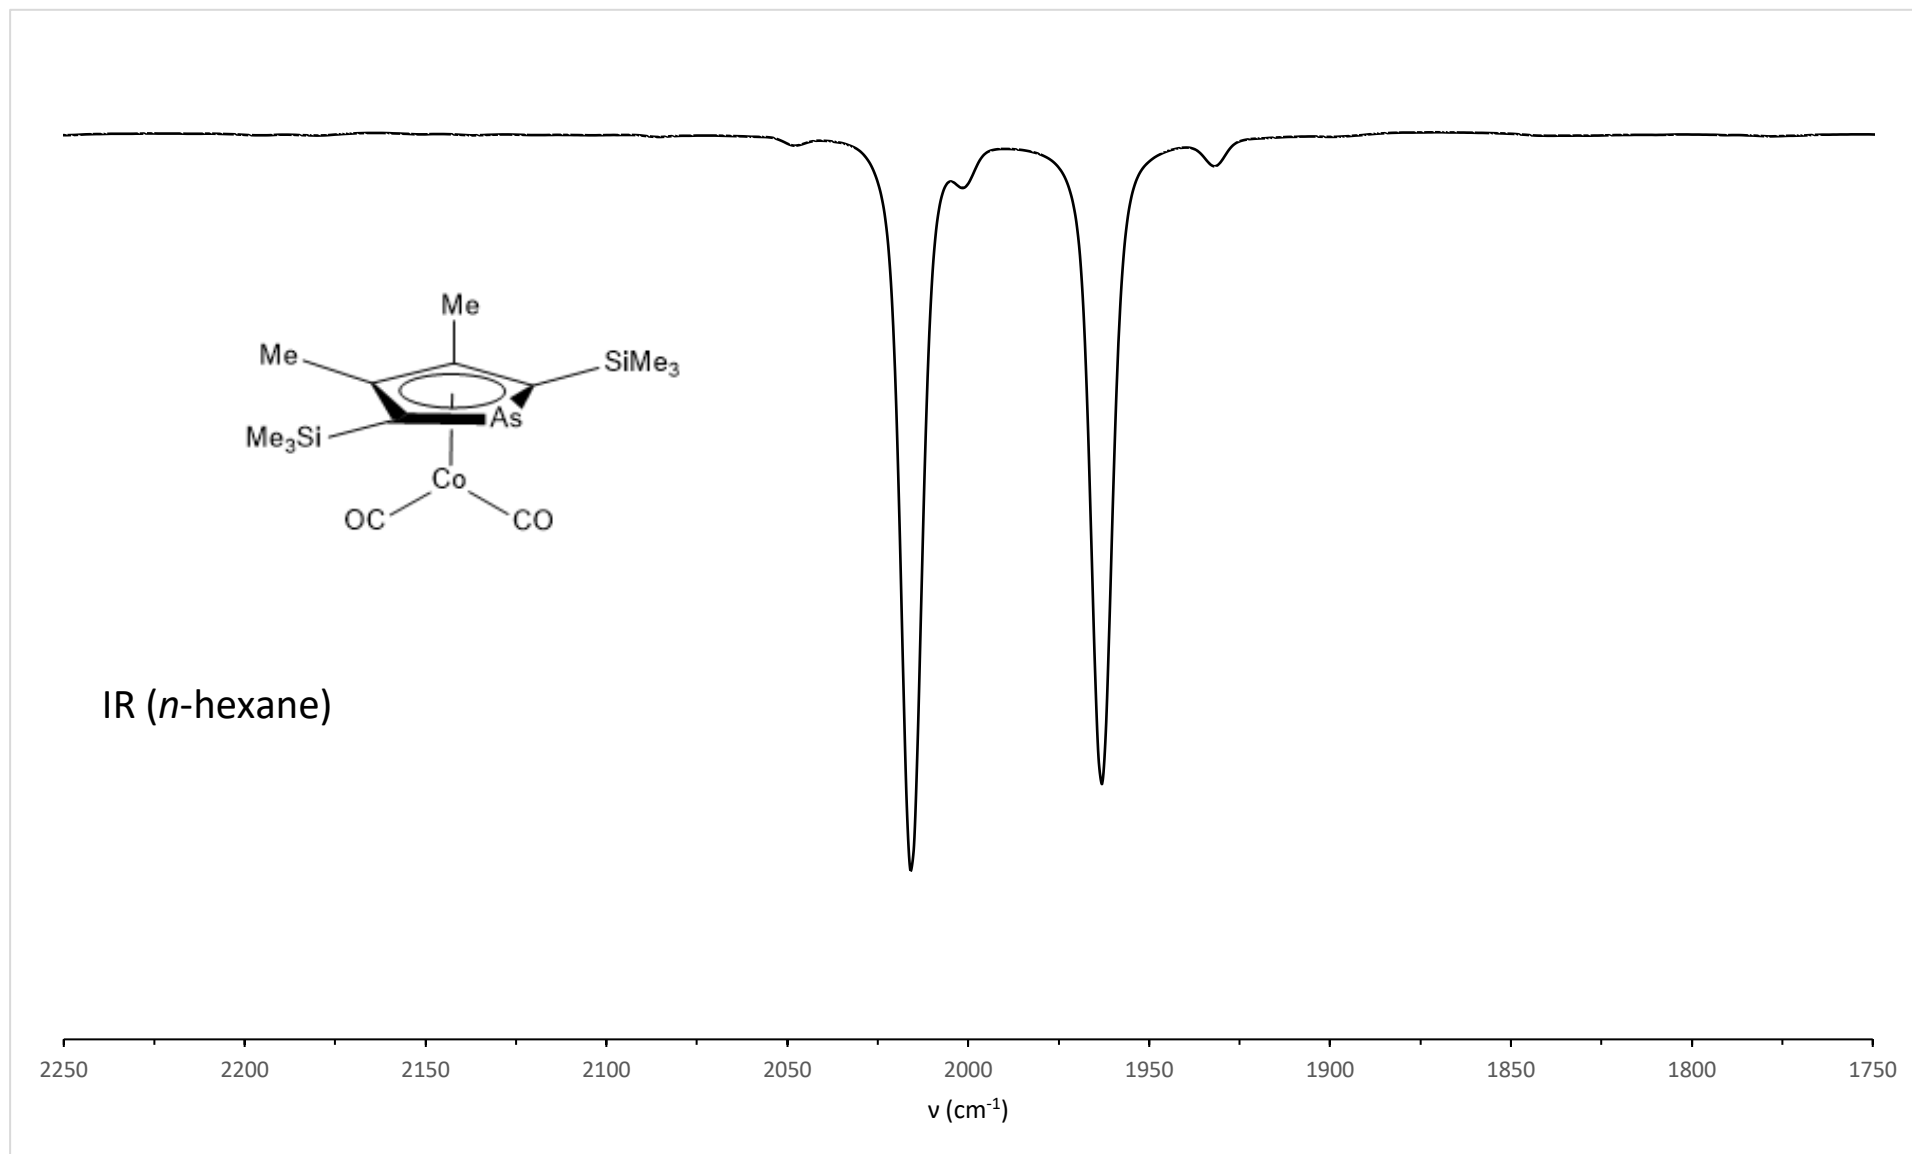

-ELECTRONIC SUPPORTING INFORMATION-

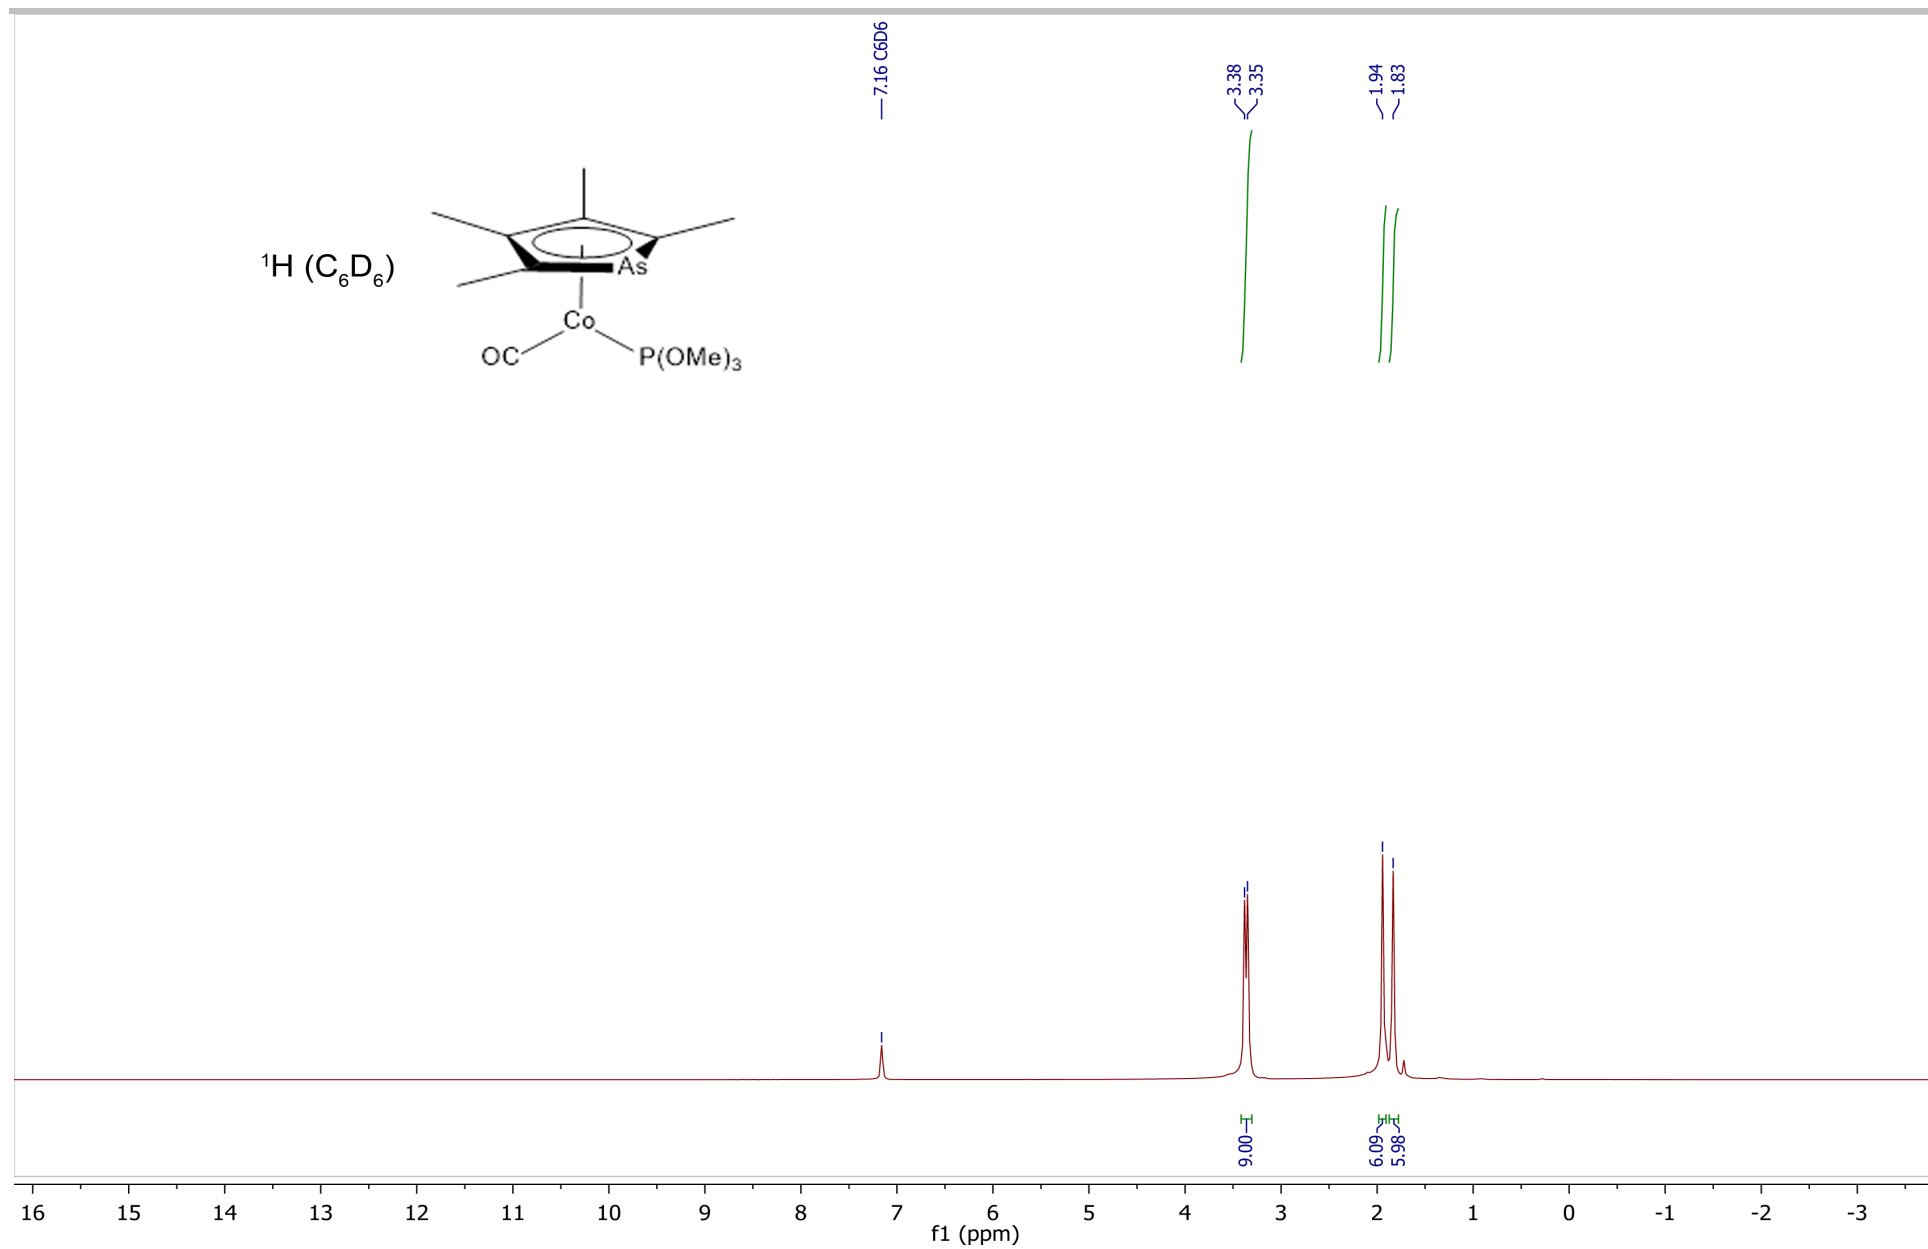



-ELECTRONIC SUPPORTING INFORMATION-

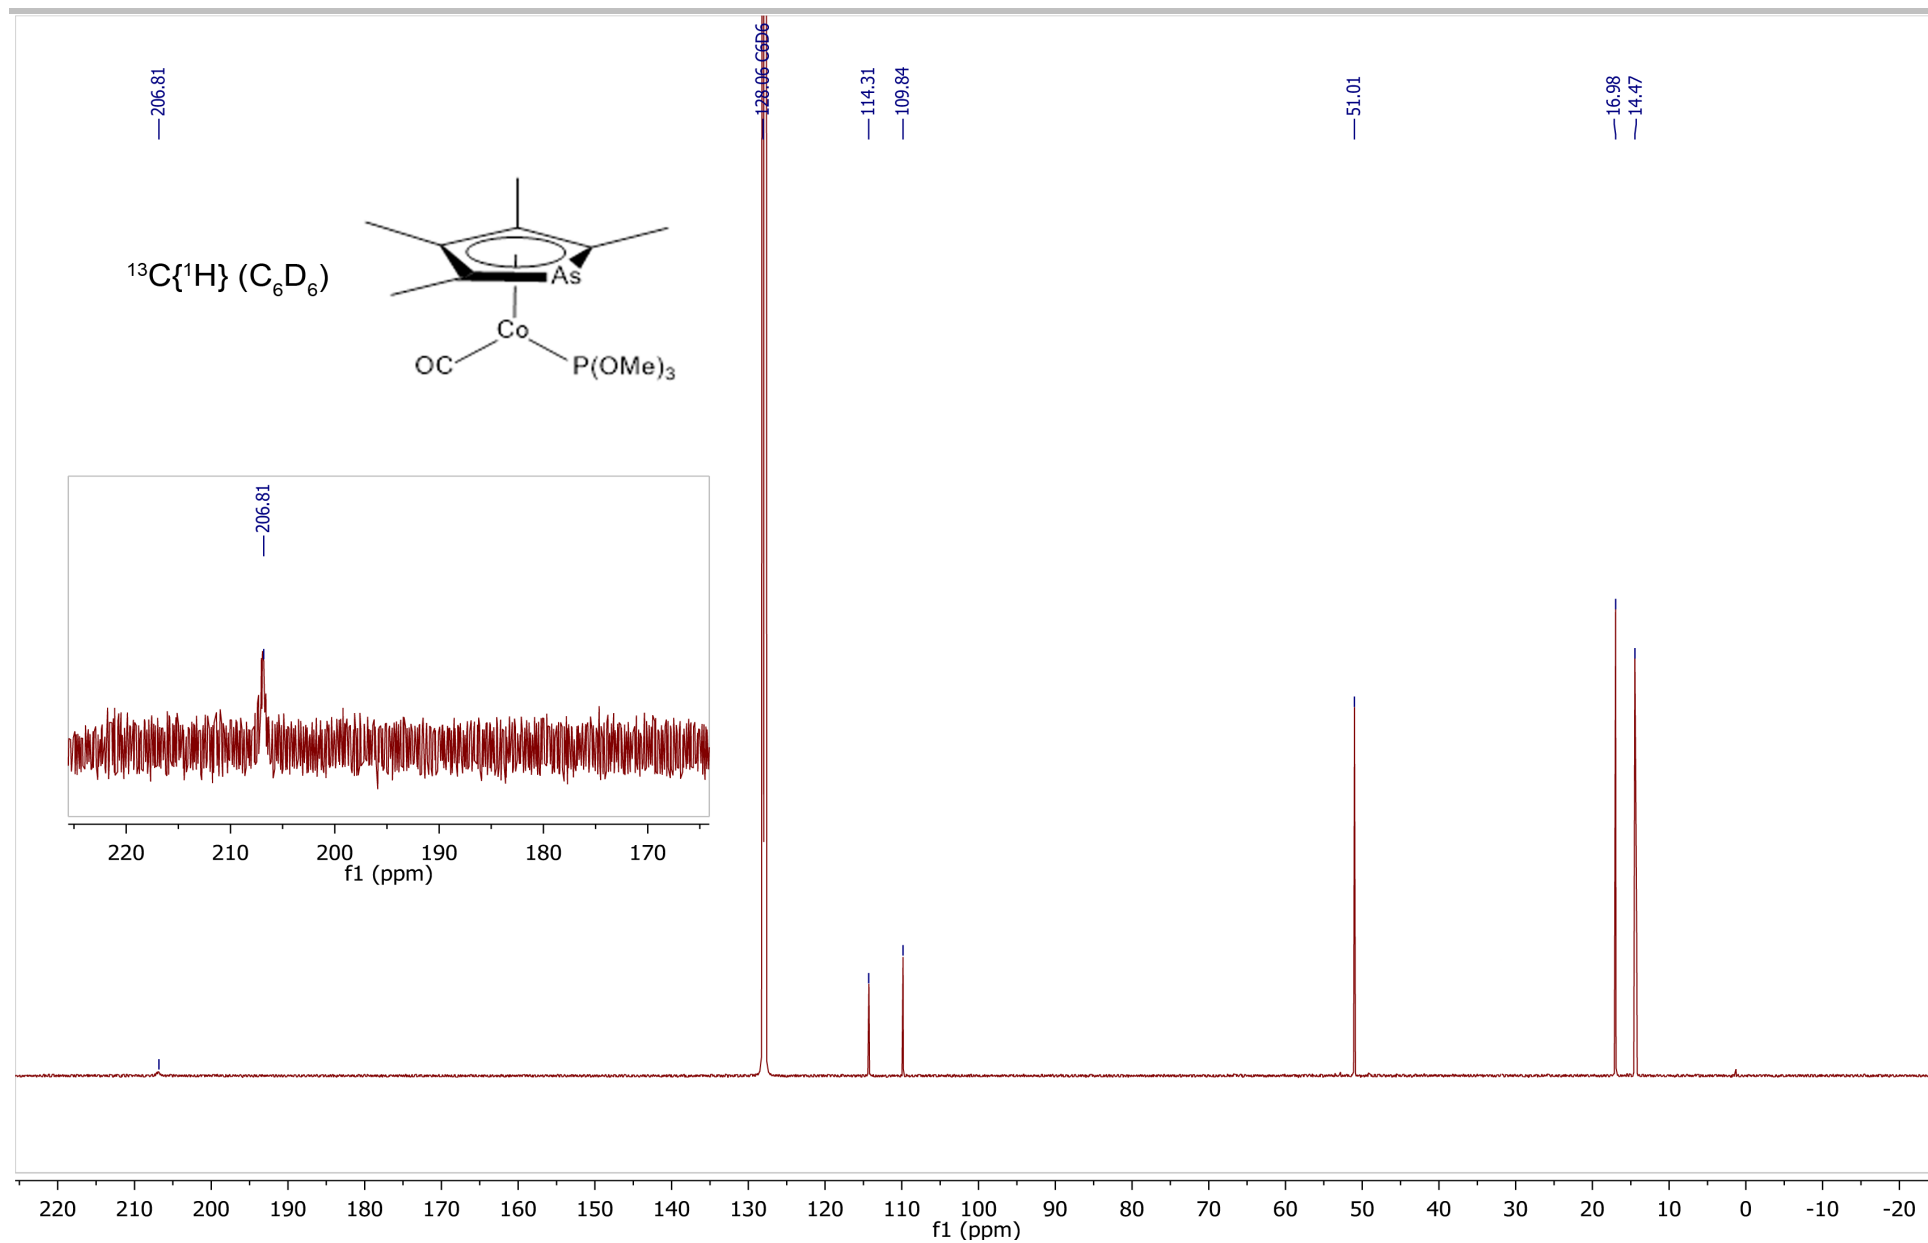

-ELECTRONIC SUPPORTING INFORMATION-

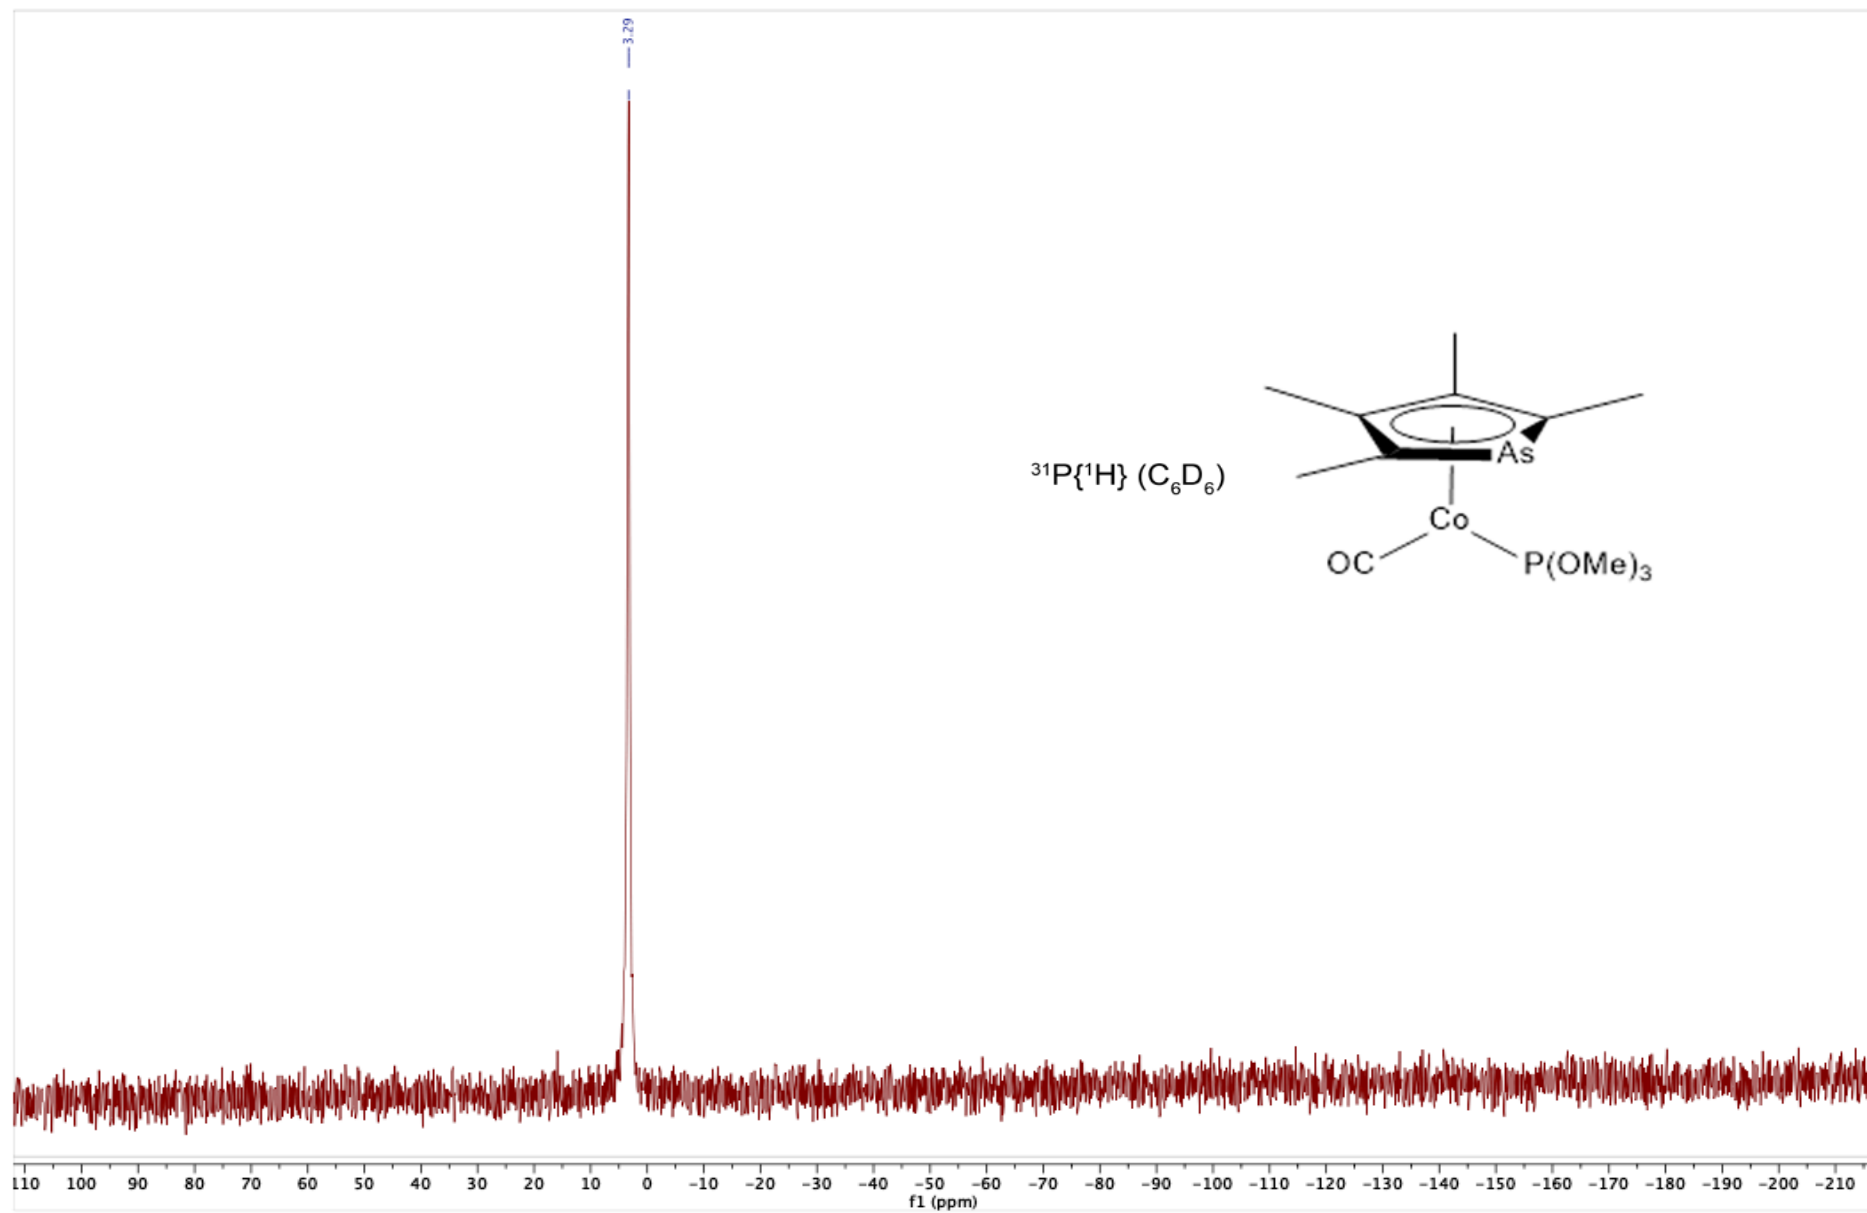

-ELECTRONIC SUPPORTING INFORMATION-

RMK-213-A-EI/AJ  
66714

Autospec Premier

07-Jun-2021

15:27:32

HR0062AFAMMA (0.039) Is (1.00,1.00) C<sub>12</sub>H<sub>21</sub>AsCoO<sub>4</sub>P

Magnet EI+  
8.65e12

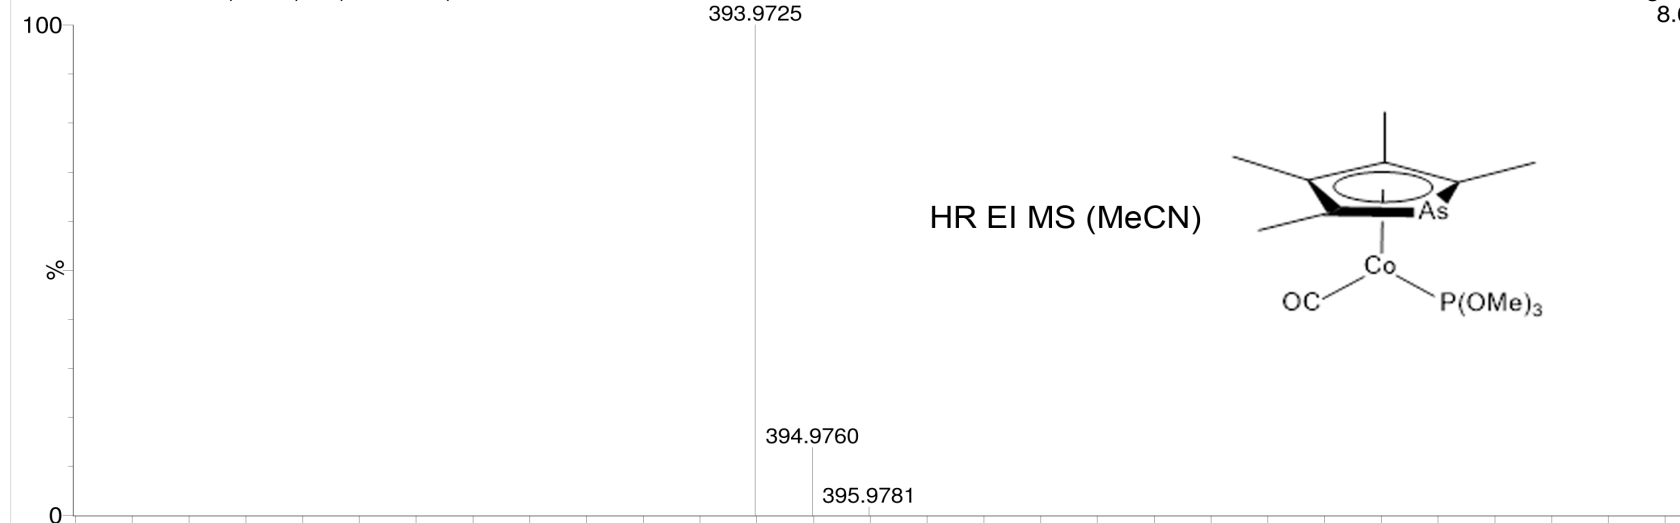

HR0062AFAMMA 24 (0.947) Cm (21:24)

Magnet EI+  
4.83e4

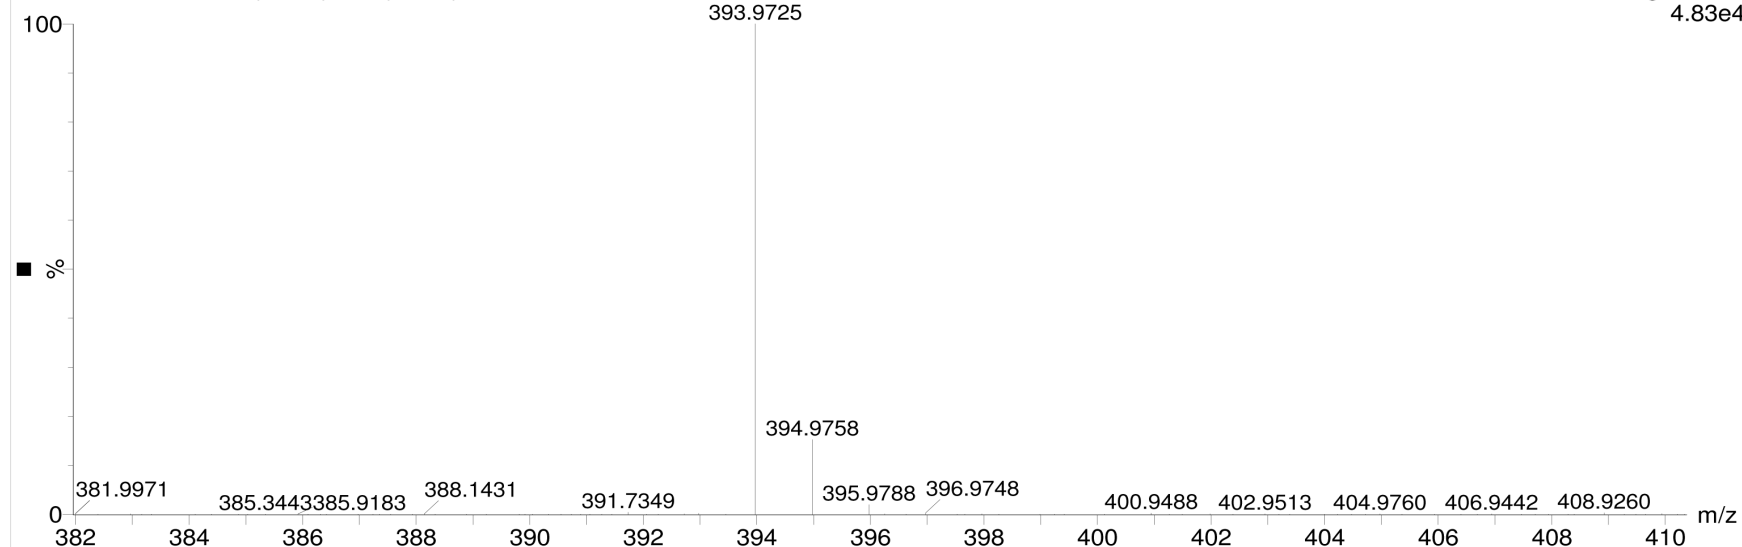

-ELECTRONIC SUPPORTING INFORMATION-

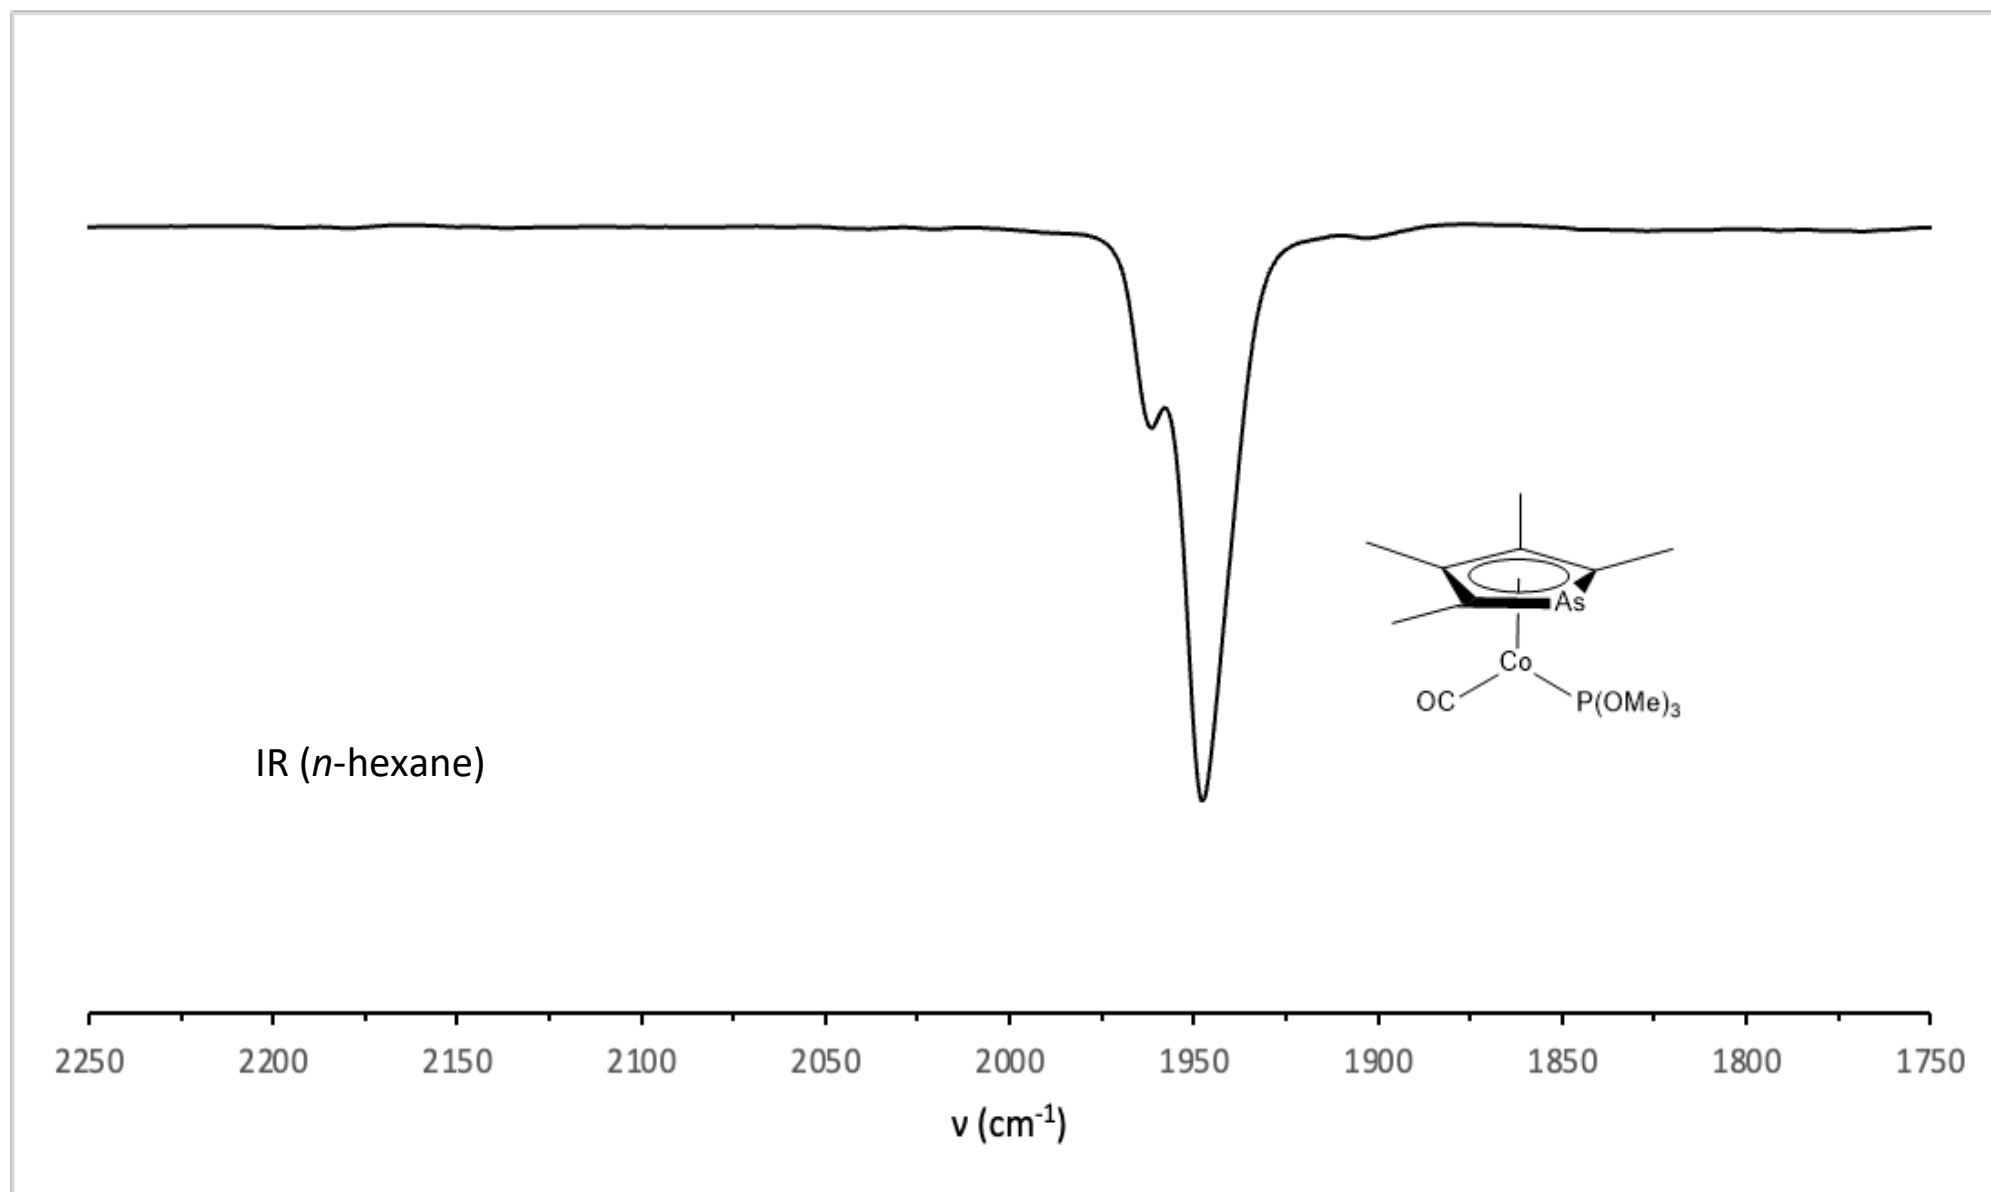

-ELECTRONIC SUPPORTING INFORMATION-

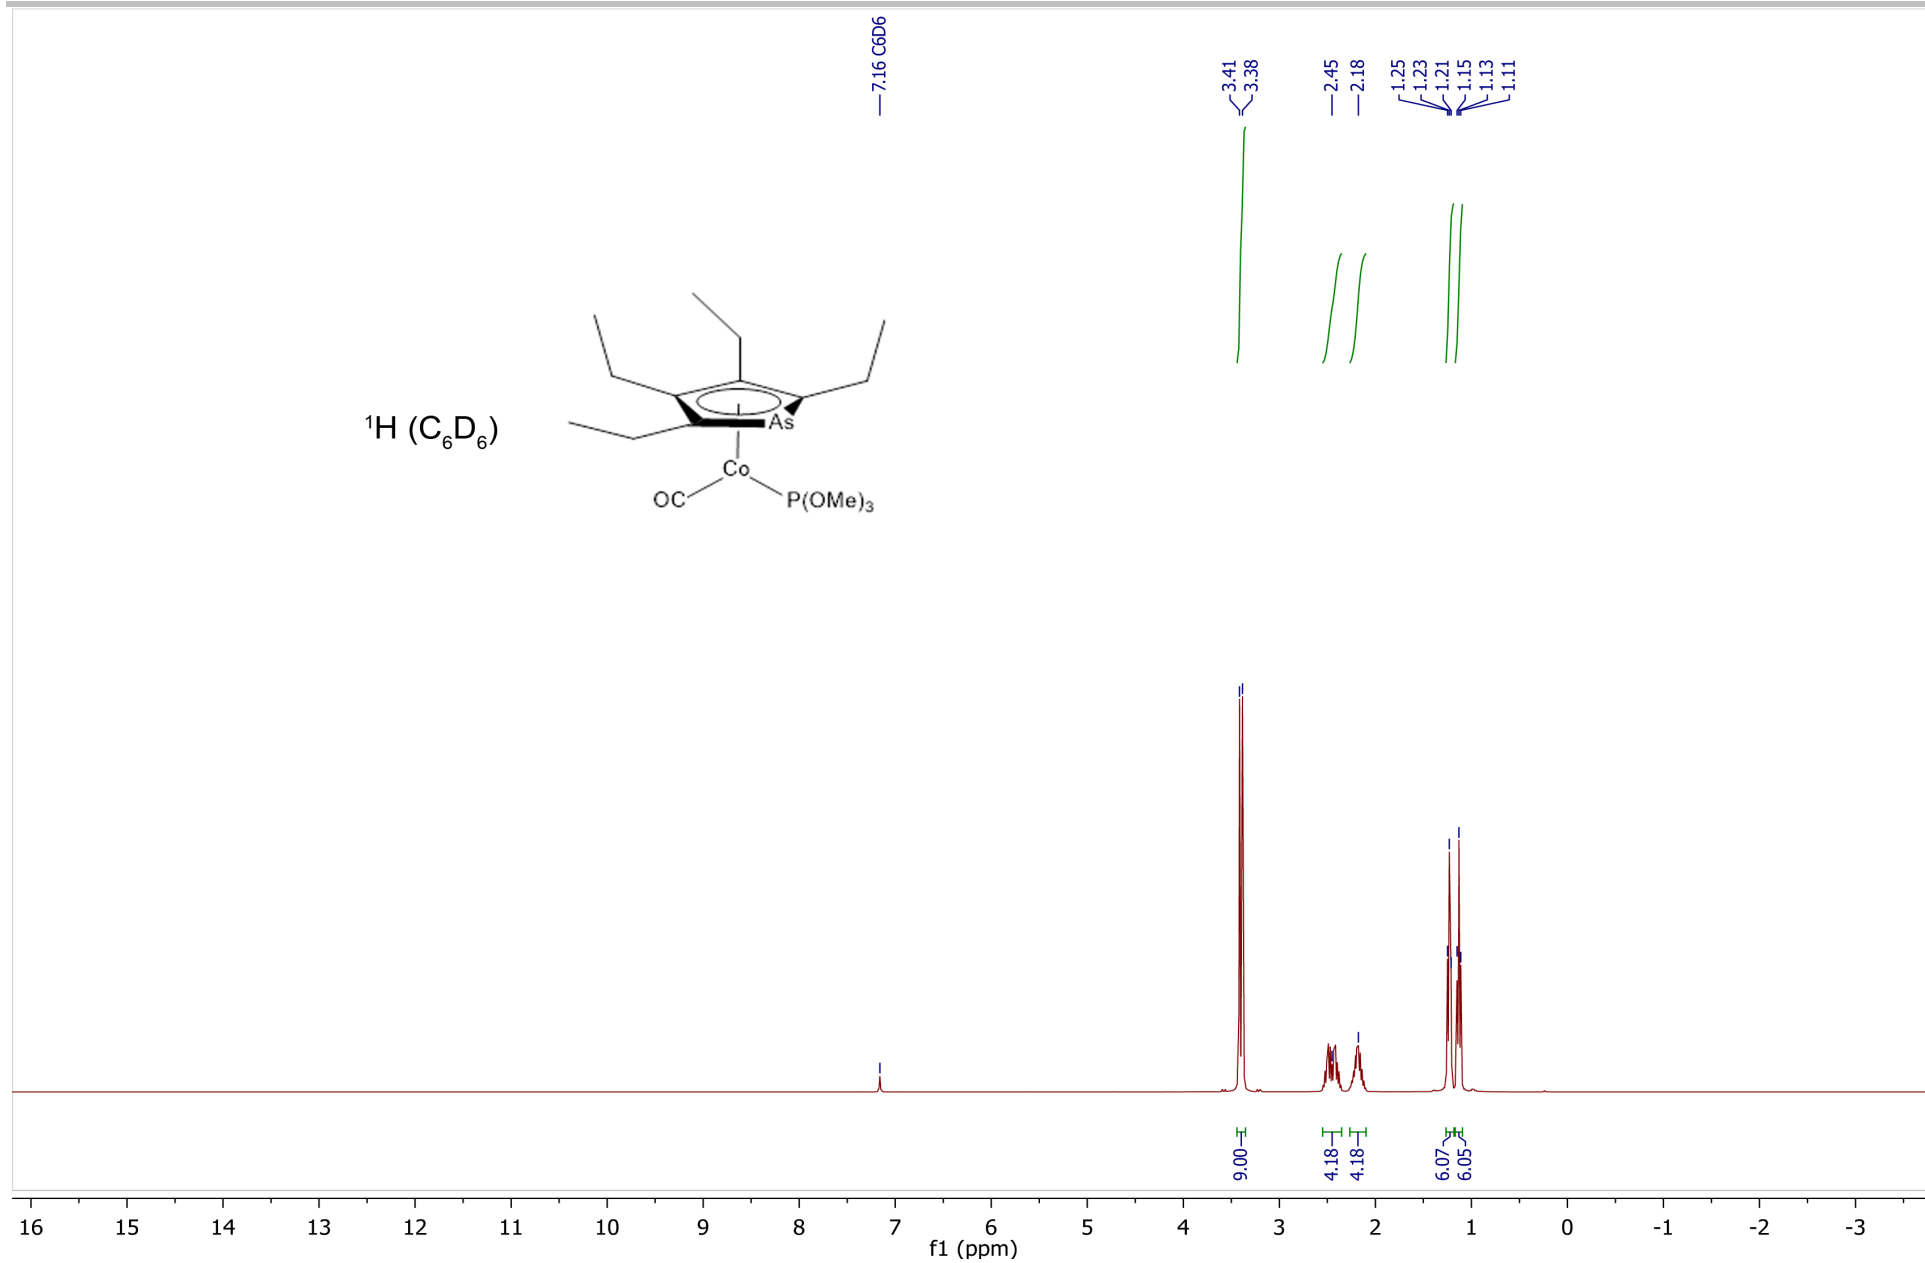

-ELECTRONIC SUPPORTING INFORMATION-

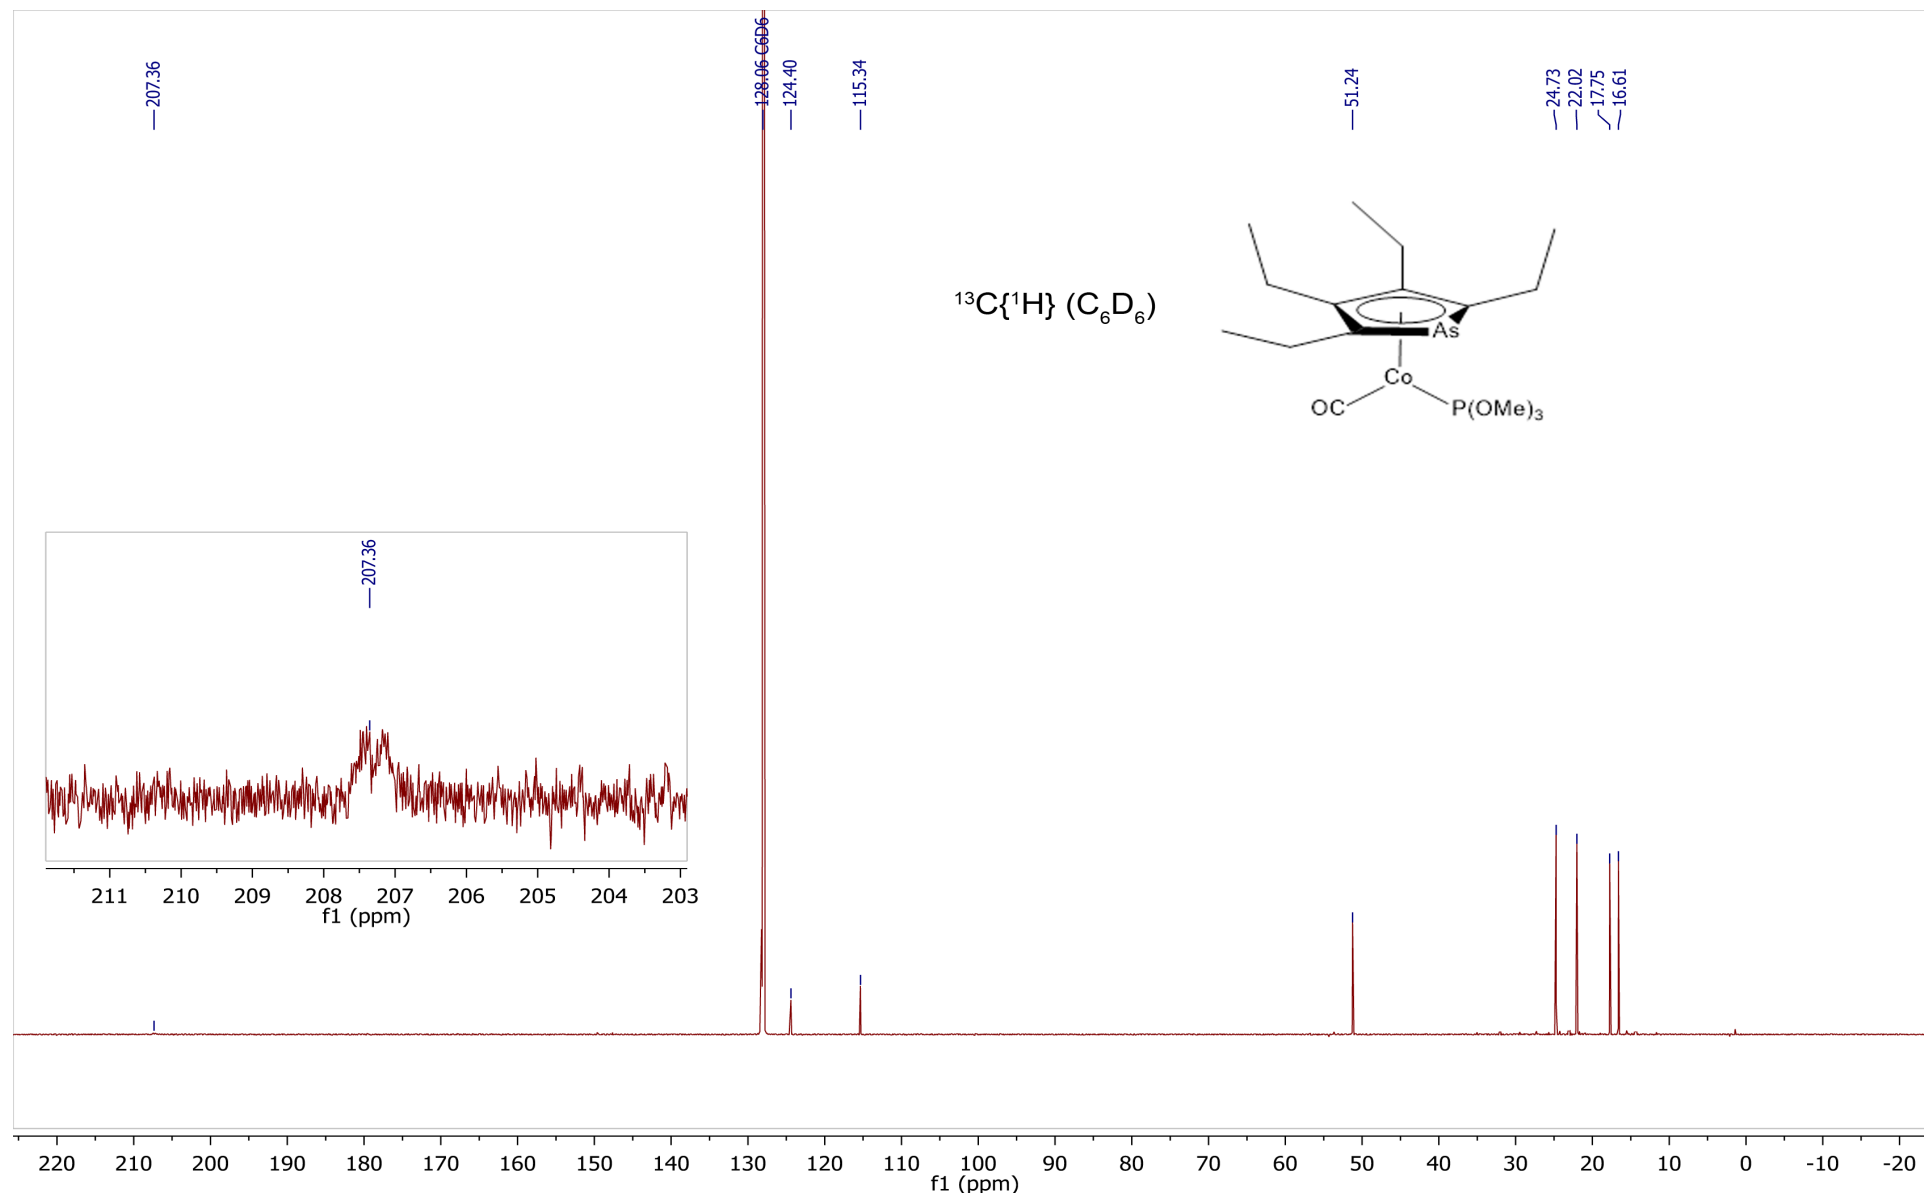

-ELECTRONIC SUPPORTING INFORMATION-

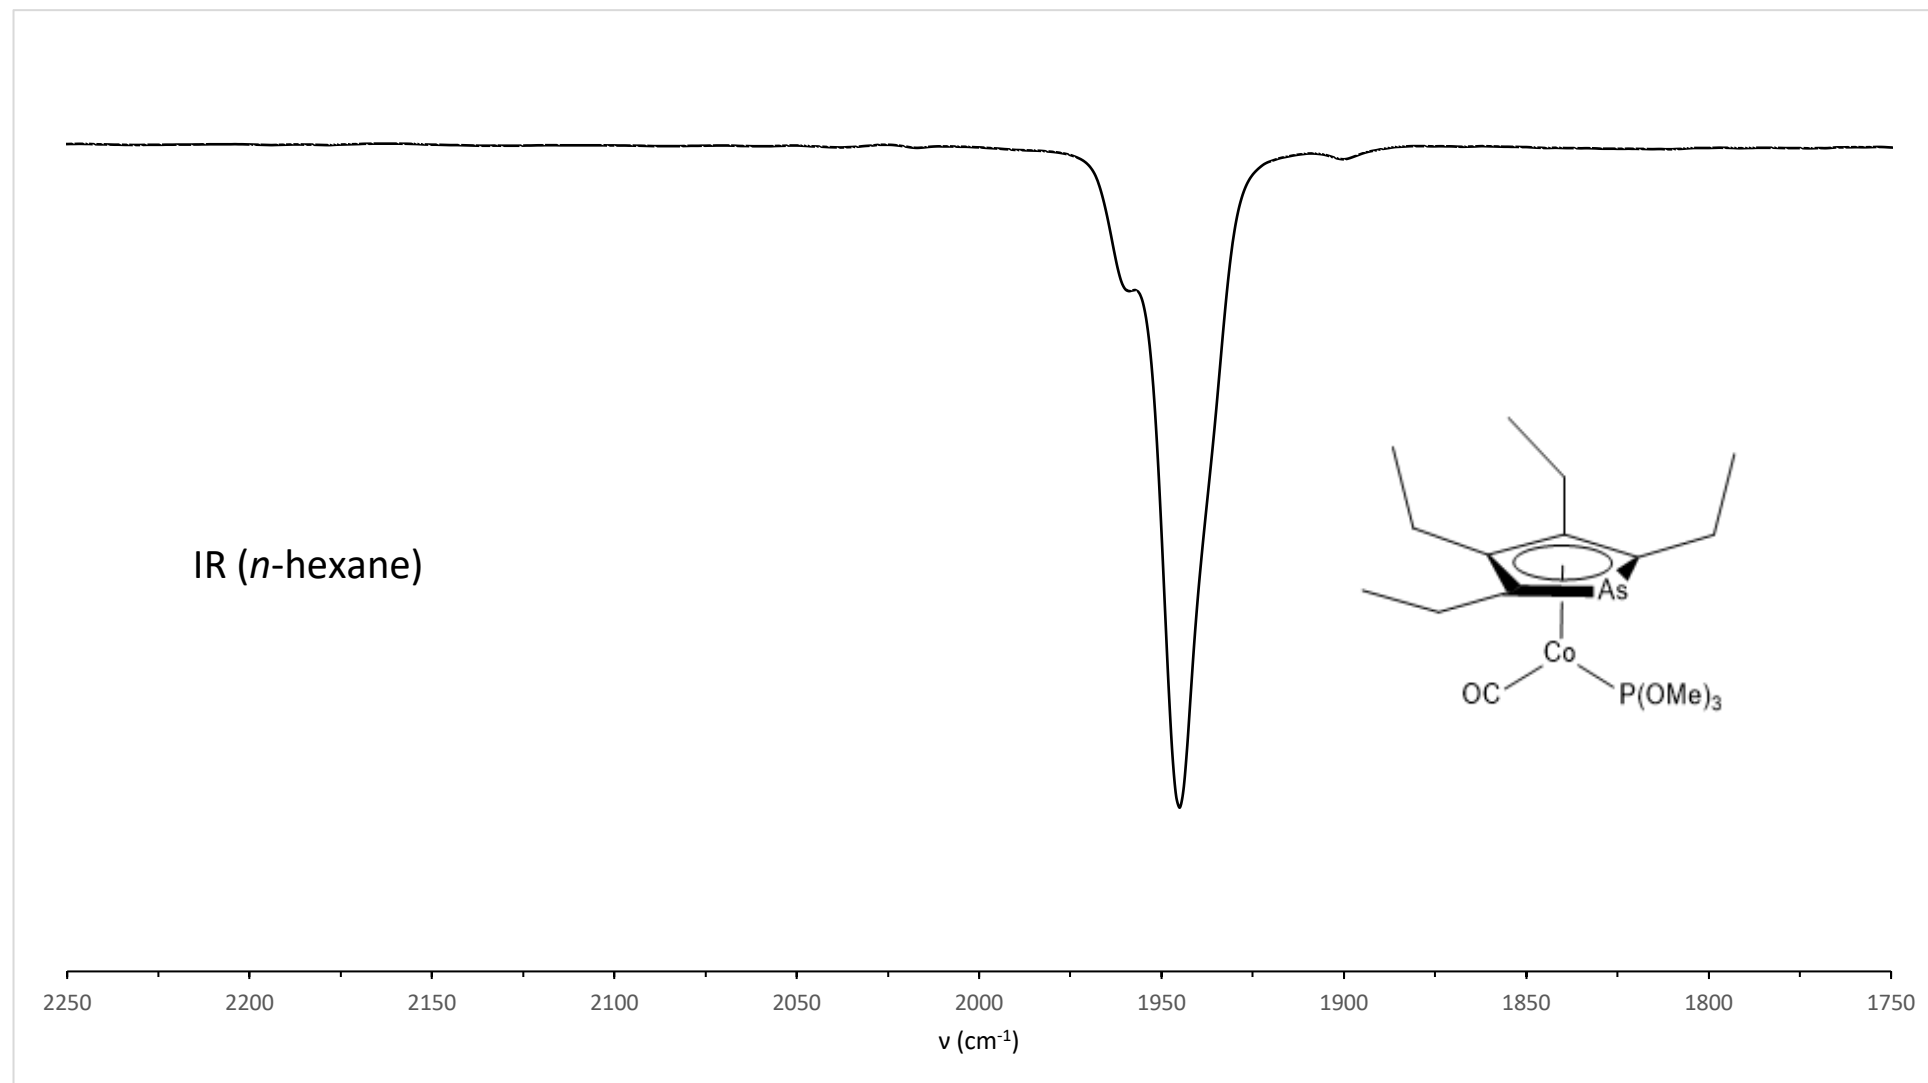

-ELECTRONIC SUPPORTING INFORMATION-

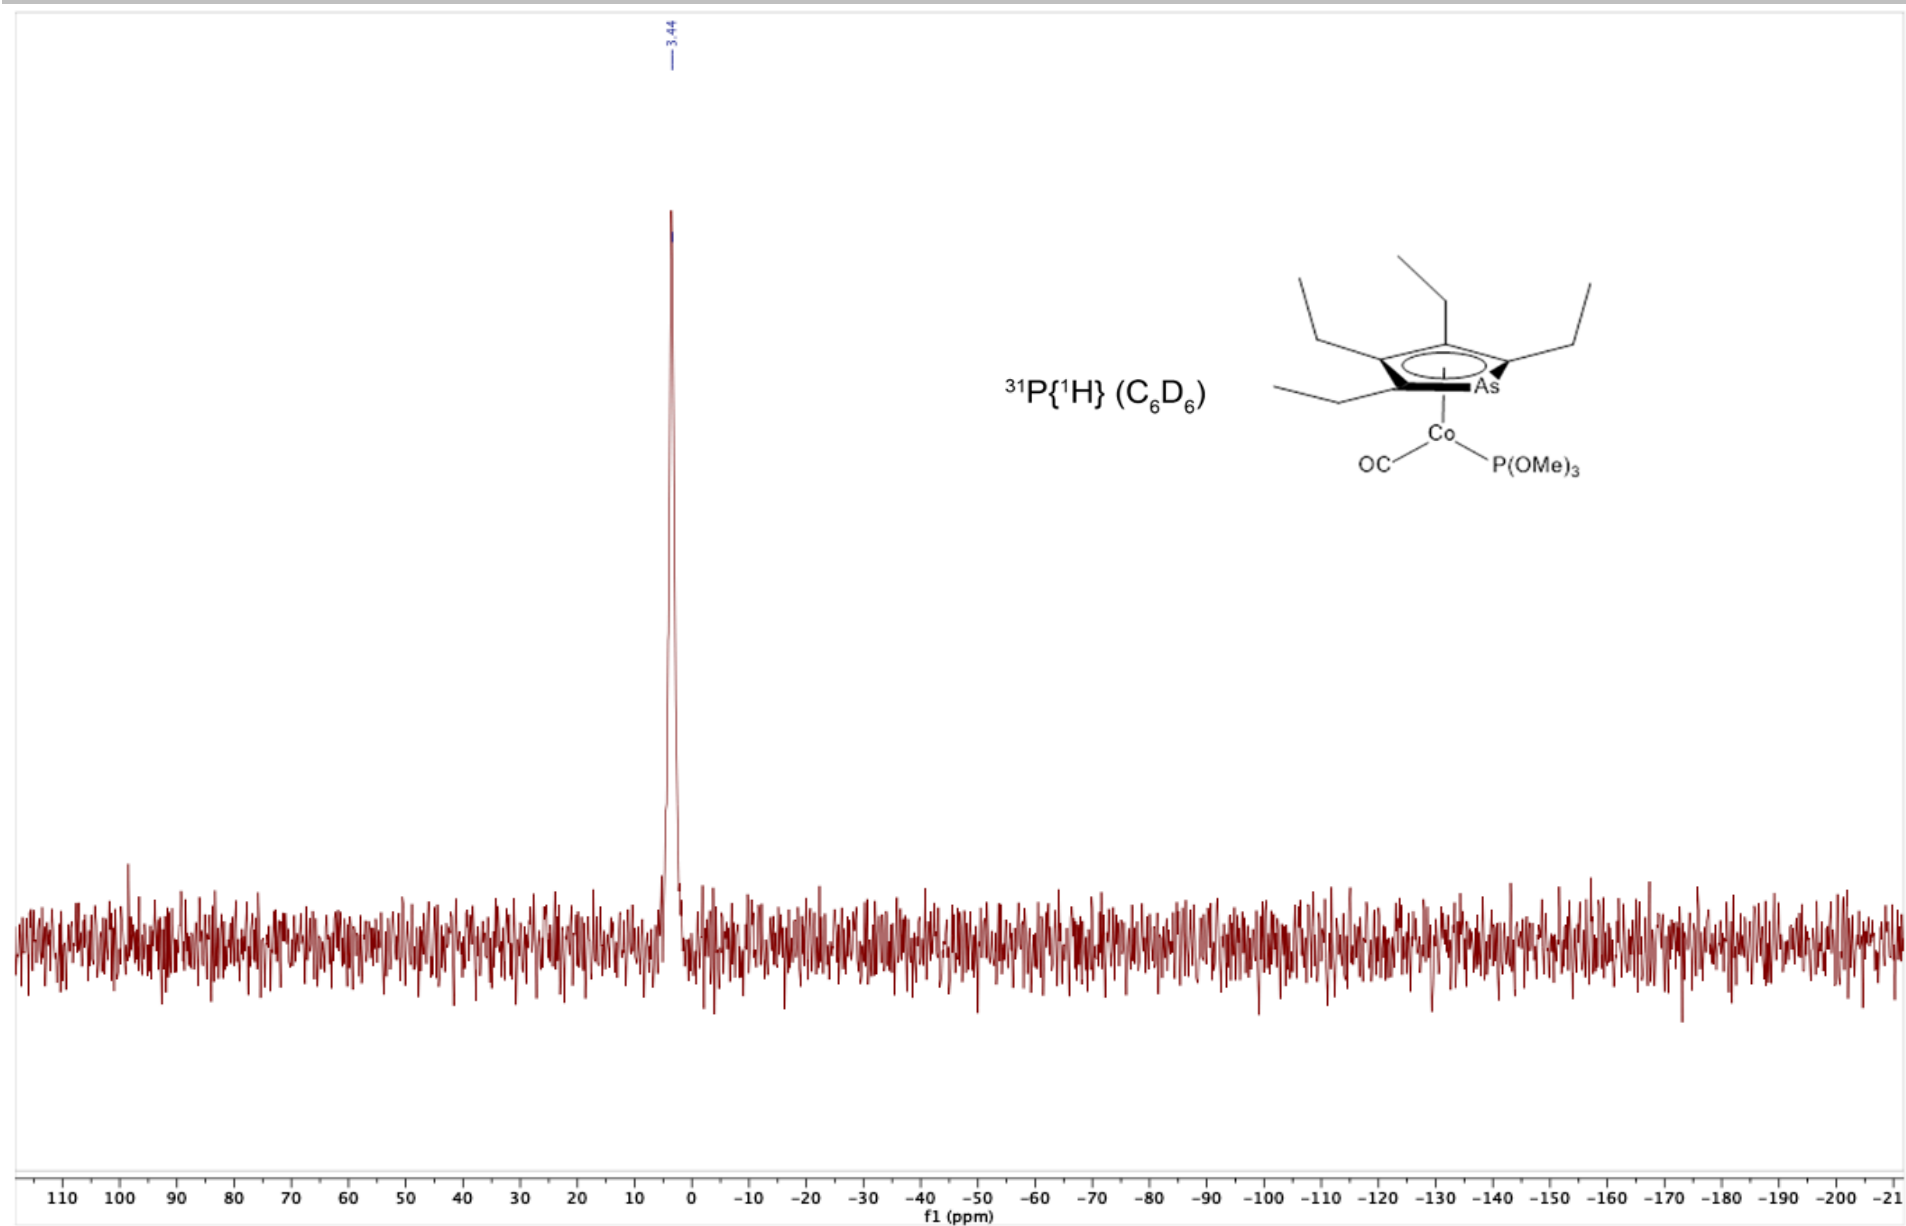



-ELECTRONIC SUPPORTING INFORMATION-

RMK-213-B-EI/AJ  
66704

Autospec Premier

07-Jun-2021

14:51:21

HR0060AFAMM (0.040) Is (1.00,1.00) C<sub>16</sub>H<sub>29</sub>AsCoO<sub>4</sub>P

Magnet EI+

8.26e12

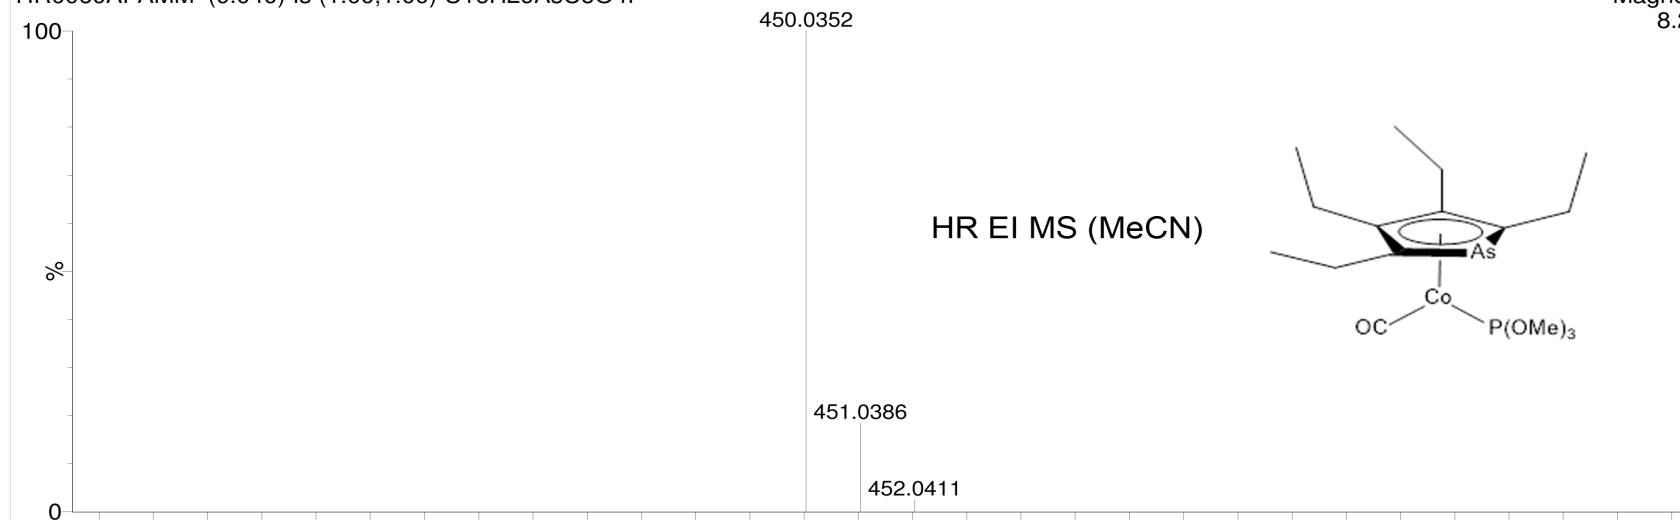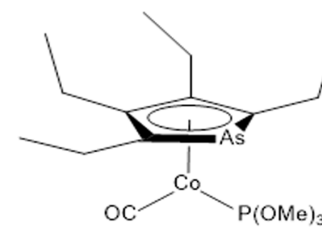

HR0060 26 (1.026)

Magnet EI+

4.27e4

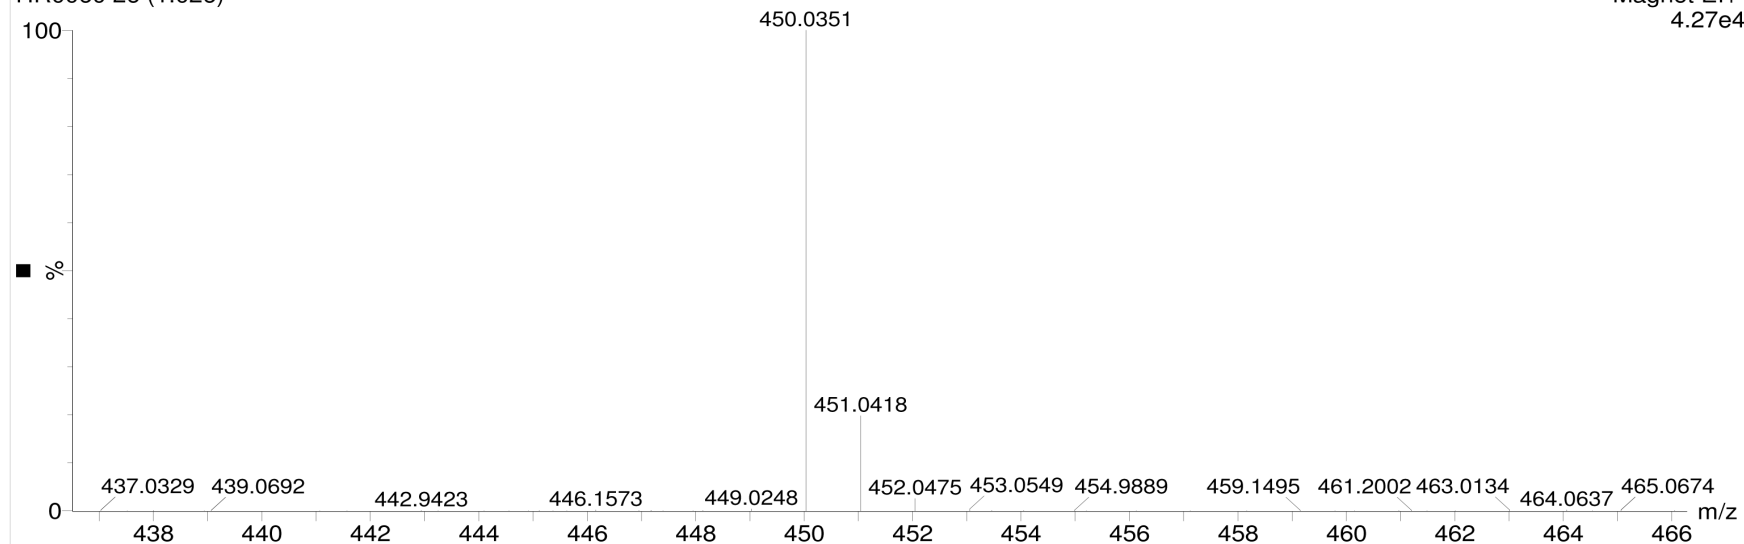

-ELECTRONIC SUPPORTING INFORMATION-

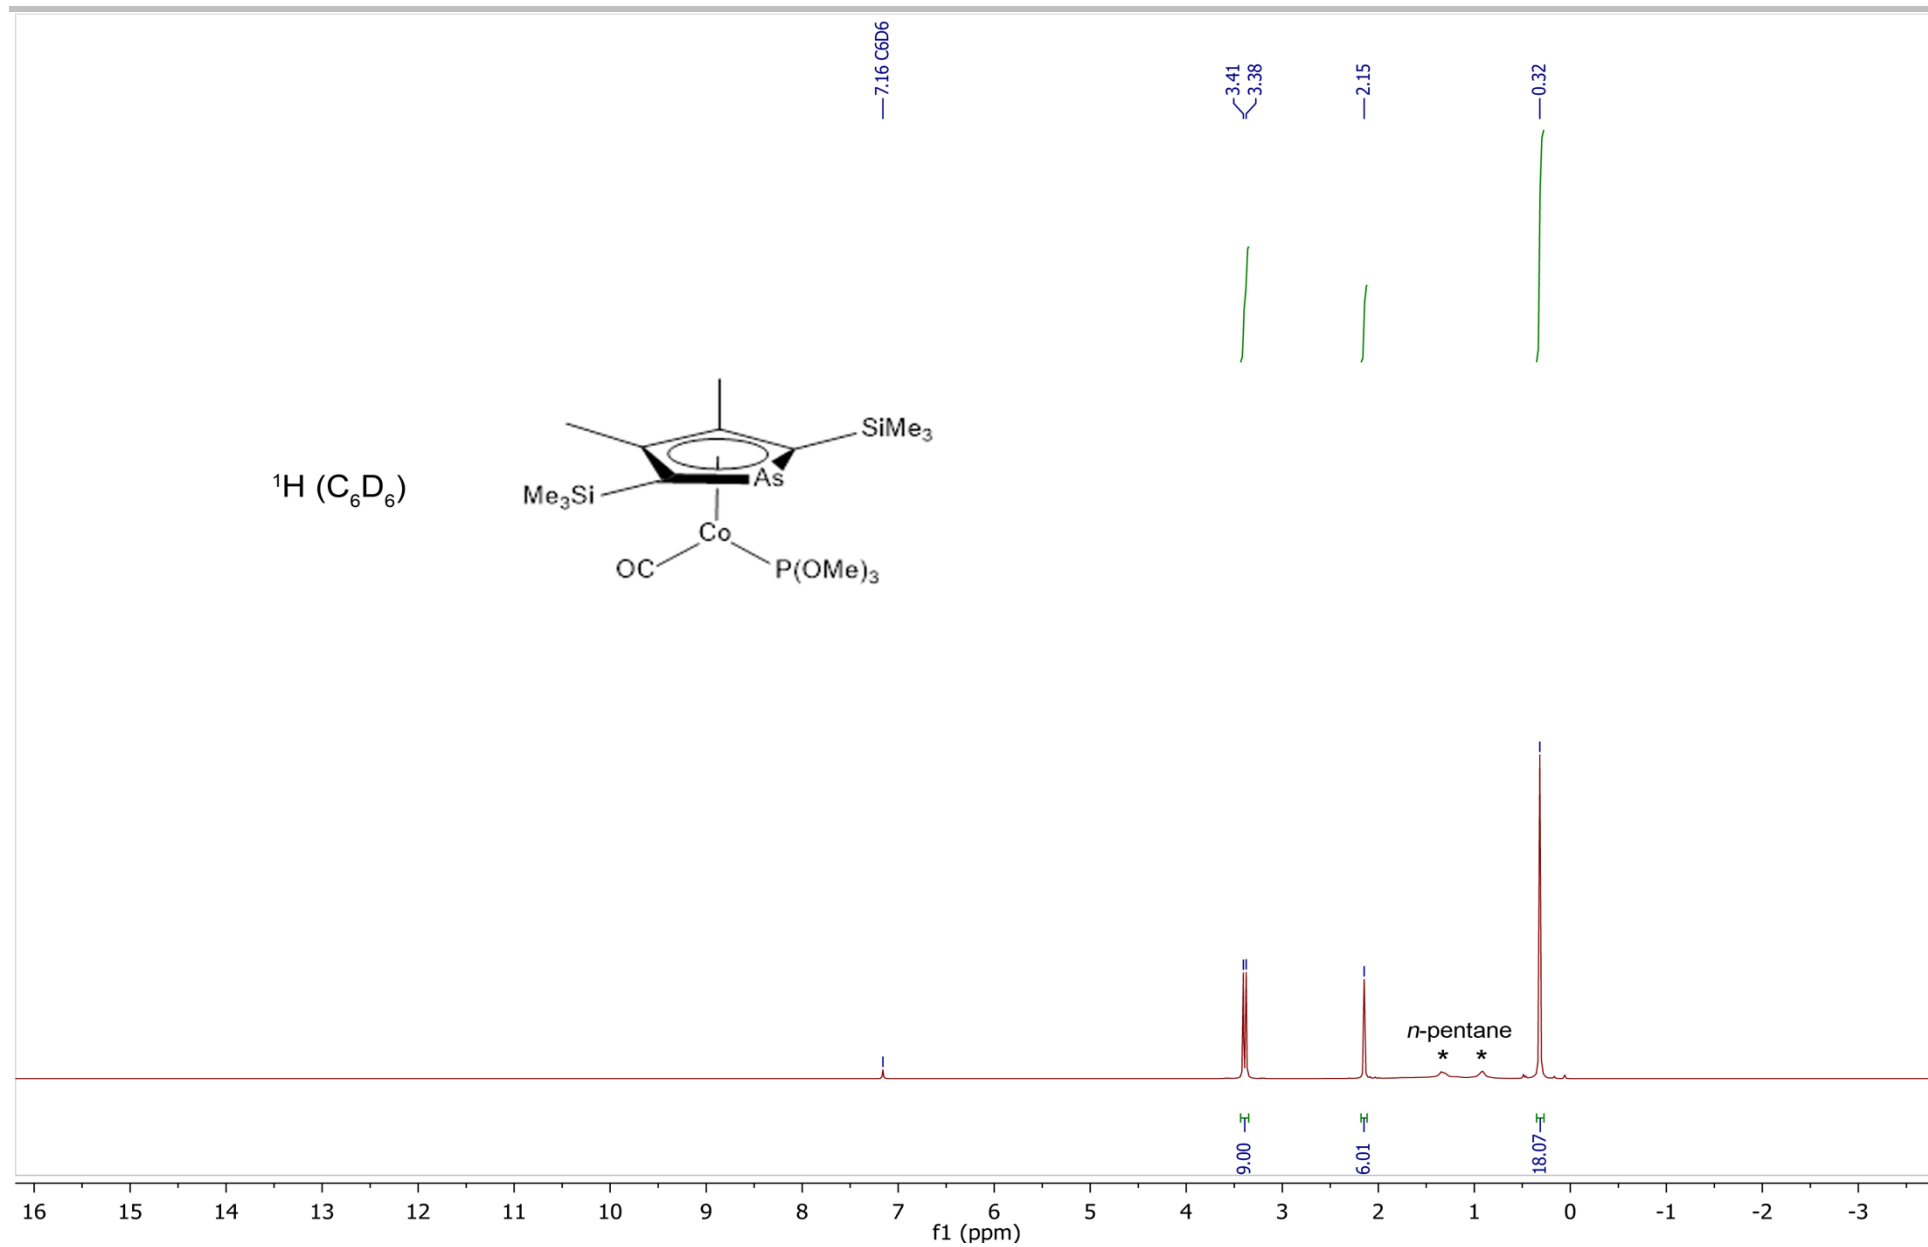

-ELECTRONIC SUPPORTING INFORMATION-

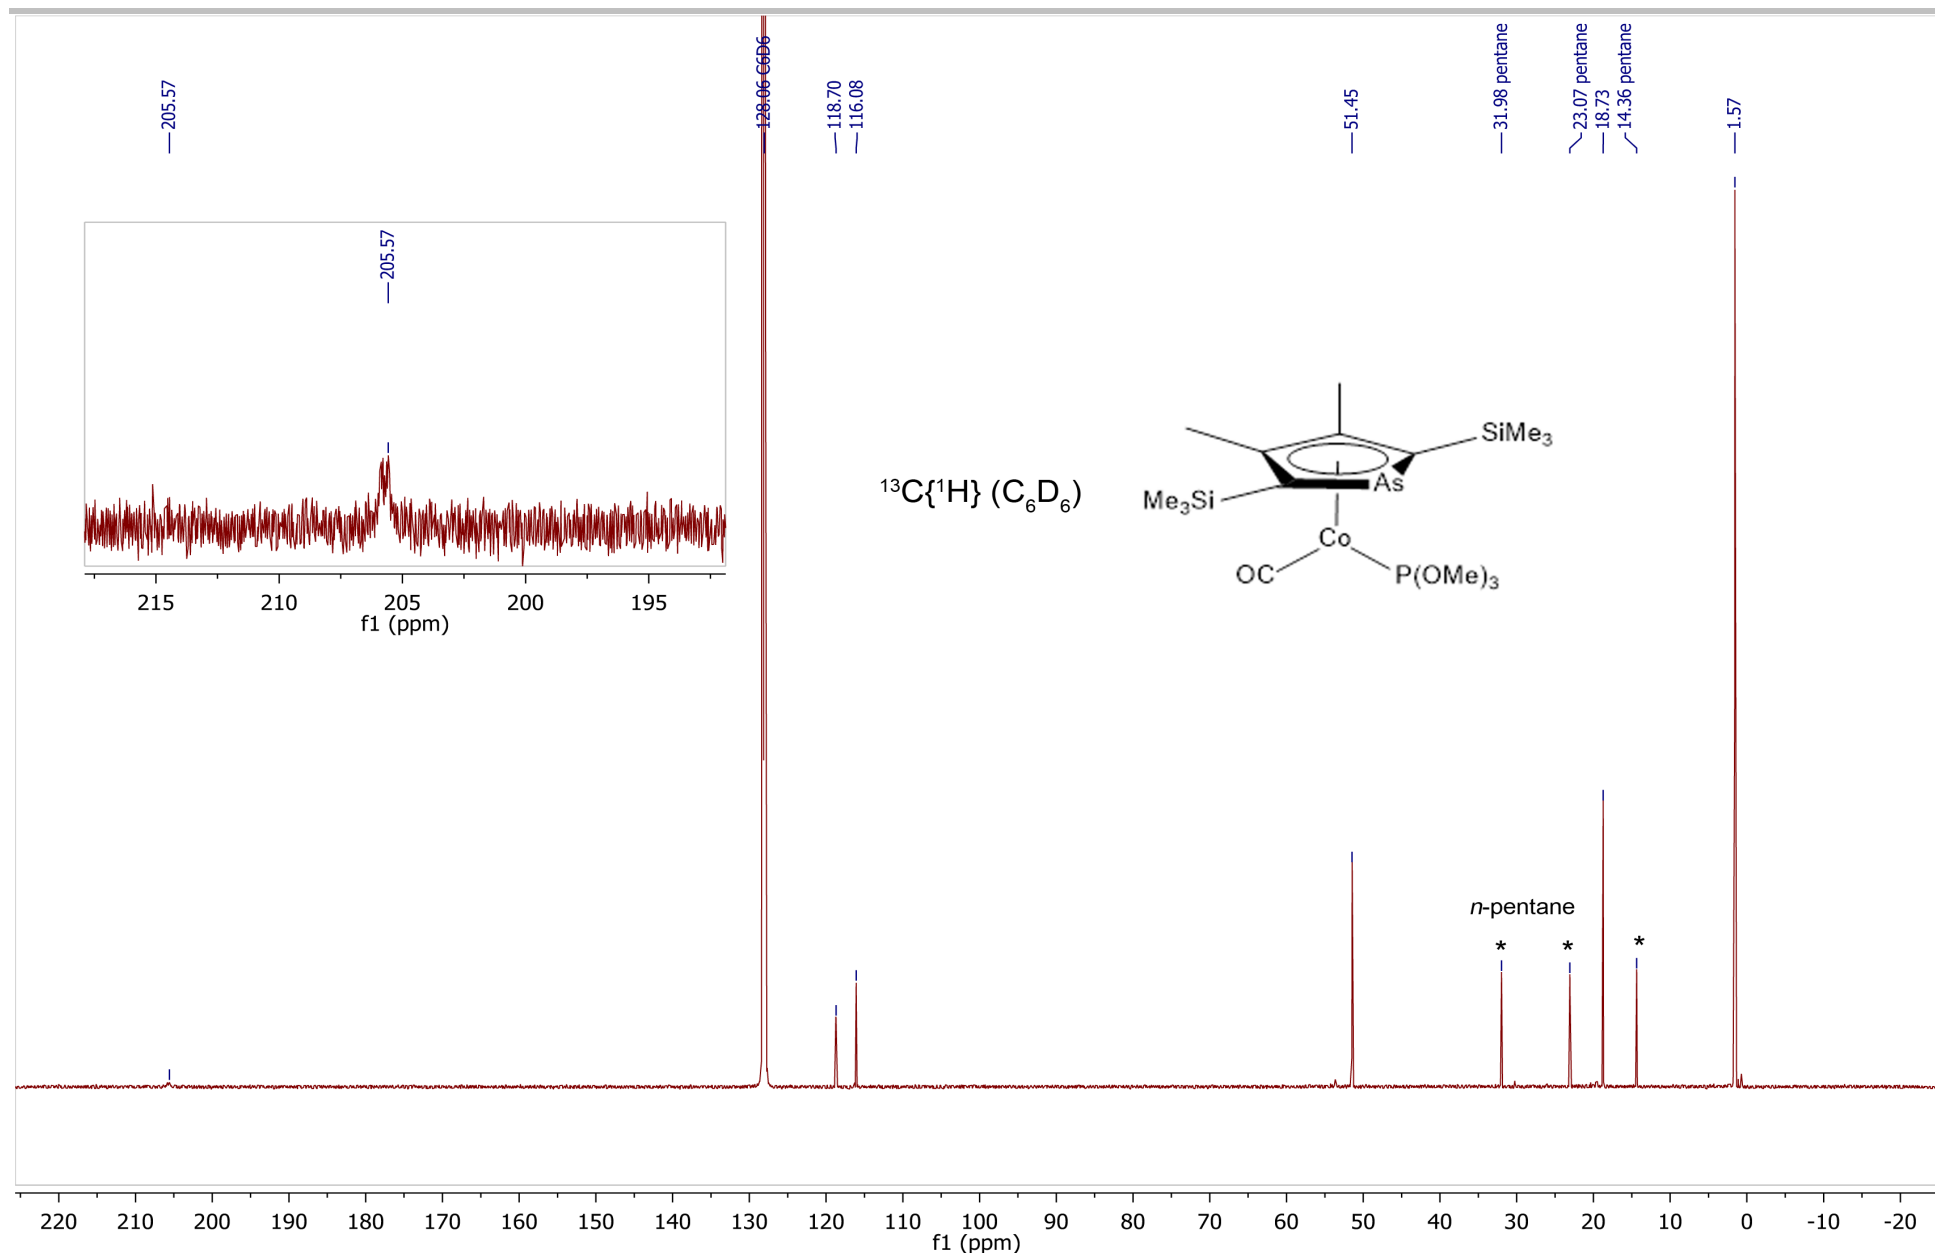

-ELECTRONIC SUPPORTING INFORMATION-

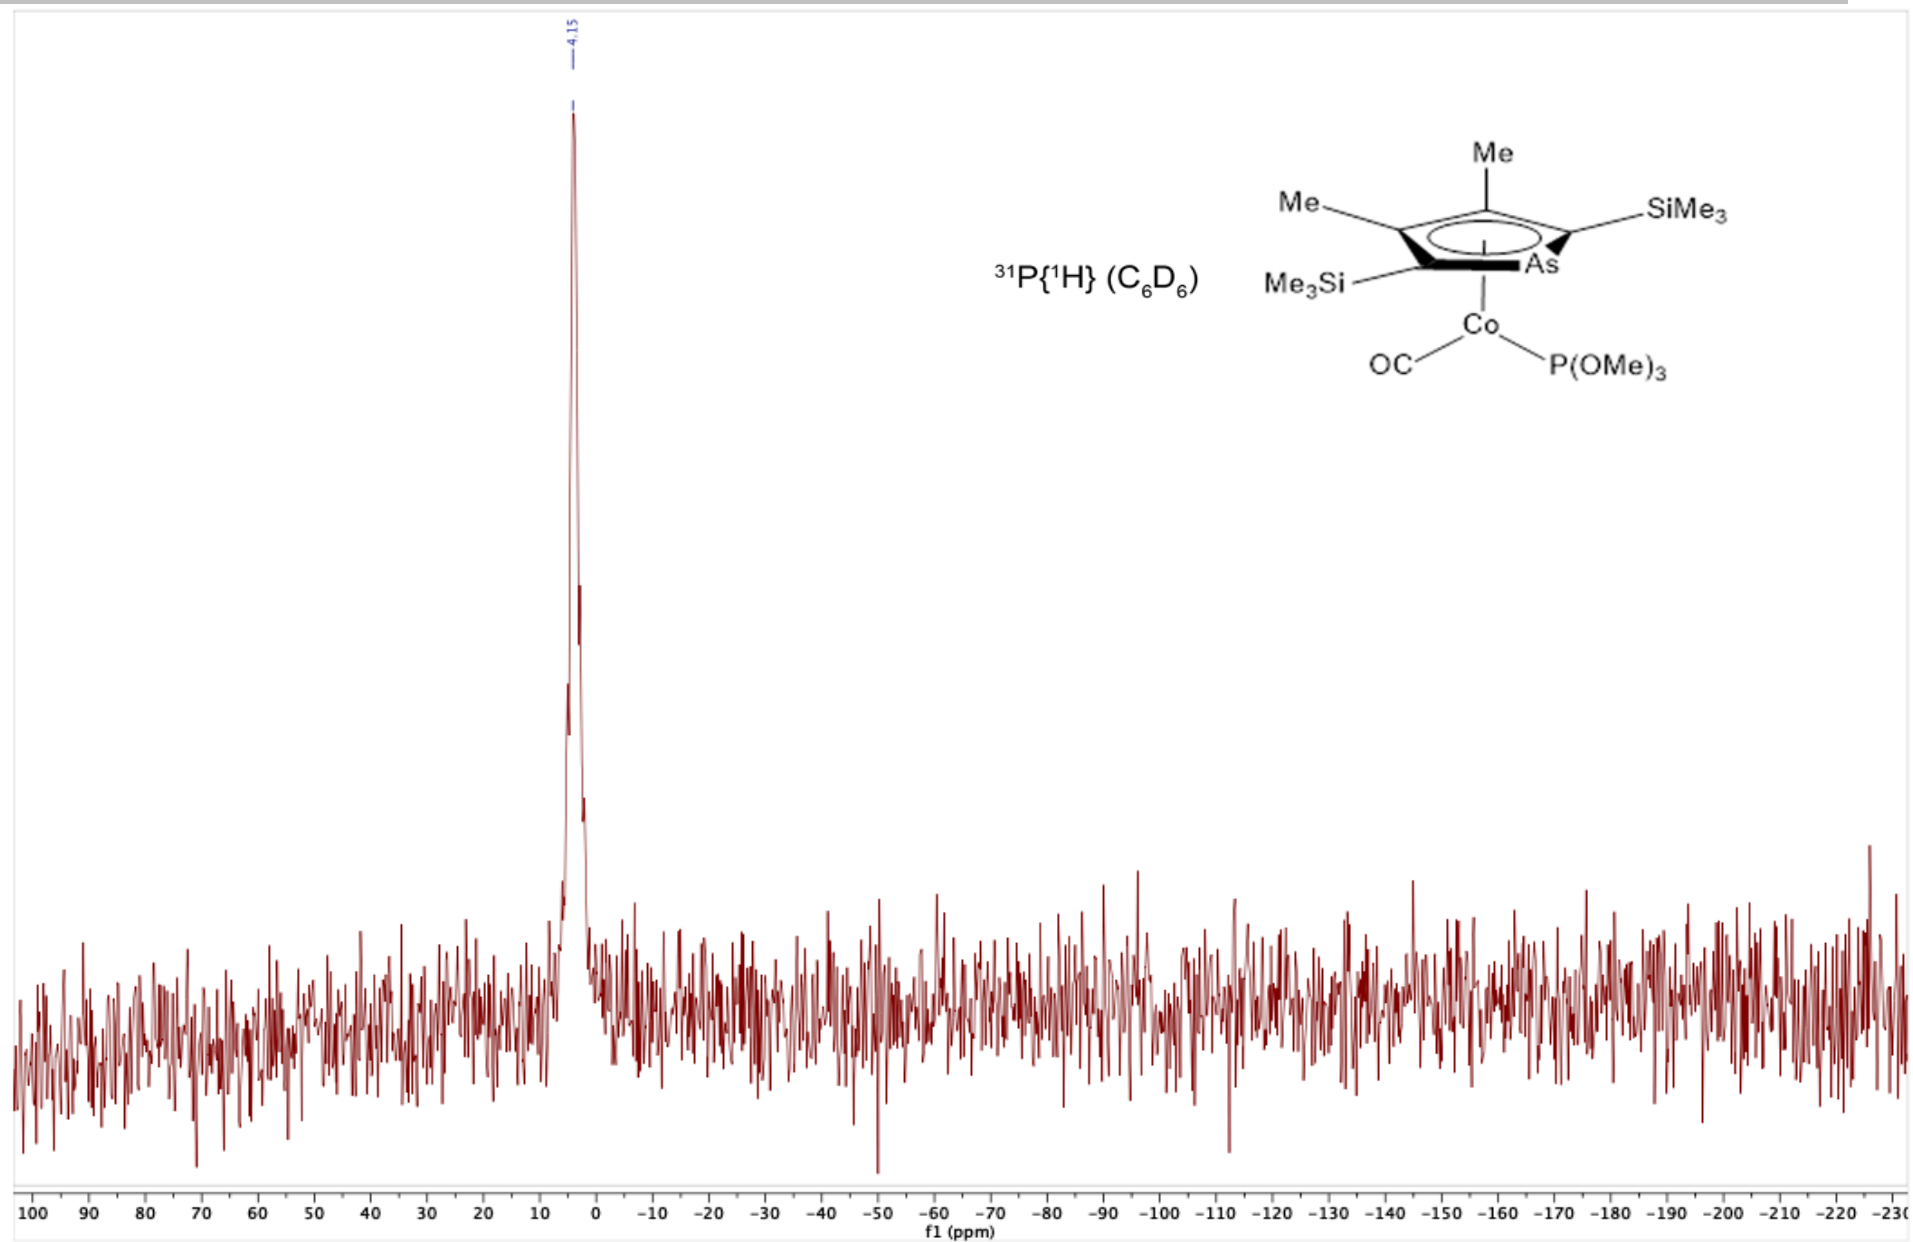



-ELECTRONIC SUPPORTING INFORMATION-

RMK-209-C

2021\_RSC Small molecule sample list

SYNAPTG2-Si#NotSet

13-Apr-2021

11:37:49

0389 (0.023) Is (1.00,0.10) C<sub>20</sub>H<sub>24</sub>As<sub>2</sub>Cl<sub>3</sub>Co<sub>2</sub>Hg<sub>2</sub>O<sub>4</sub>

1: TOF MS ES+  
1.43e12

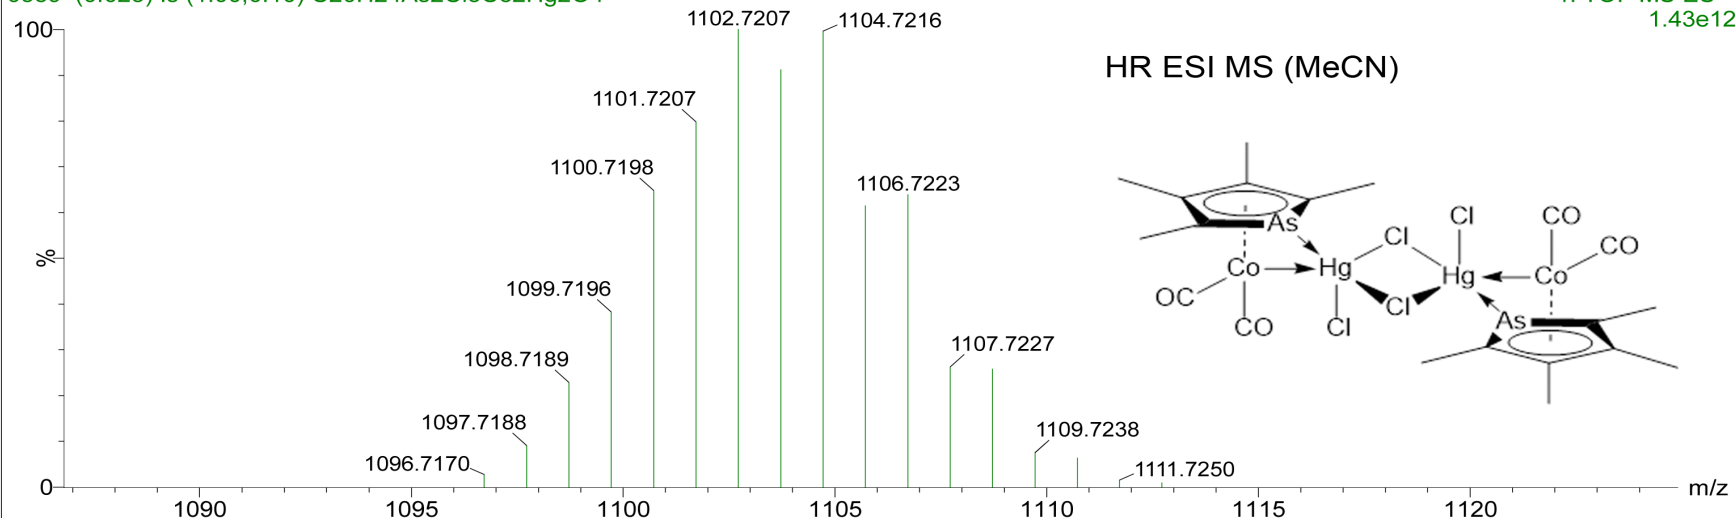

0389 63 (0.141) Cm (51:70)

1: TOF MS ES+  
1.86e6

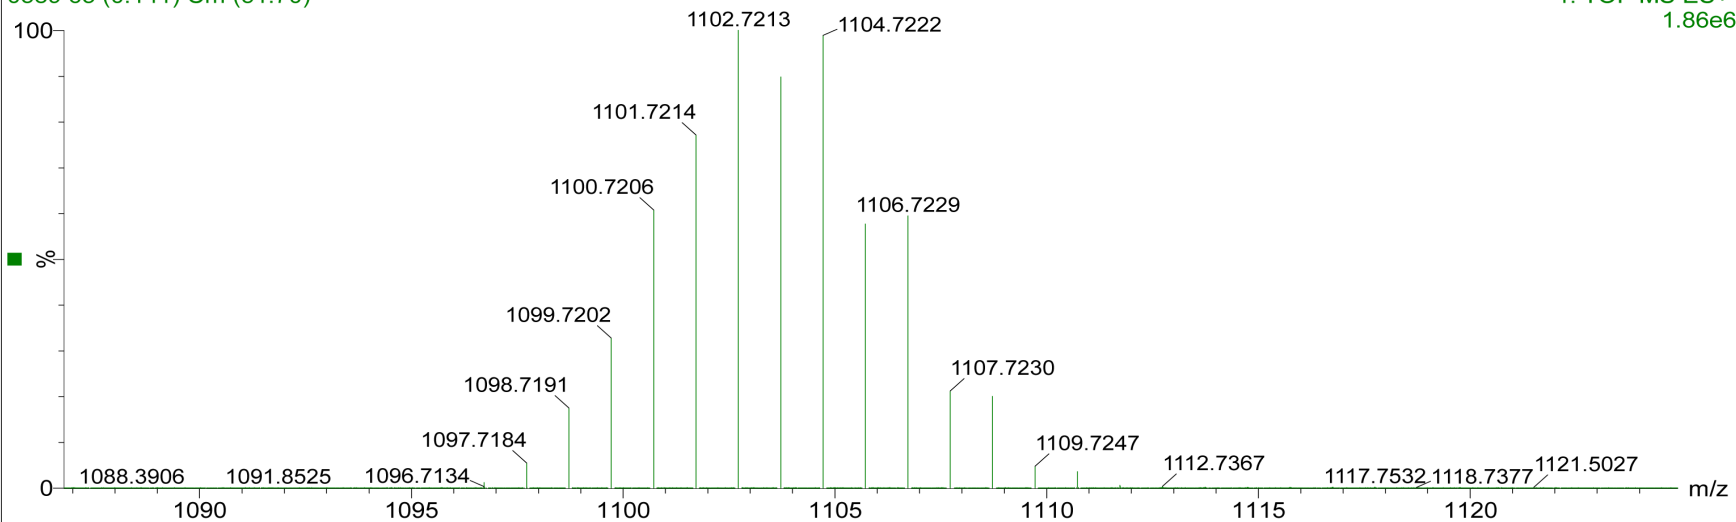

-ELECTRONIC SUPPORTING INFORMATION-

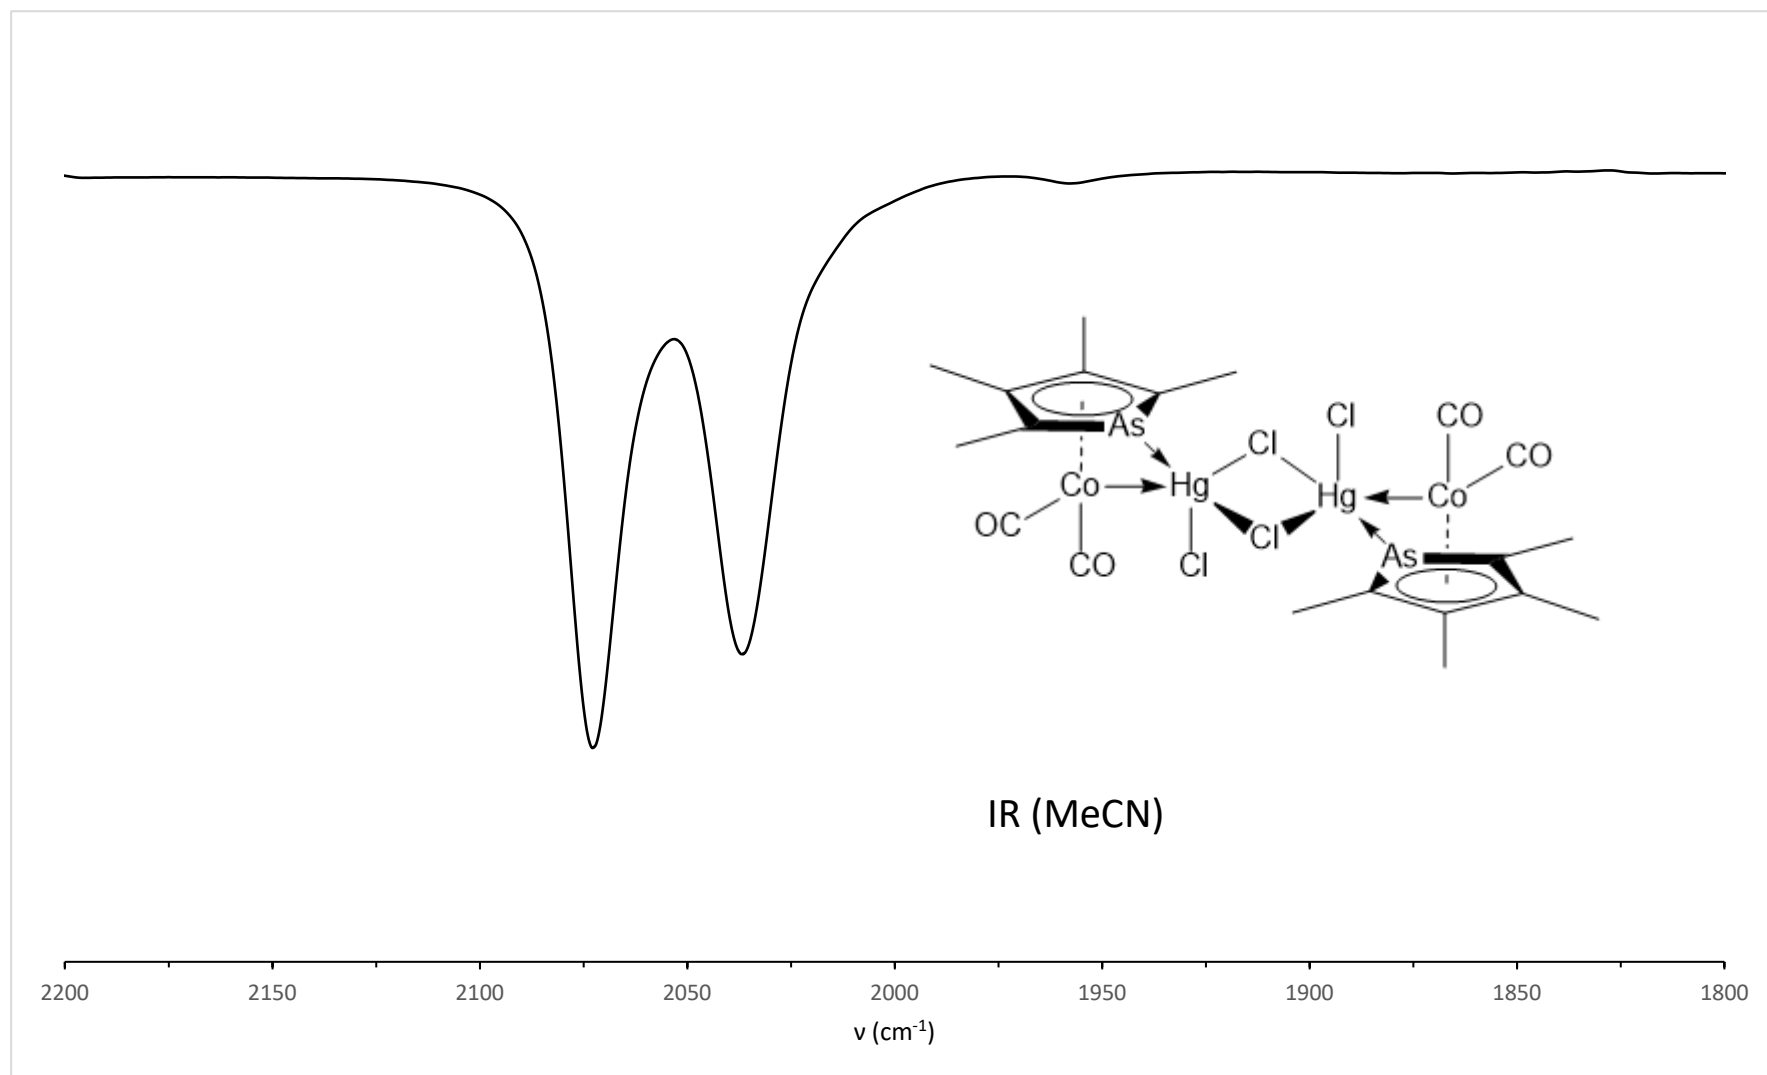

-ELECTRONIC SUPPORTING INFORMATION-

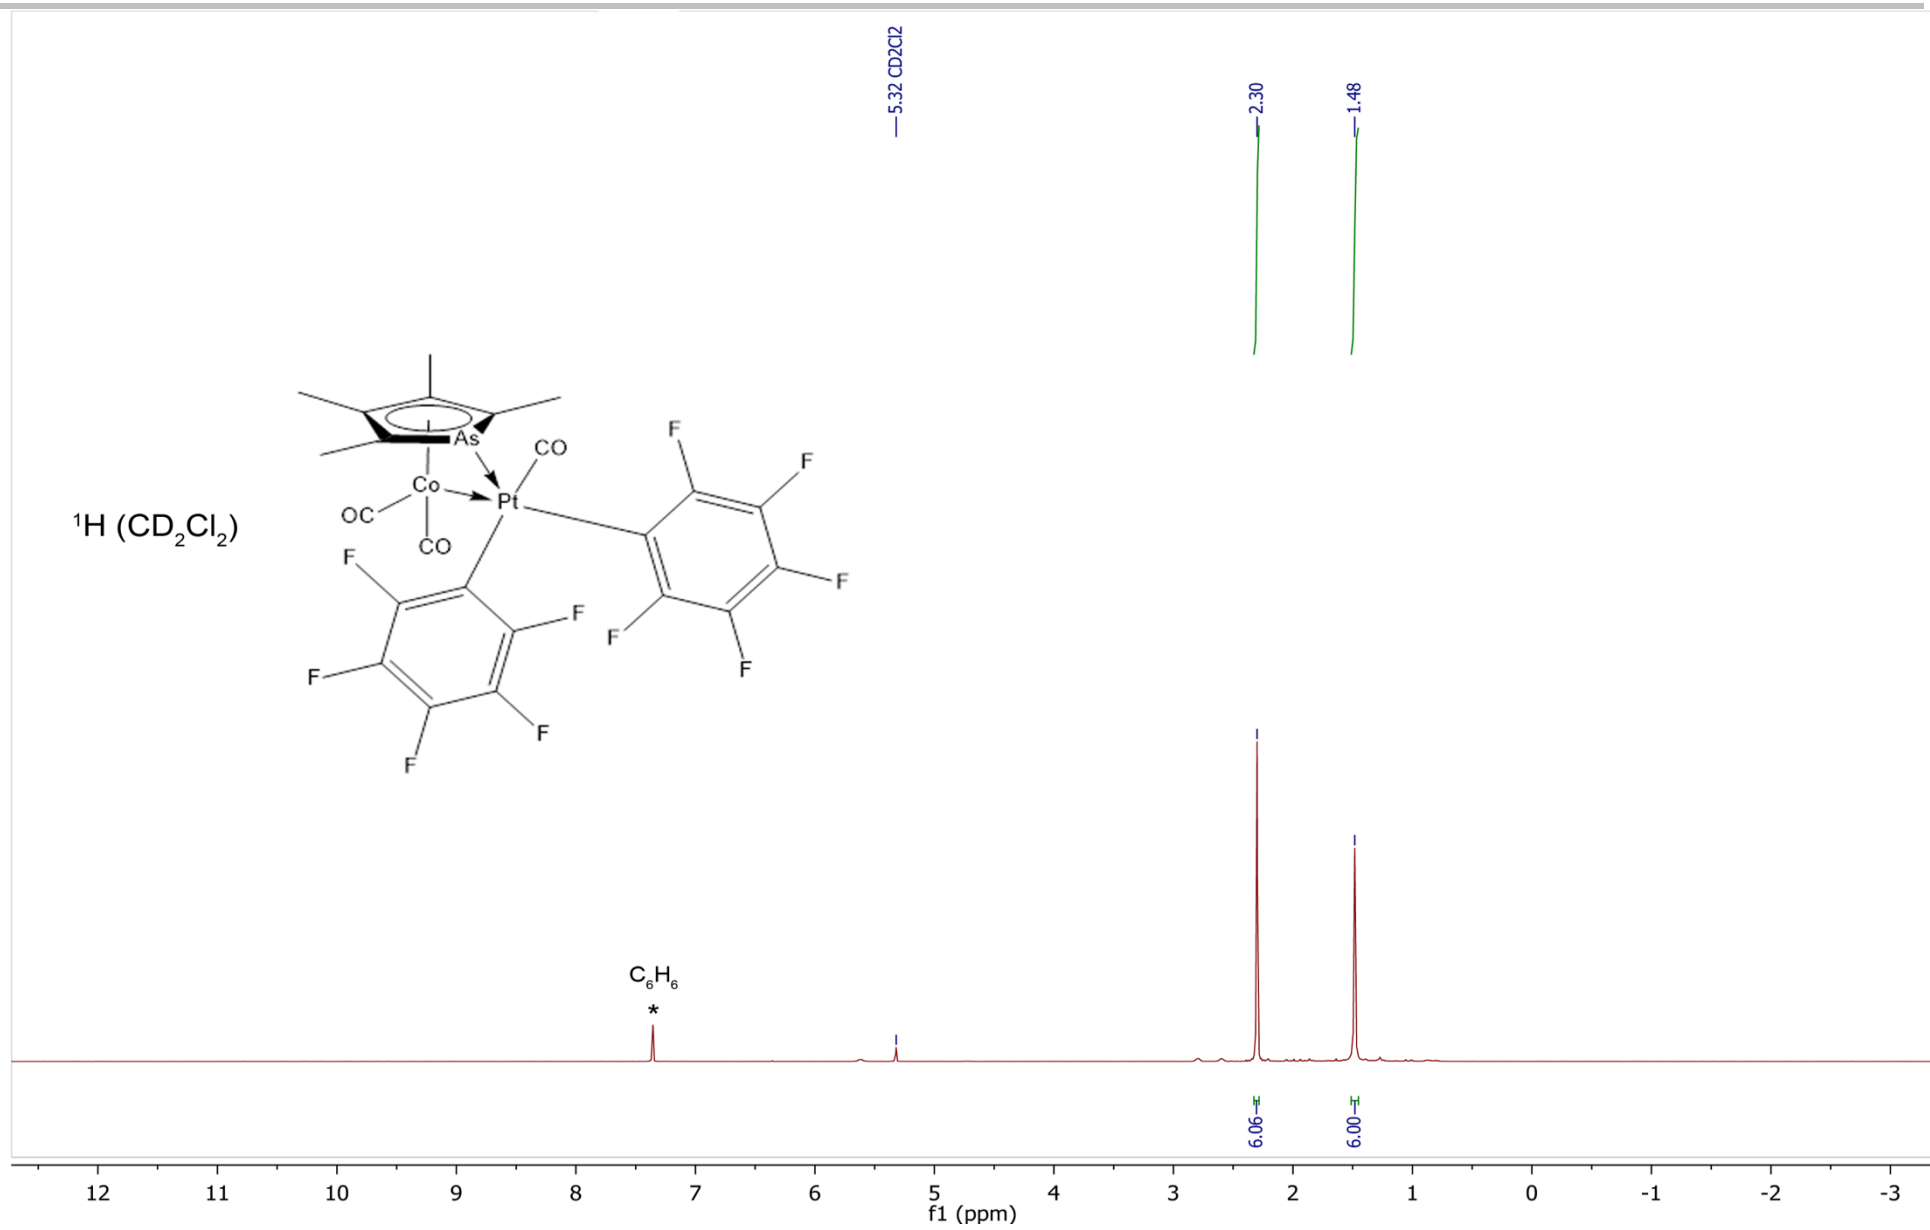



-ELECTRONIC SUPPORTING INFORMATION-

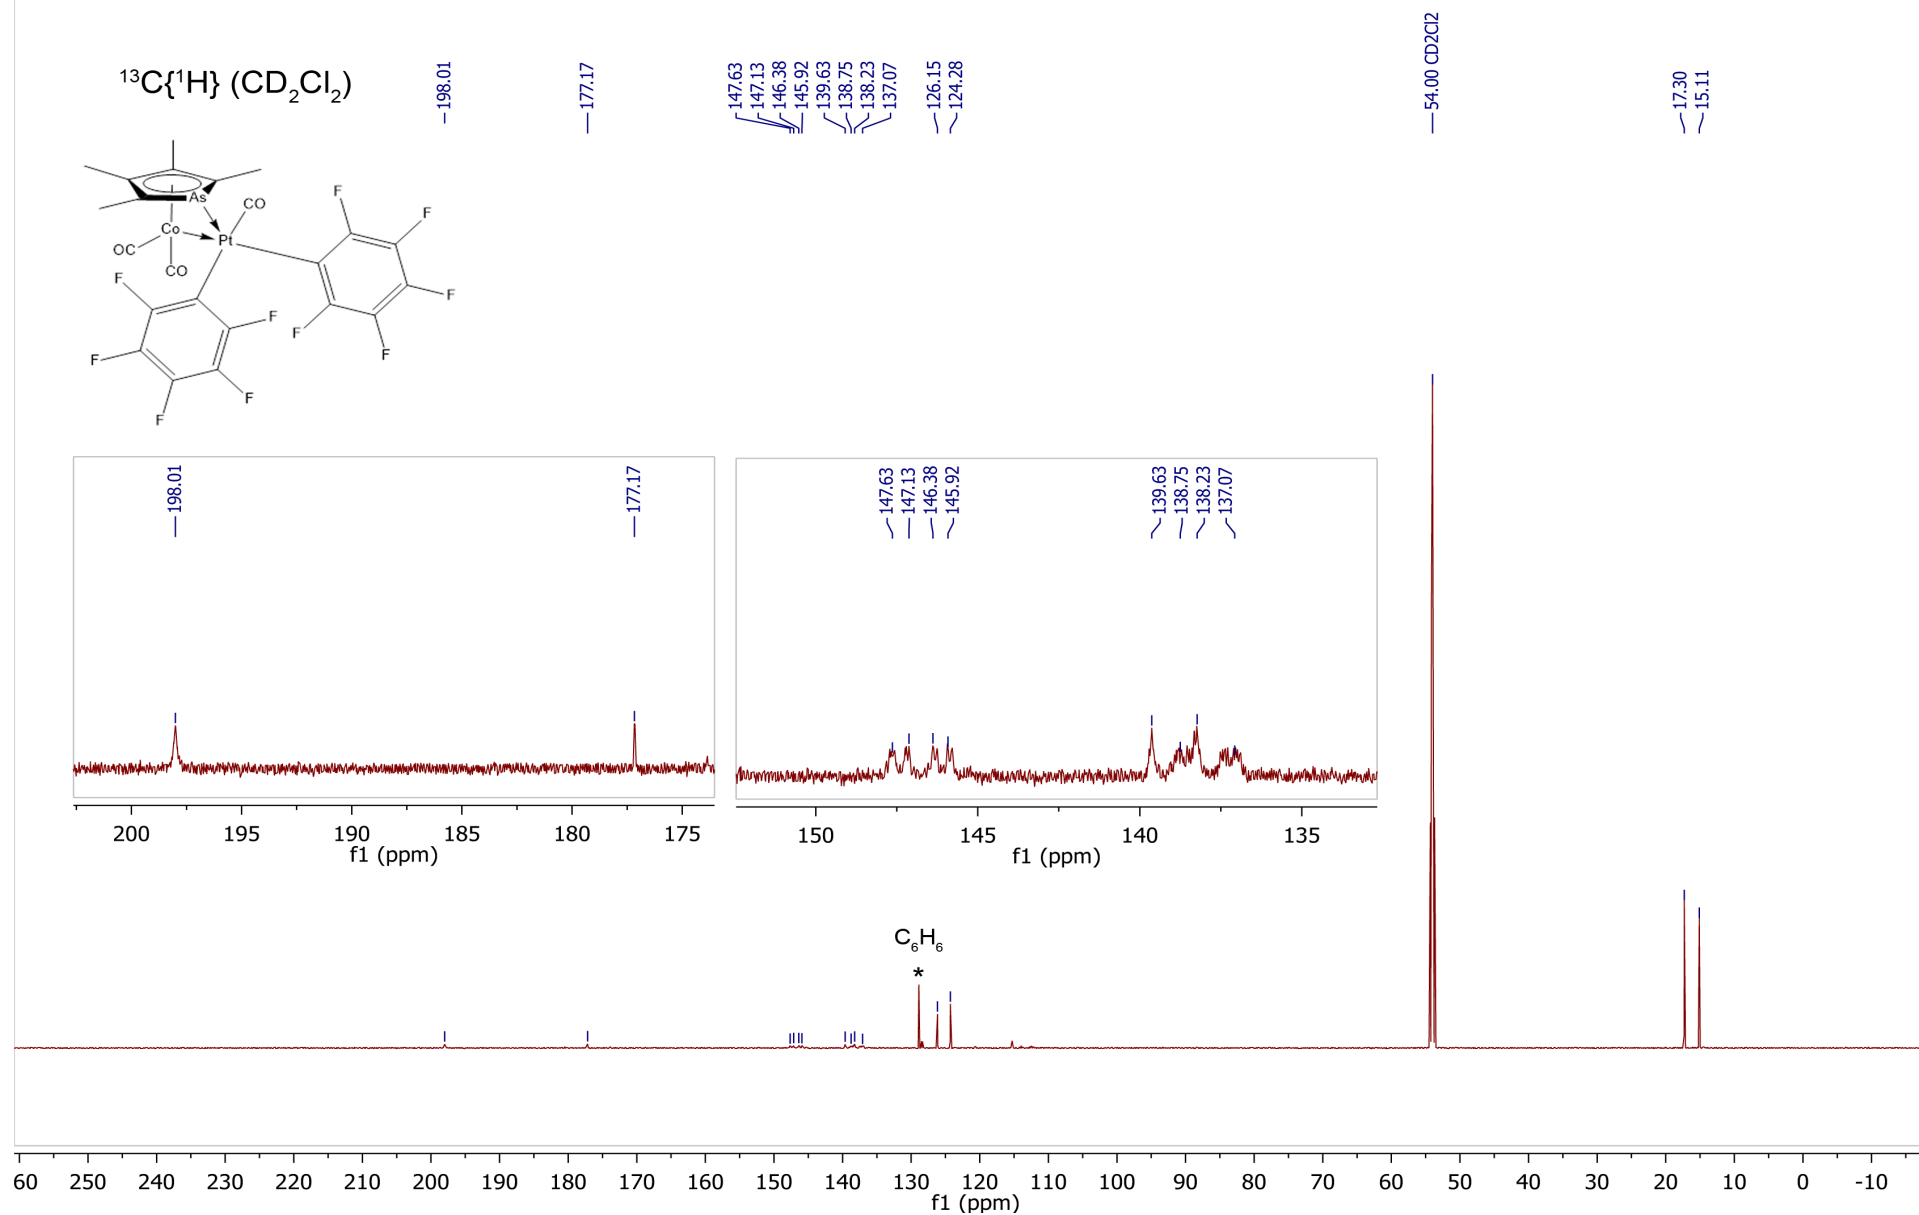

-ELECTRONIC SUPPORTING INFORMATION-

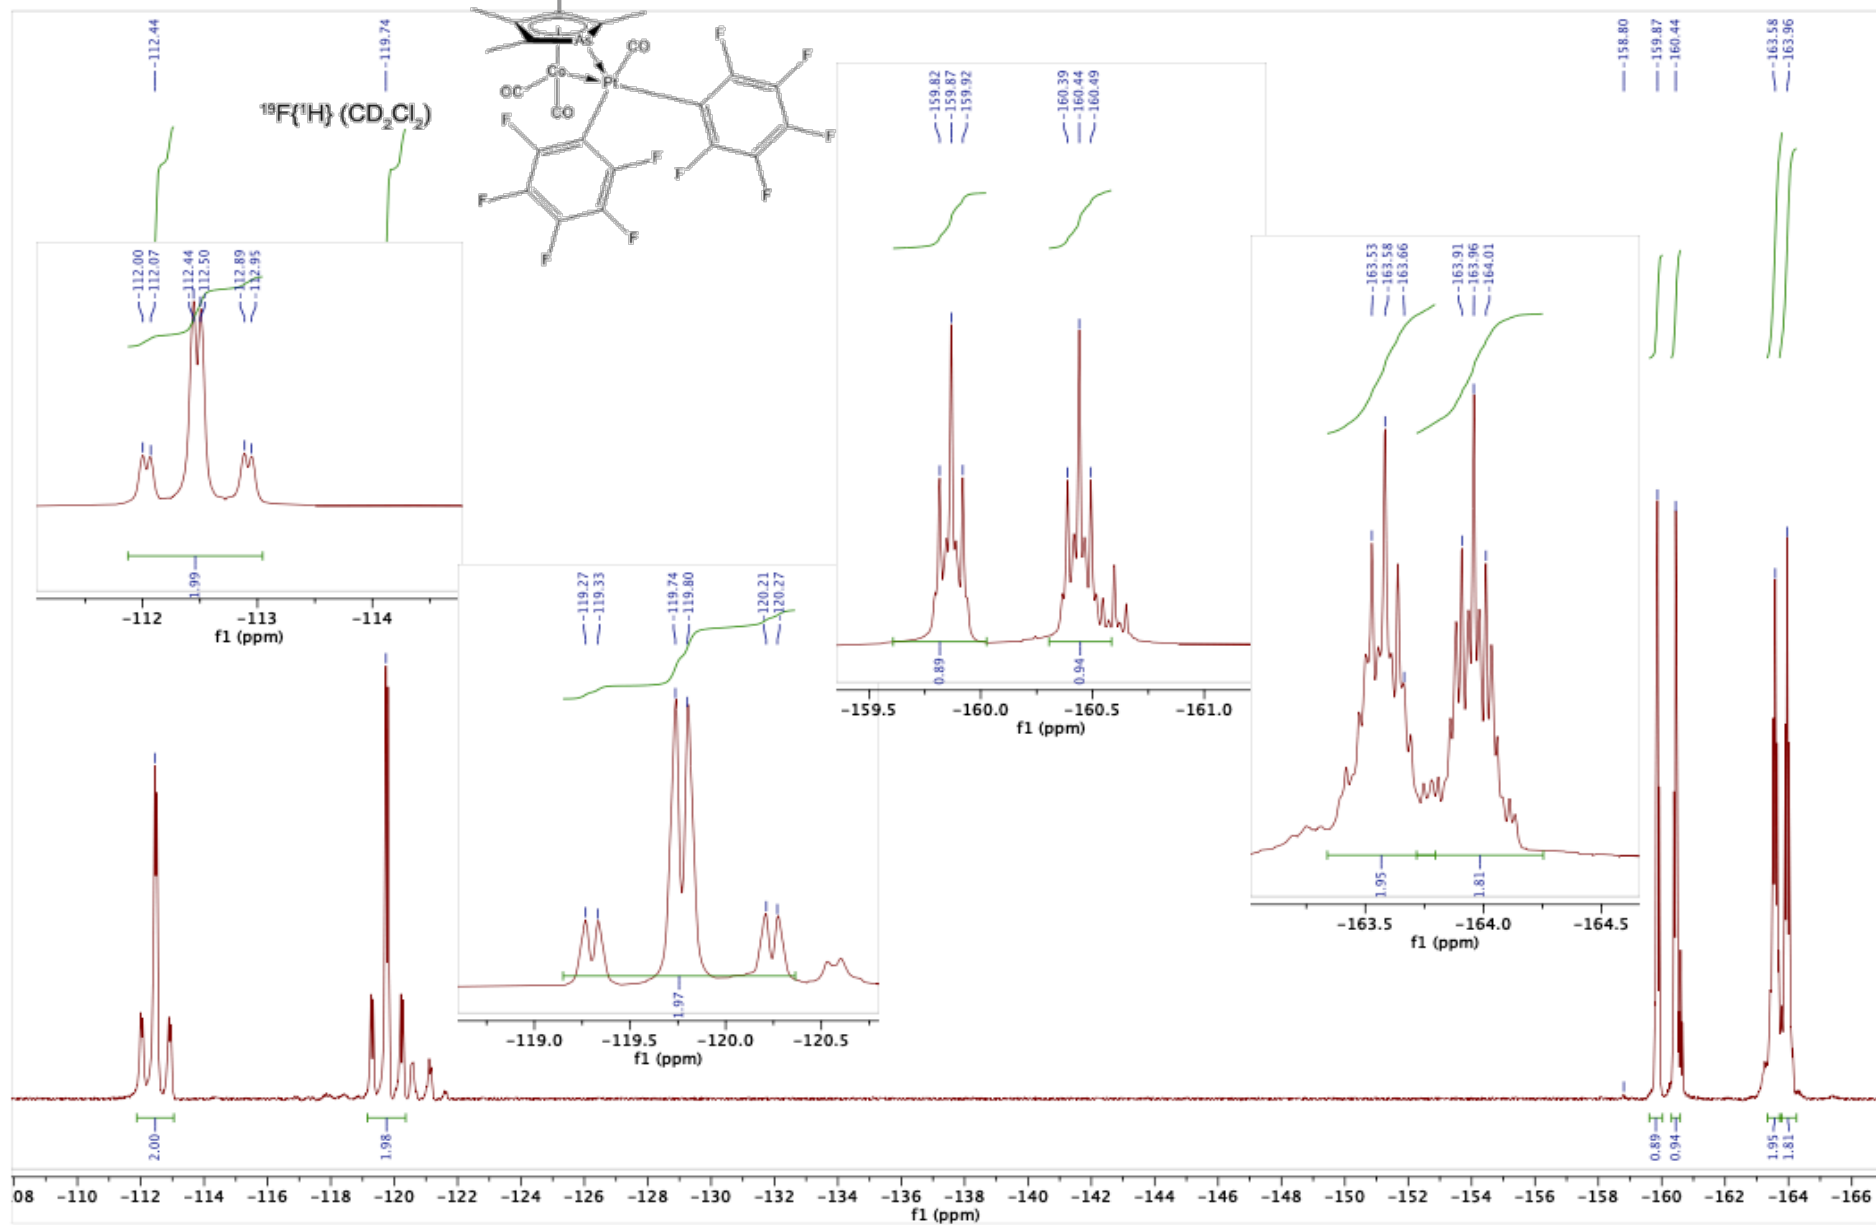

-ELECTRONIC SUPPORTING INFORMATION-

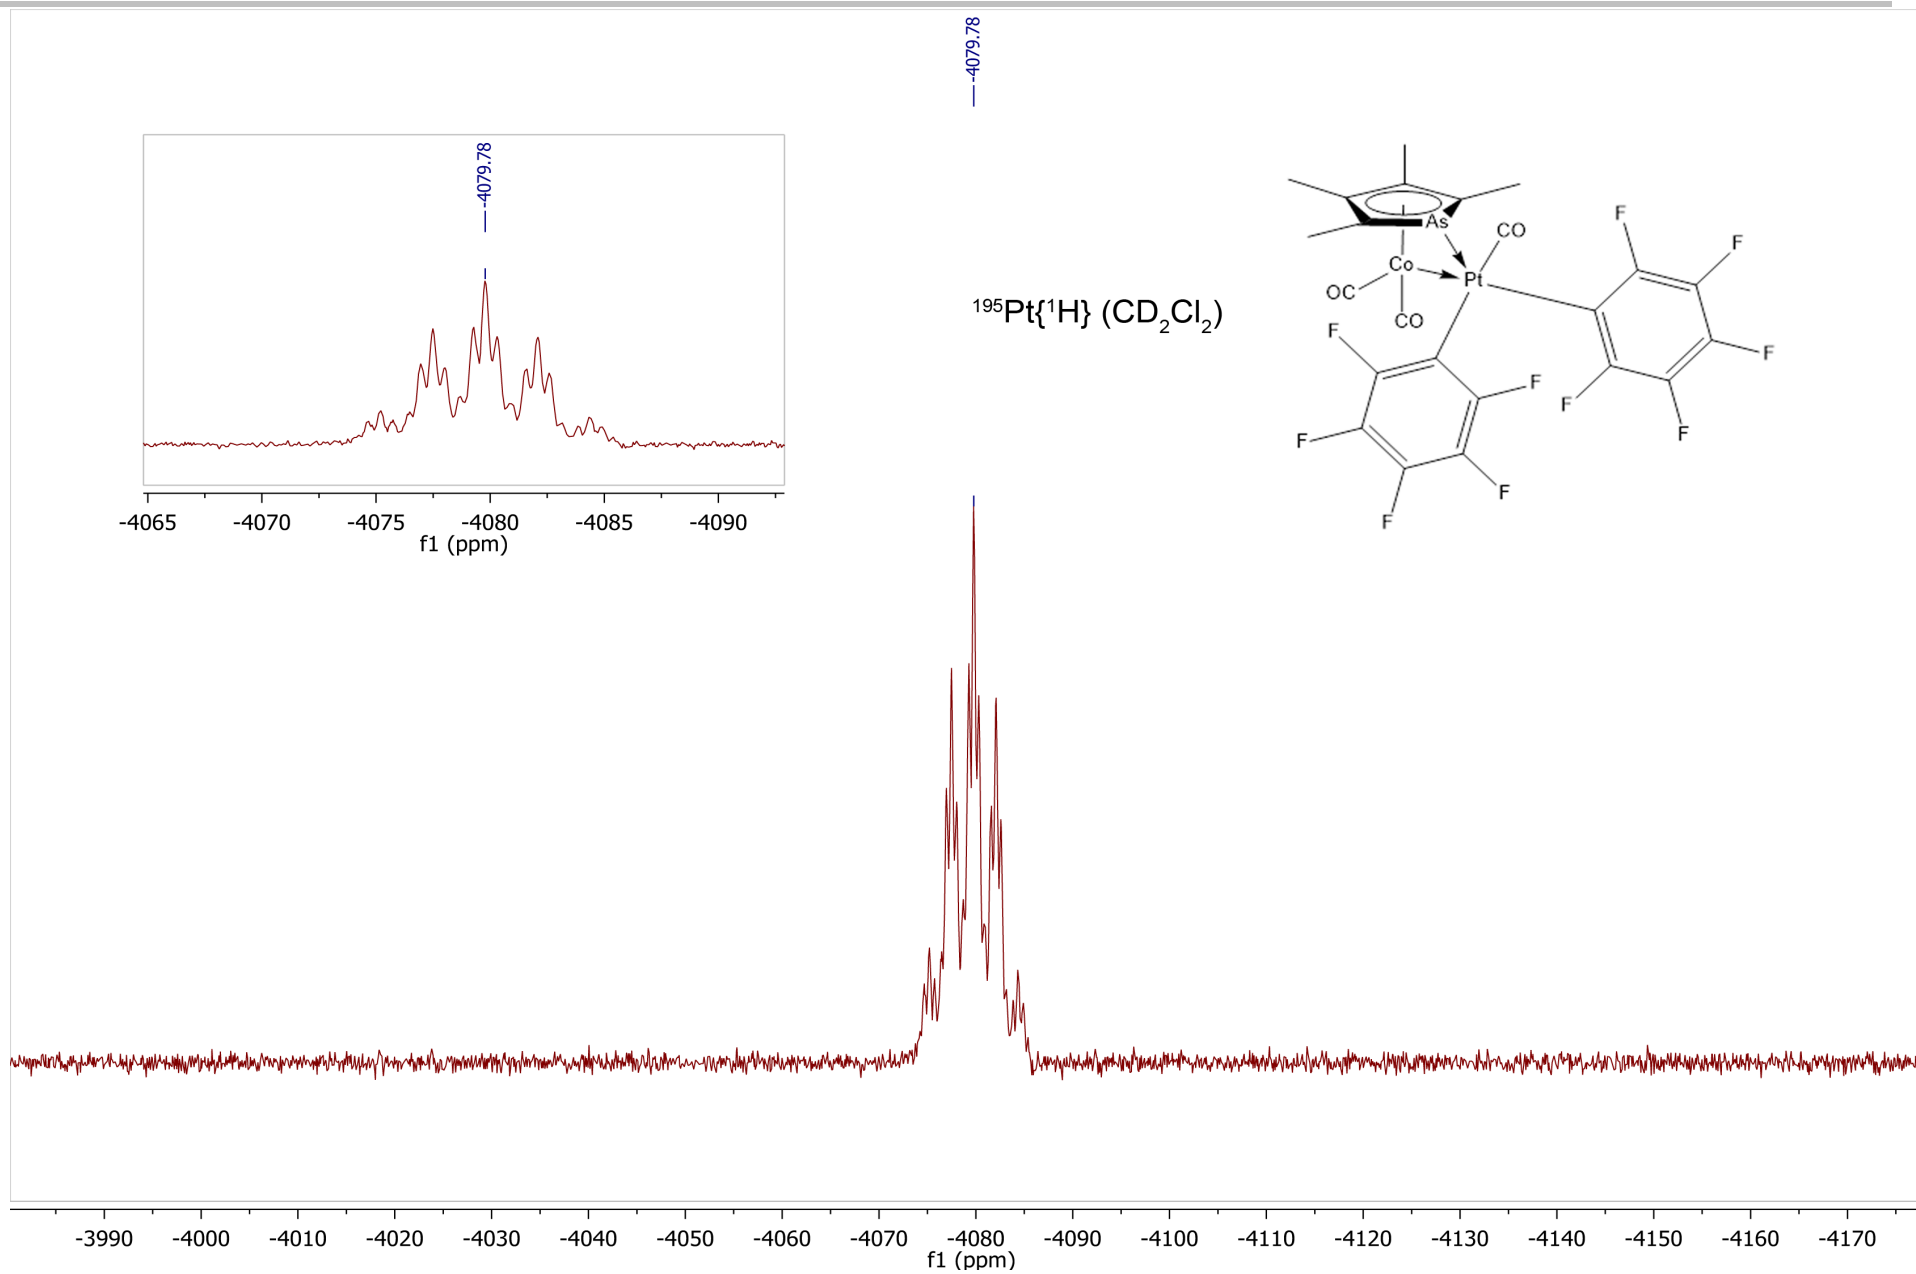

-ELECTRONIC SUPPORTING INFORMATION-

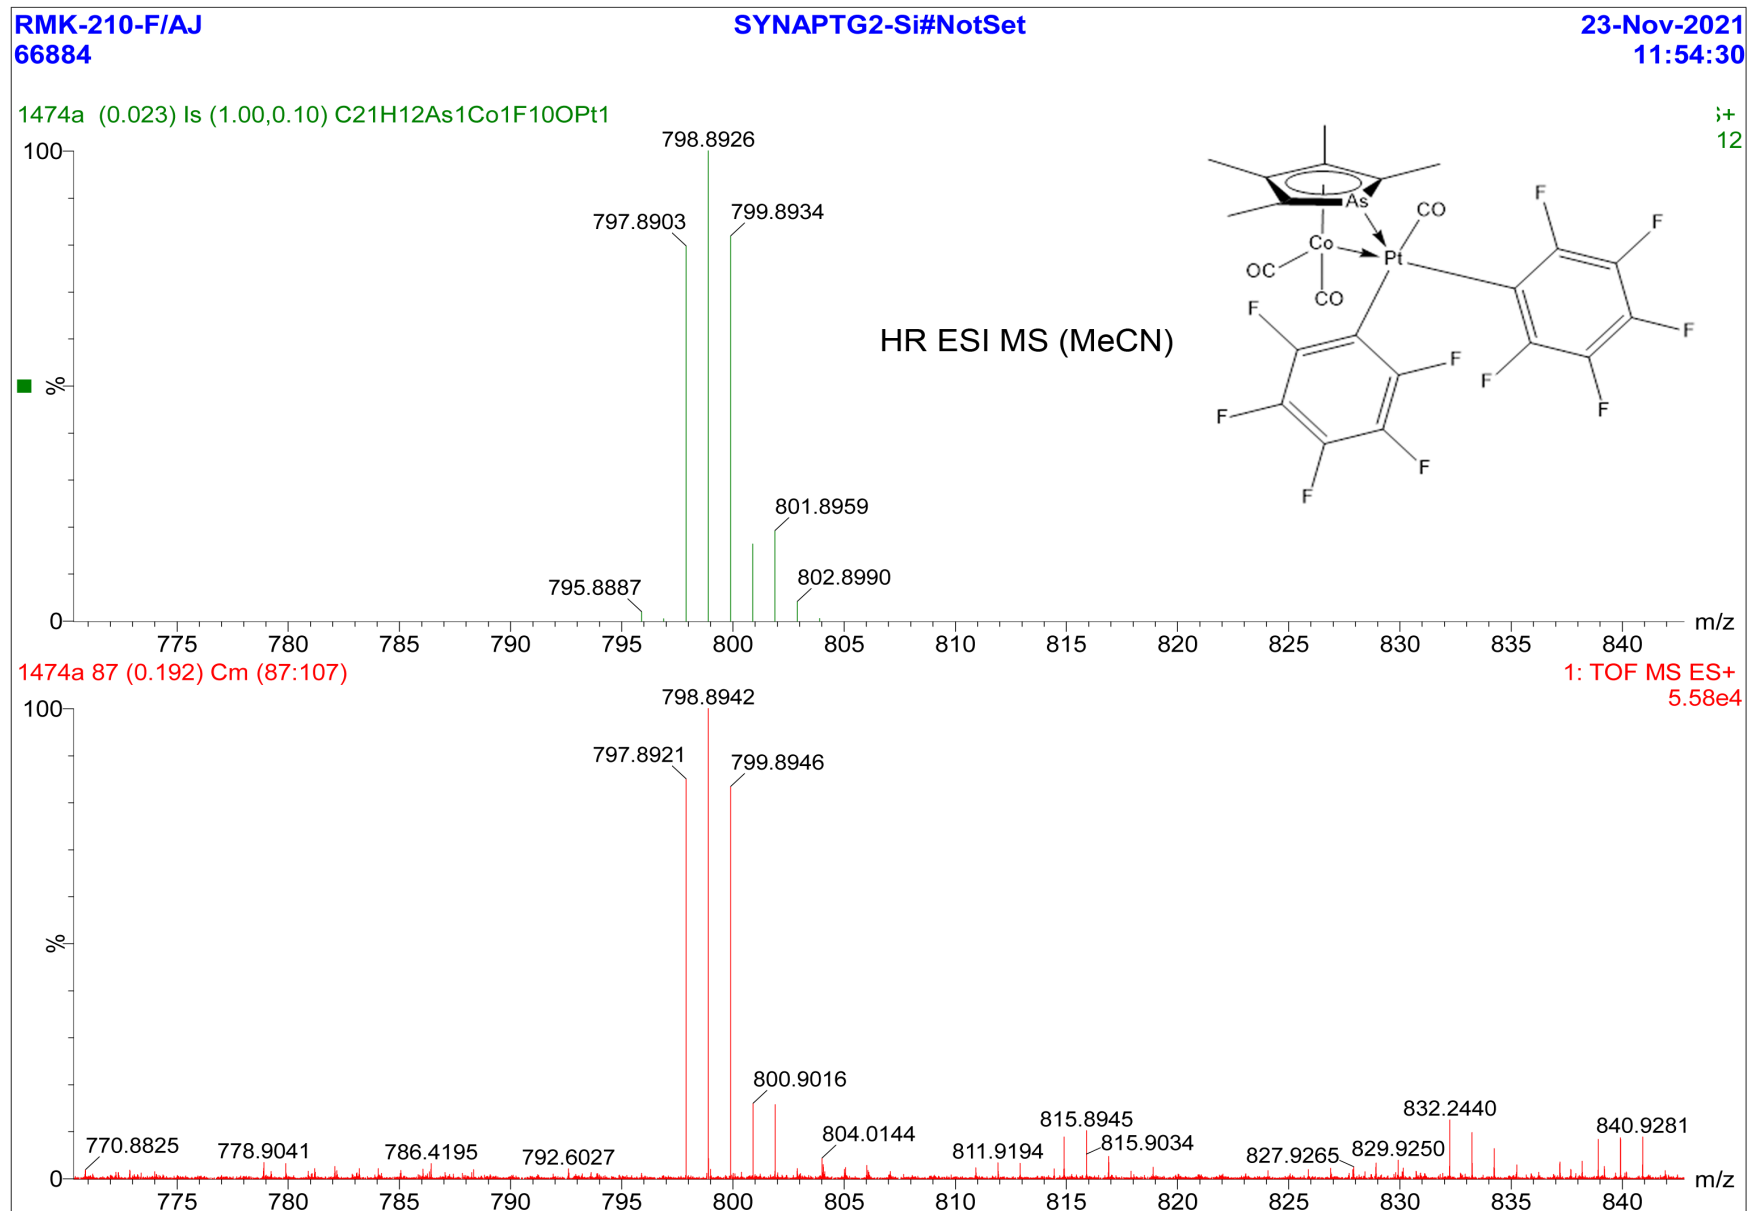

-ELECTRONIC SUPPORTING INFORMATION-

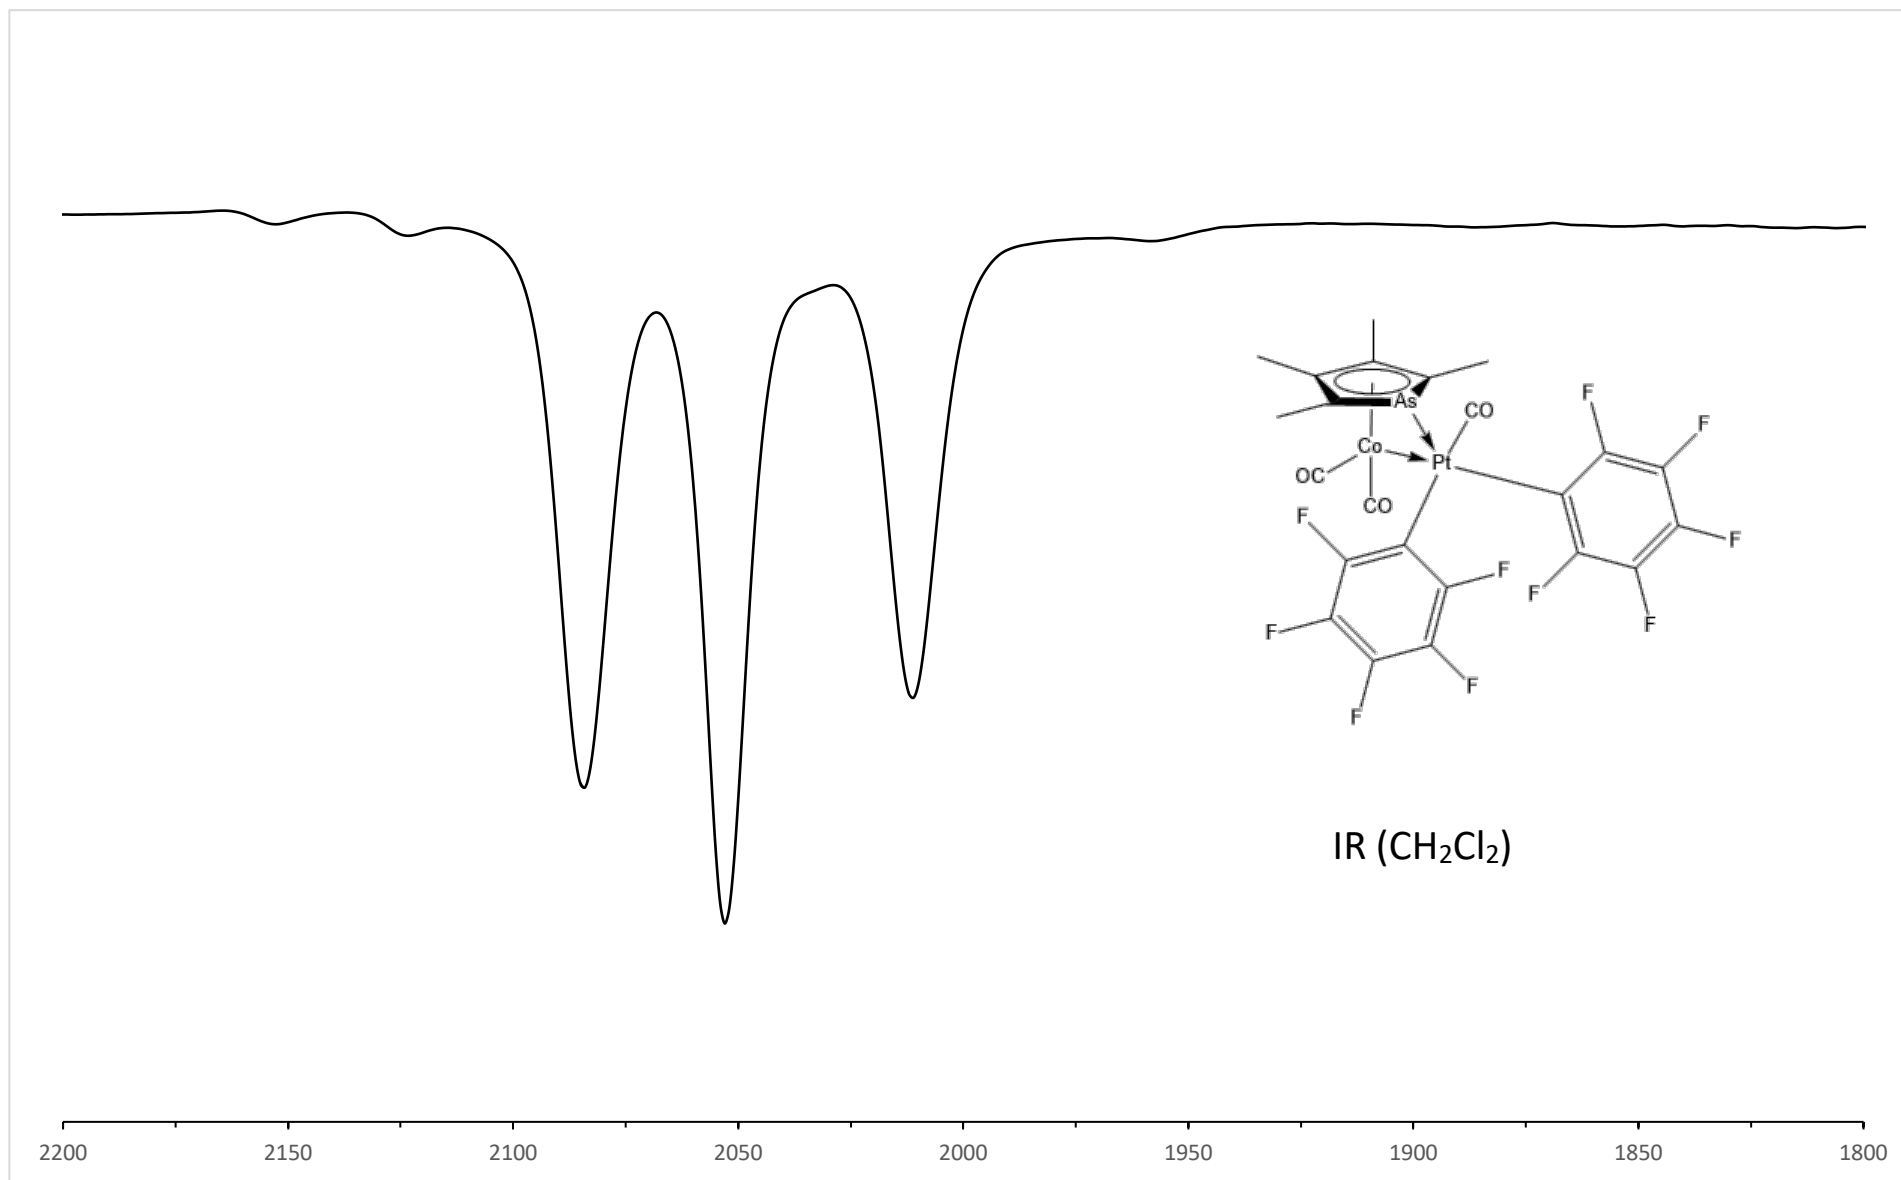

-ELECTRONIC SUPPORTING INFORMATION-

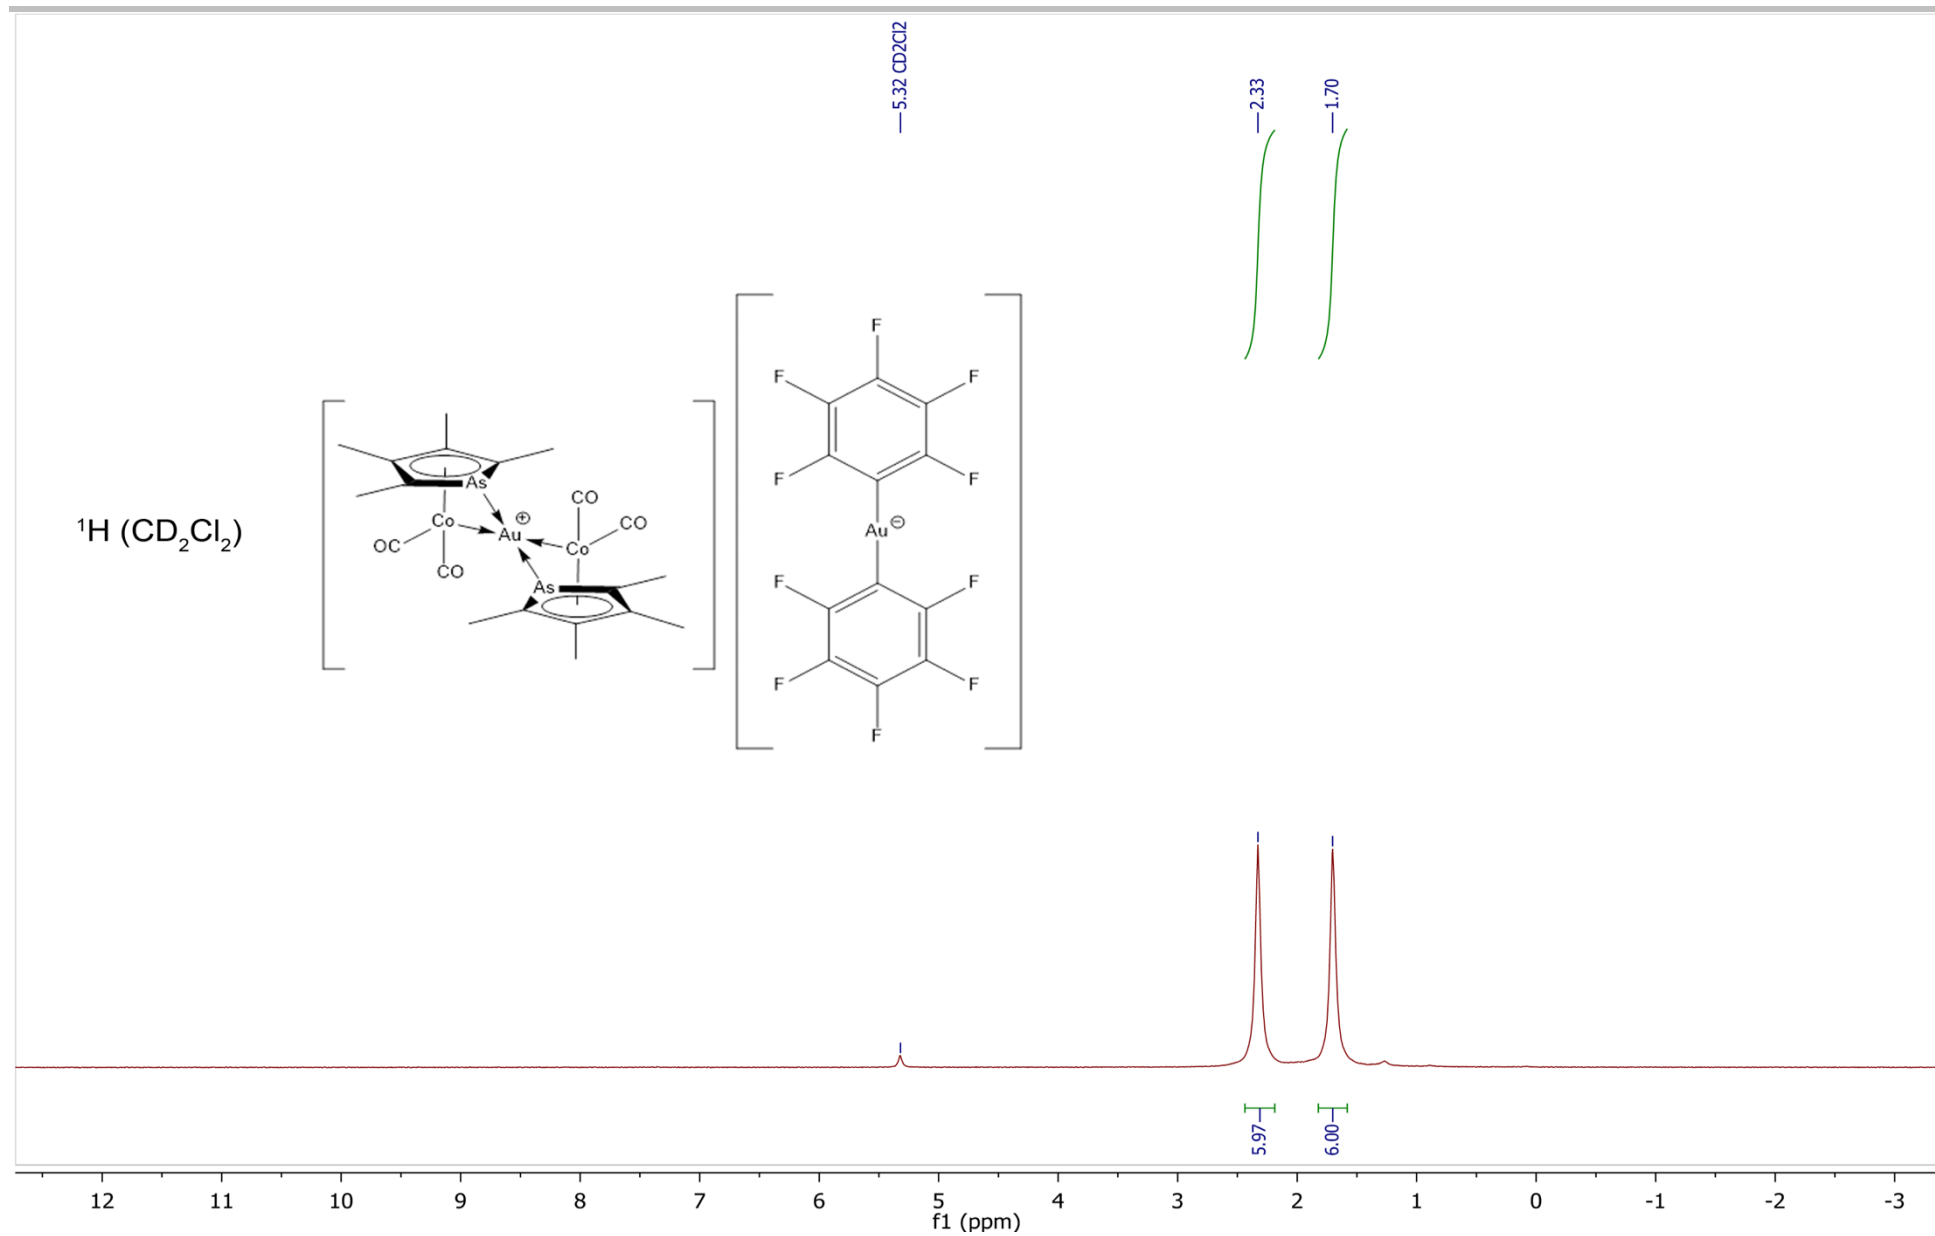

-ELECTRONIC SUPPORTING INFORMATION-

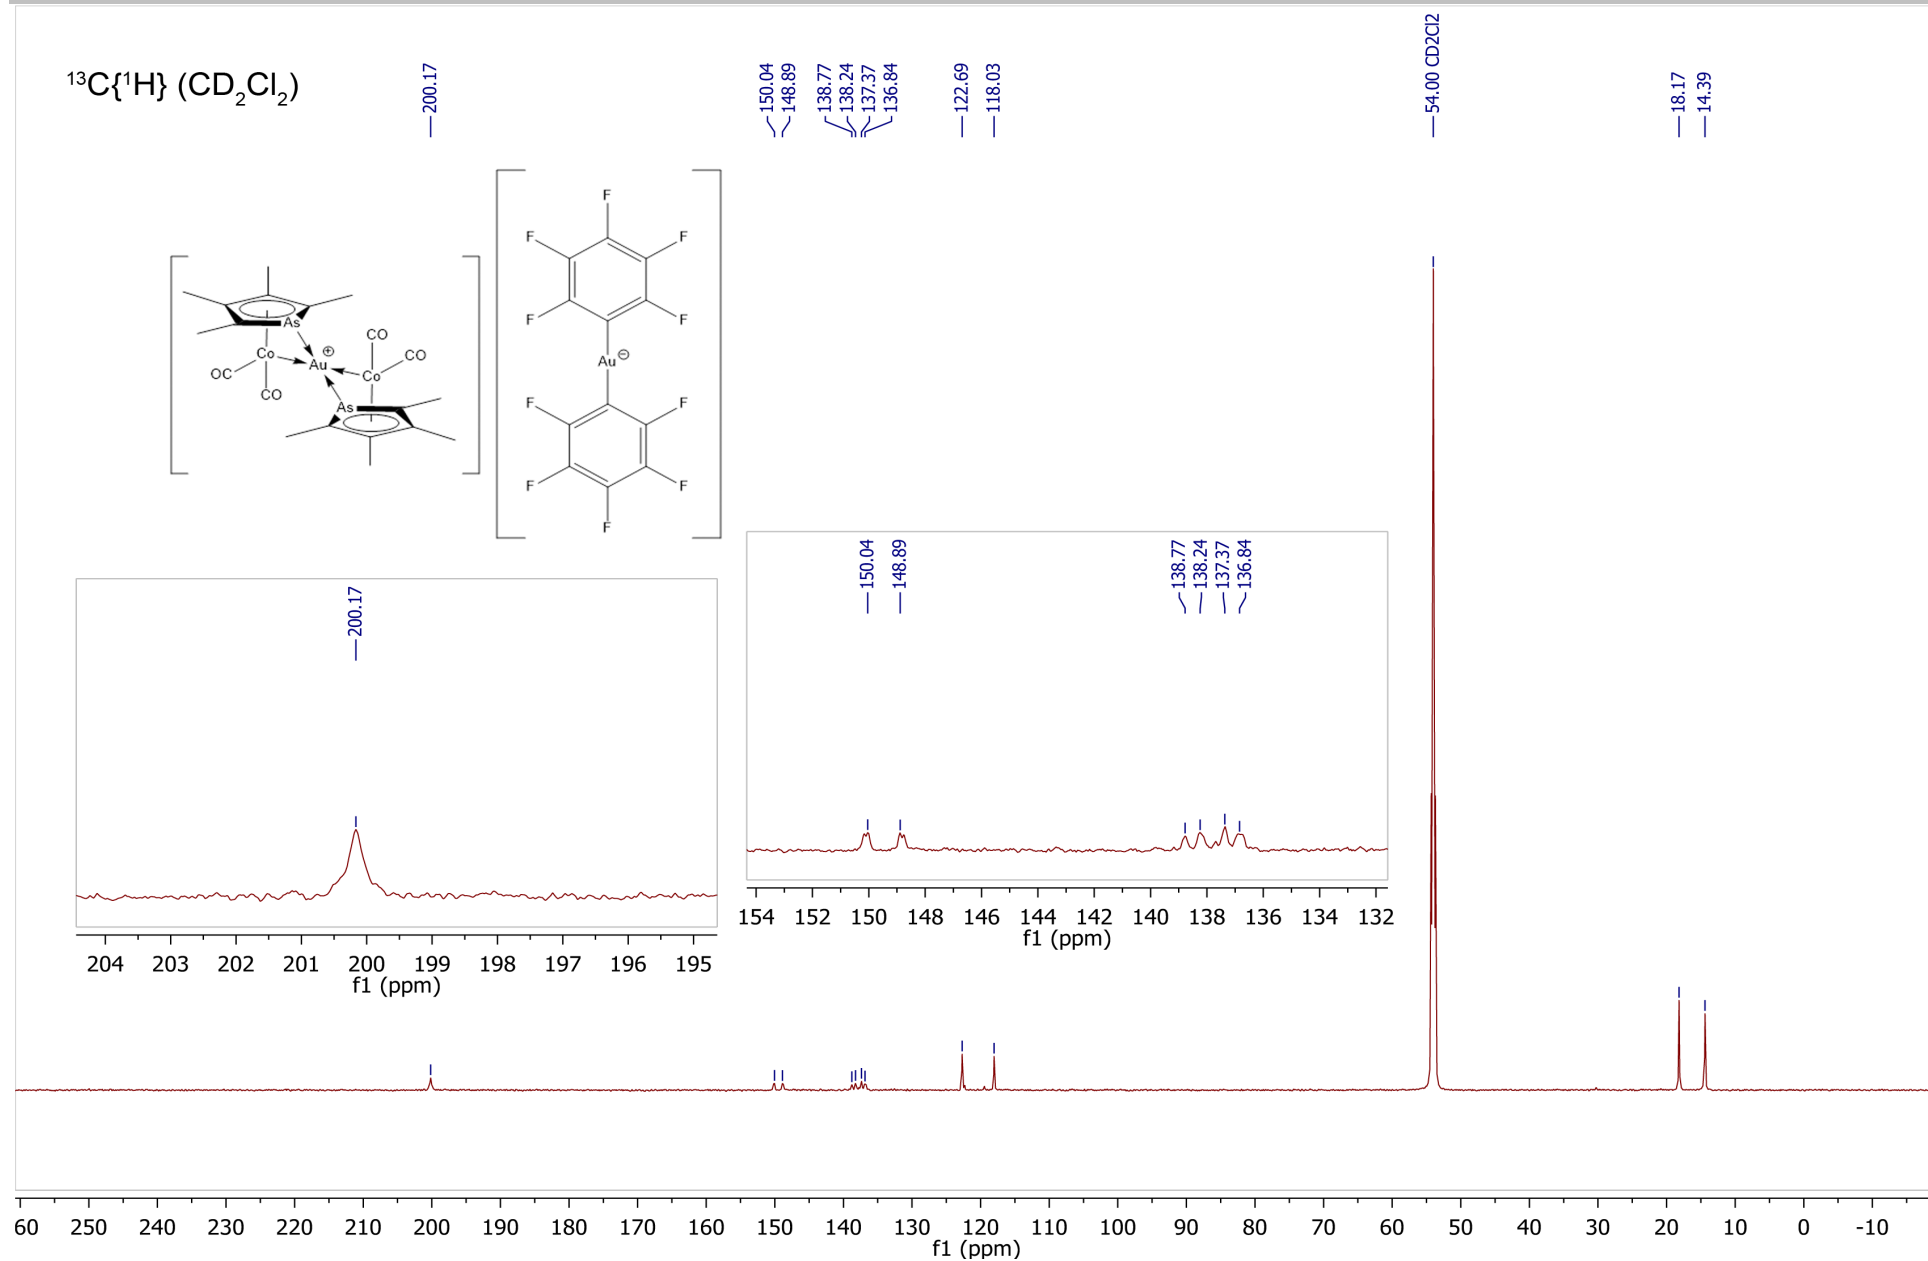

-ELECTRONIC SUPPORTING INFORMATION-

RMK-209-D

SYNAPT G2-Si#NotSet

13-Apr-2021

2021\_RSC Small molecule sample list

11:52:34

0390A (0.023) Is (1.00,0.10) C<sub>20</sub>H<sub>24</sub>As<sub>2</sub>Au<sub>1</sub>Co<sub>2</sub>O<sub>4</sub>

1: TOF MS ES+  
7.96e12

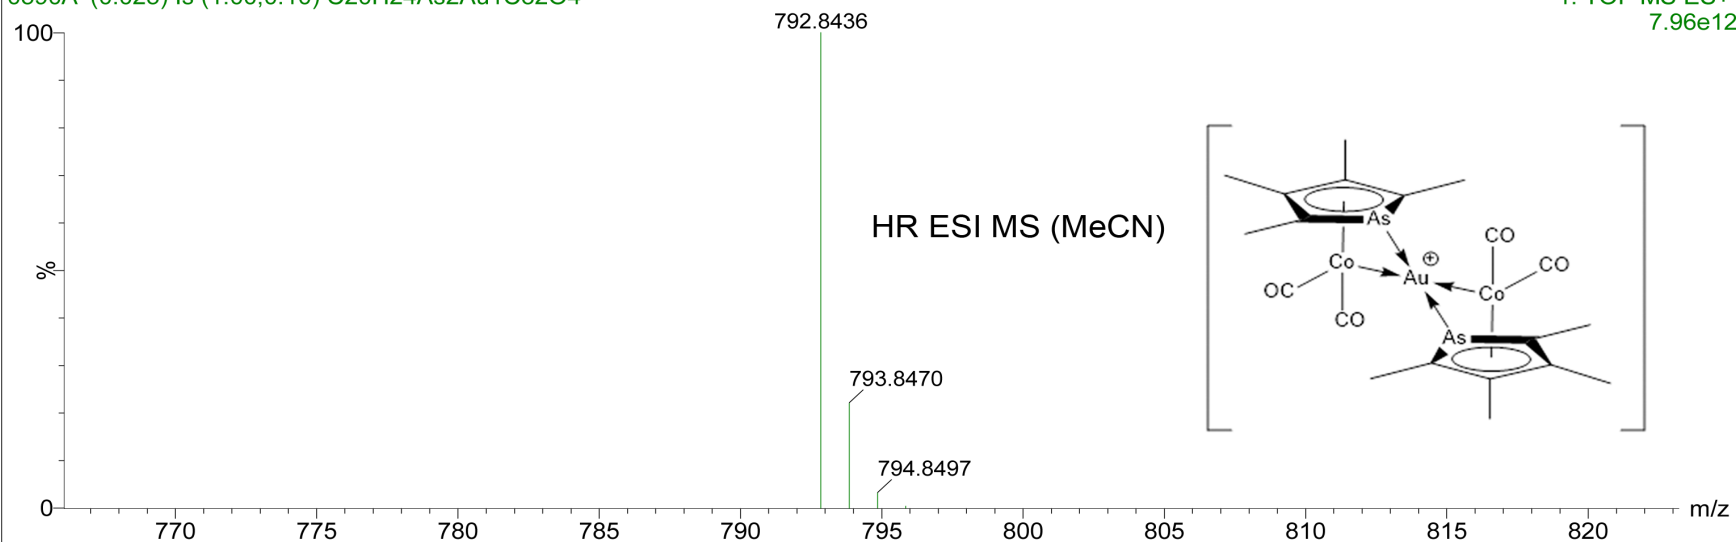

0390A 229 (0.467) Cm (221:238)

1: TOF MS ES+  
2.36e7

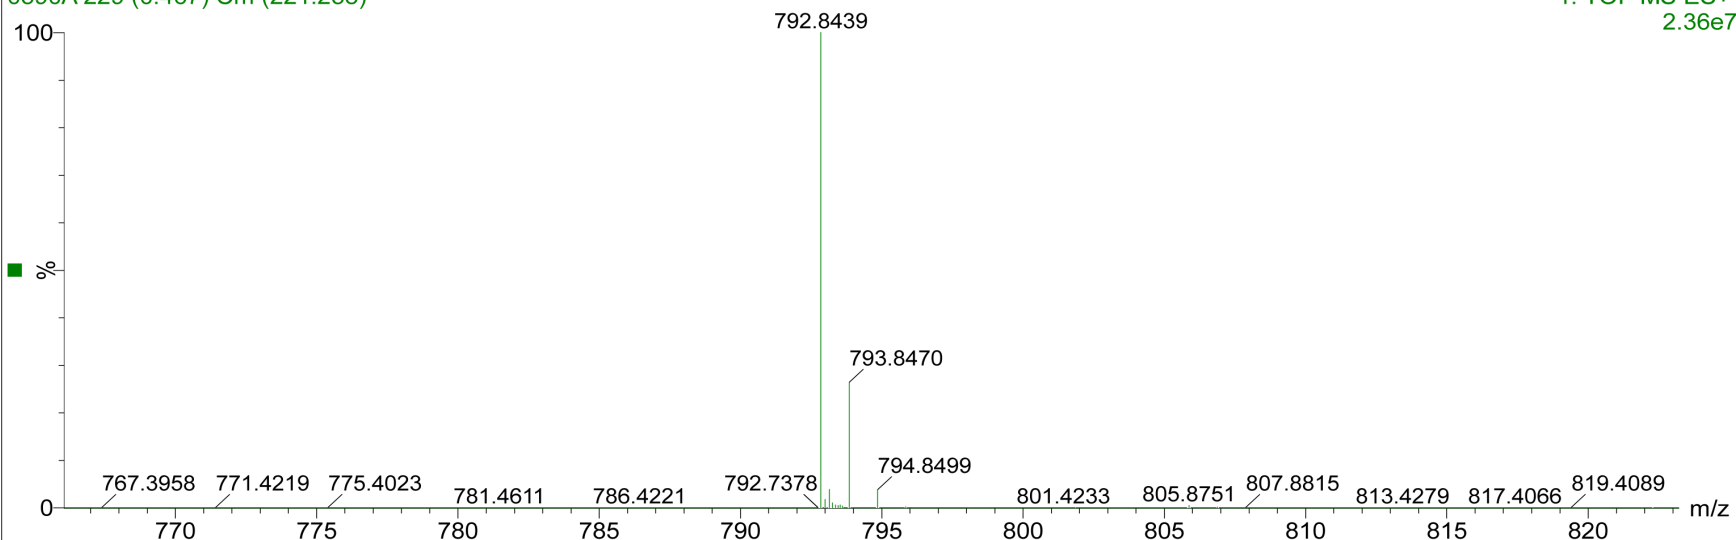



-ELECTRONIC SUPPORTING INFORMATION-

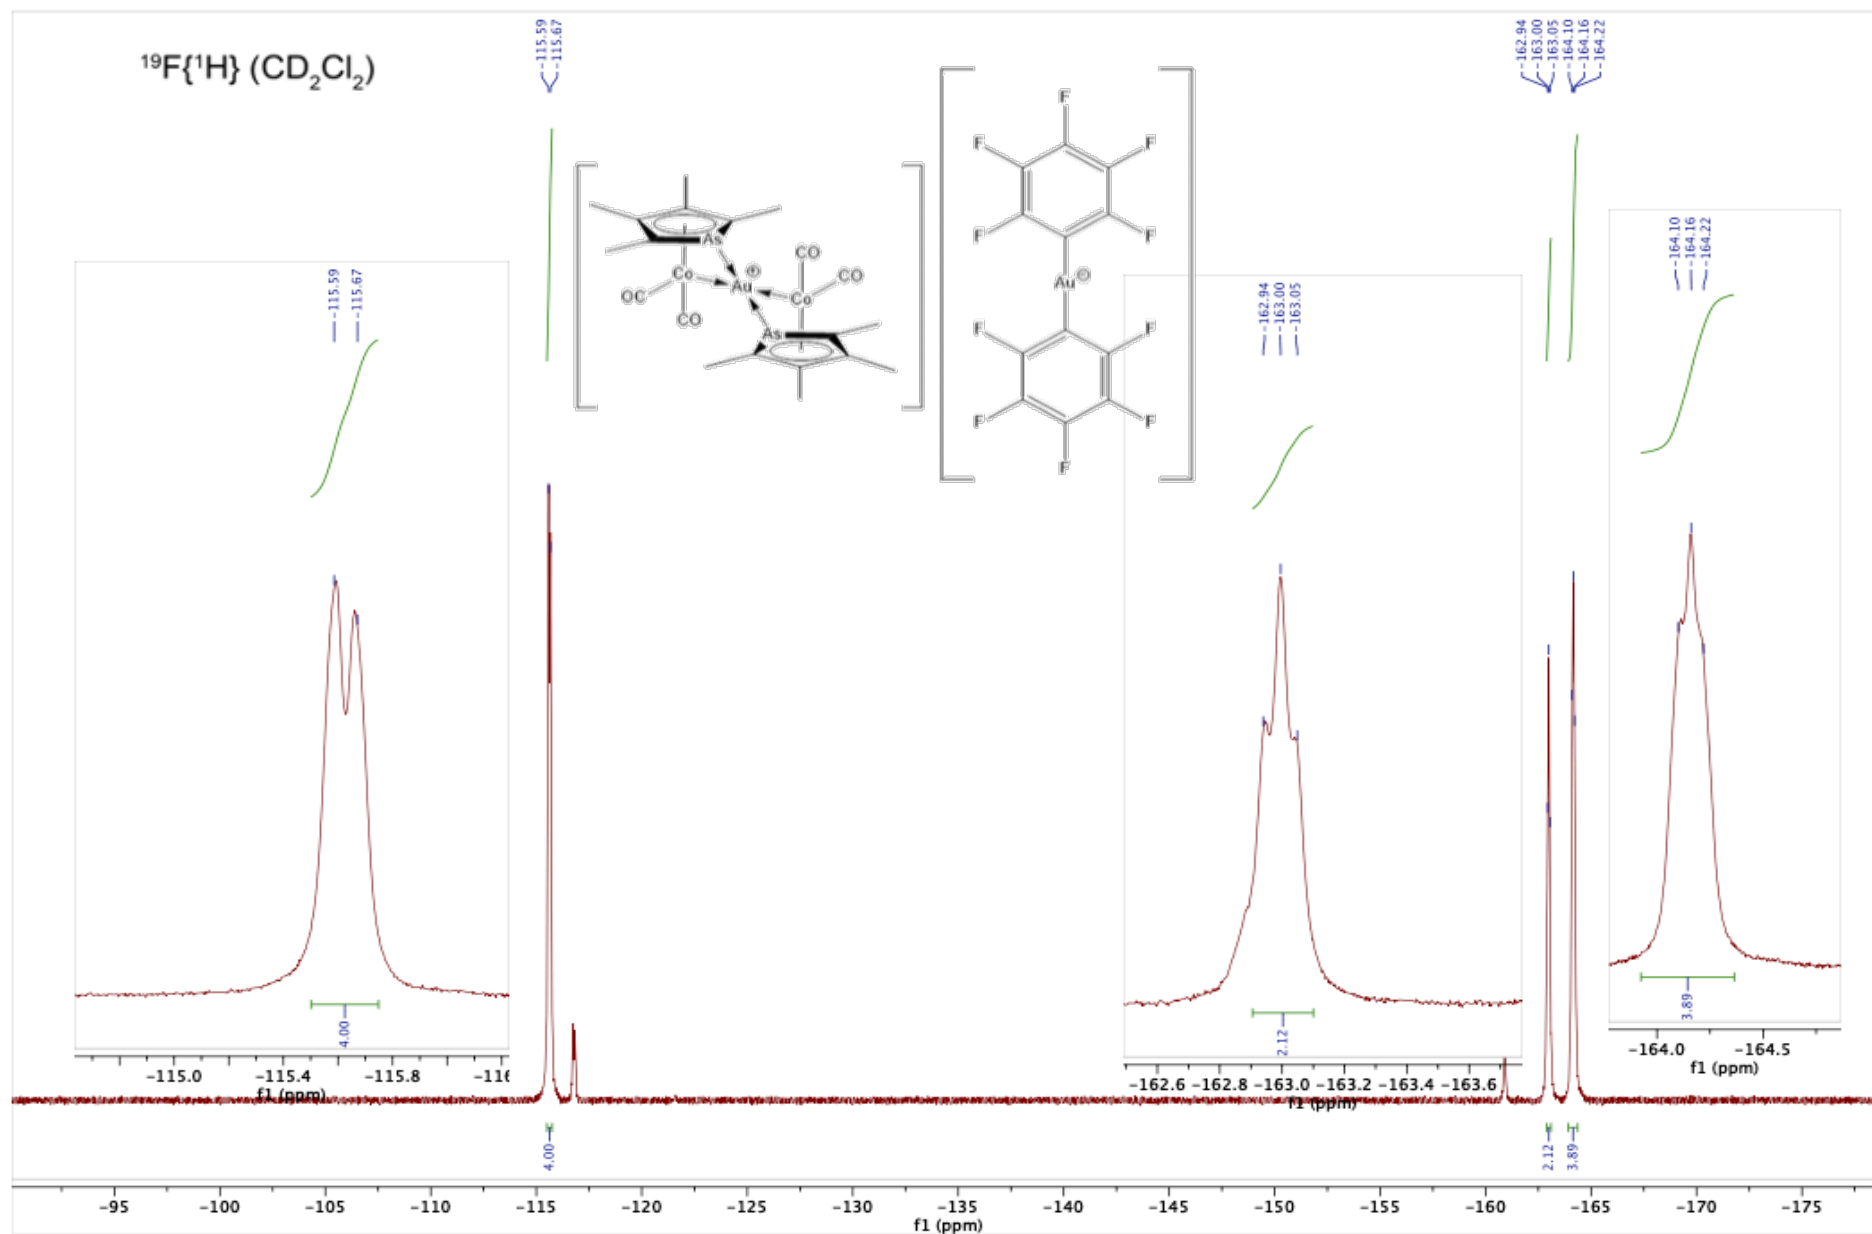

-ELECTRONIC SUPPORTING INFORMATION-

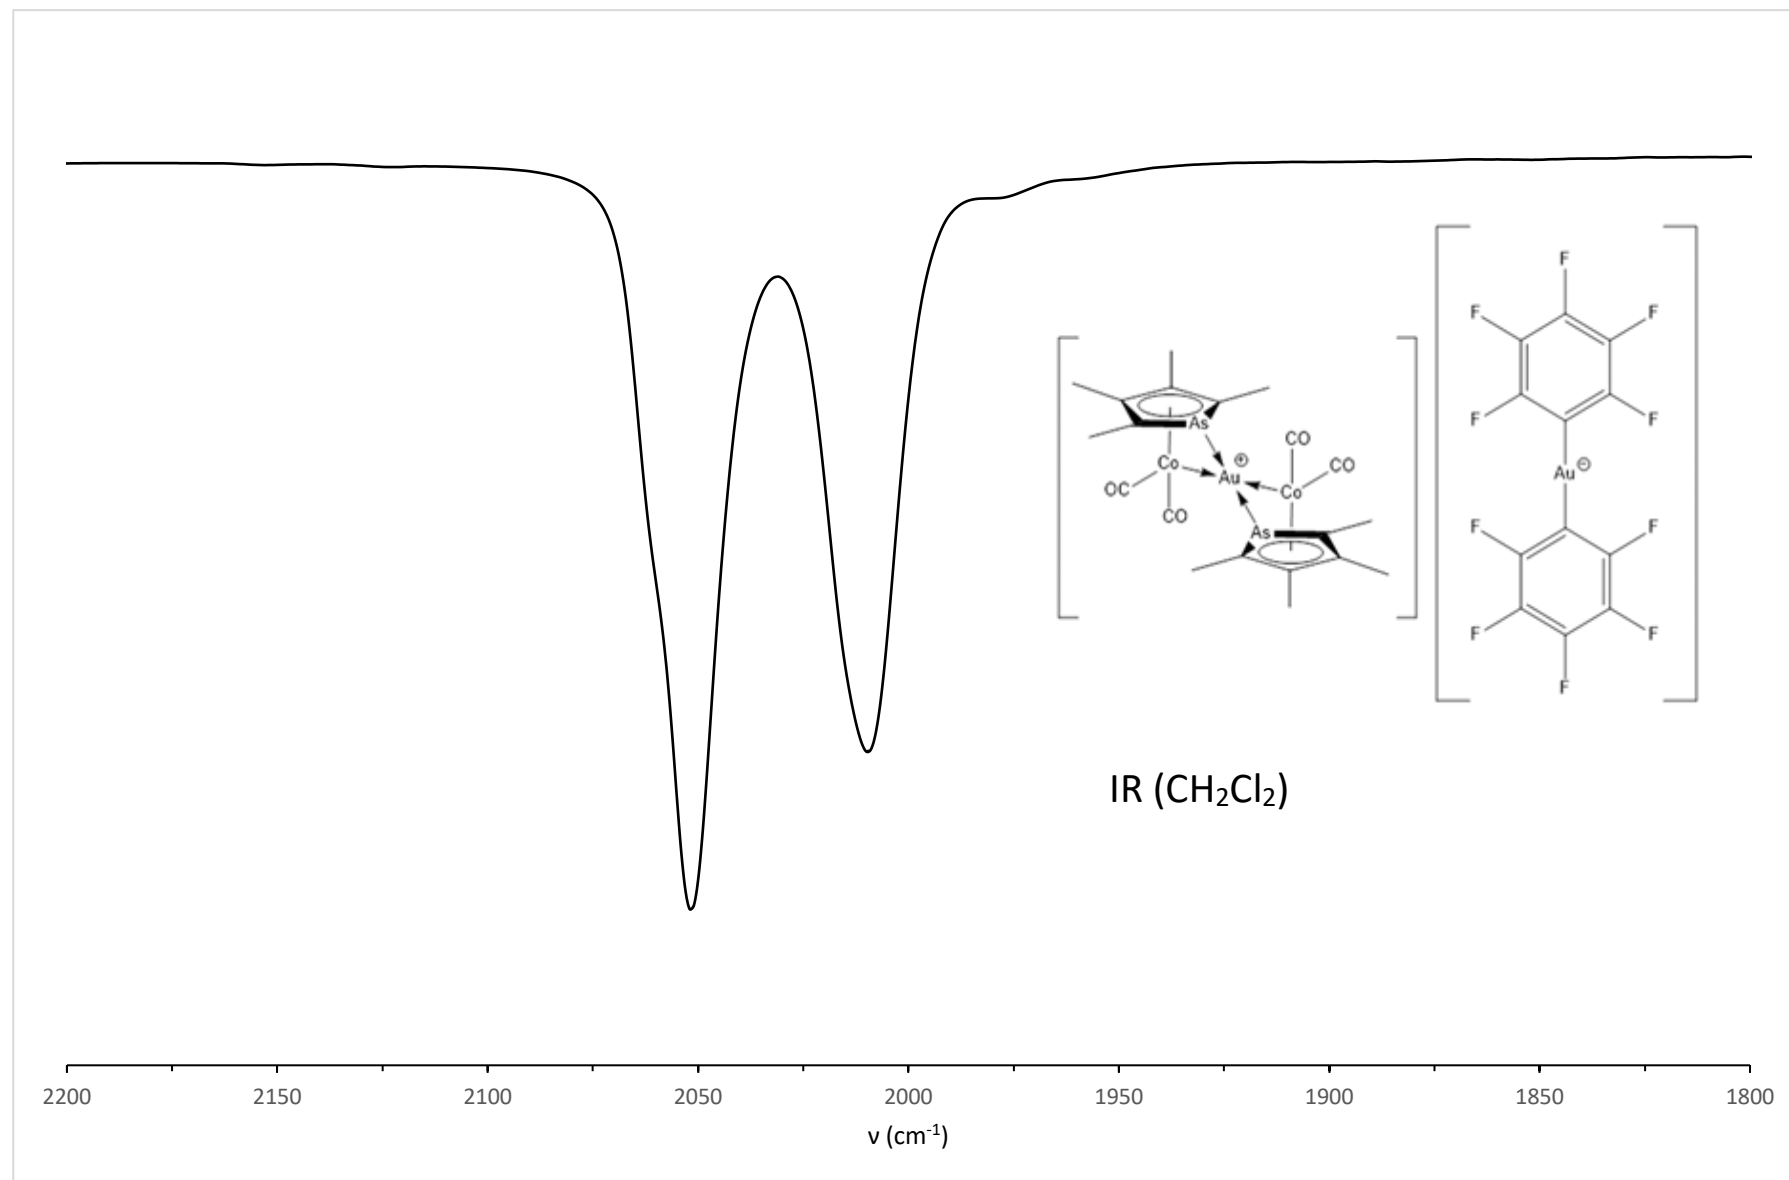

## 7. Author Contributions

RMK was responsible for the conceptualisation and execution of the experimental research, the acquisition and critical analysis of the characterisational data and compilation of the original draft. AFH was responsible for funding acquisition, project administration, validation and refinements to the manuscript.

## 8. References

- 1 a) H. Imoto, A. Urushizaki, I. Kawashima, K. Naka, *Chem. –Eur. J.*, **2018**, *24*, 8797-8803; b) P. J. Fagan, W. A. Nugent, J. C. Calabrese, *J. Am. Chem. Soc.*, **1994**, *116*, 1880-1889; c) M. Westerhausen, C. Gückel, H. Piotrowski, P. Mayer, M. Warchhold, H. Nöth, *Z. Anorg. Allg. Chem.*, **2001**, *627*, 1741-1750; d) M. Westerhausen, M. H. Digeser, C. Gückel, H. Nöth, J. Knizek, W. Ponikwar, *Organometallics* **1999**, *18*, 2491-2496.
- 2 a) E. H. Bray, W. Hübel, I. Caplier, *J. Am. Chem. Soc.*, **1961**, *83*, 4406-4413; b) F. C. Leavitt, T. A. Manuel, F. Johnson, L. U. Matternas, D. S. Lehman, *J. Am. Chem. Soc.*, **1960**, *82*, 5099-5102.
- 3 Spartan 20<sup>®</sup> (2020) Wavefunction, Inc., 18401 Von Karman Ave., Suite 370 Irvine, CA 92612 U.S.A
- 4 J.-D. Chai and M. Head-Gordon, *J. Chem. Phys.*, **2008**, *128*, 0841061-18410615; (b) J.-D. Chai and M. Head-Gordon, *Phys. Chem. Chem. Phys.*, **2008**, *10*, 6615- 6620.
- 5 a) P. J. Hay and W.R. Wadt, *J. Chem. Phys.*, **1985**, *82*, 270-283; b) W. R. Wadt and P. J. Hay, *J. Chem. Phys.* **1985**, *82*, 284-298; c) P. J. Hay, W. R. Wadt, *J. Chem. Phys.*, **1985**, *82*, 299-310.
- 6 W. J. Hehre, R. Ditchfeld and J. A. Pople, *J. Chem. Phys.*, 1972, **56**, 2257-2261
- 7 a) I. R. Lyatfov, G. M. Jafarov, V. N. Babin, P. V. Petrovskii, V. D. Zagorevskii, *J. Organomet. Chem.*, **1989**, *368*, 223-230; b) R. B. King, M. B. Bisnette, *J. Organomet. Chem.*, **1967**, *8*, 287-297.
- 8 J. W. Chambers, A. J. Baskar, S. G. Bott, J. L. Atwood, M. D. Rausch, *Organometallics* **1986**, *5*, 1635-1641.
- 9 C. Charrier, H. Bonnard, F. Mathey, D. Neibecker, *J. Organomet. Chem.*, **1982**, *231*, 361-367.
- 10 A. J. M. Caffyn, D. Carmichael, F. Mathey, L. Ricard, *Organometallics* **1997**, *16*, 2049-2054.
- 11 CrysAlisPRO<sup>®</sup>, Oxford Diffraction/Agilent Technologies UK Ltd., Yarnton, England, **2010**.
- 12 O. V. Dolomanov, L. J. Bourhis, R. J. Gildea, J. A. K. Howard, H. Puschmann, *J. Appl. Crystallog.*, **2009**, *42*, 339-341.
- 13 G. Sheldrick, *Acta Crystallog. Sect. A* **2015**, *71*, 3-8.
- 14 G. Sheldrick, *Acta Crystallog. Sect. C* **2015**, *71*, 3-8.
